# Supplementary material for: Nickel catalyzed sustainable synthesis of benzazoles and purines via acceptorless dehydrogenative coupling and borrowing hydrogen approach
Source: Royal Society of Chemistry journal article supplement (doi:10.1039/d1ob01154e), 2021-01-01
Supplement: d1ob01154e1.pdf [file d1ob01154e1.pdf]

# **Nickel catalyzed sustainable synthesis of benzazoles and purines via acceptorless dehydrogenative coupling and borrowing hydrogen approach**

Gargi Chakraborty, Rakesh Mondal, Amit Kumar Guin and Nanda D. Paul\*

Department of Chemistry, Indian Institute of Engineering Science and Technology, Shibpur  
Botanic Garden, Howrah 711103, India

| <b>Table of Contents</b>                                                                                            |        |
|---------------------------------------------------------------------------------------------------------------------|--------|
| Optimization of Reaction Conditions for 8-Substituted-9 <i>H</i> -purines and 8,9-disubstituted-9 <i>H</i> -purines | S3     |
| Deuterium Labelling Experiment                                                                                      | S4     |
| Figures of <sup>1</sup> H and <sup>13</sup> C NMR spectra                                                           | S5-S60 |
| References                                                                                                          | S61    |

**Table S1.** Optimization of Reaction Conditions for 8-Substituted-9*H*-purines and 8,9-disubstituted-9*H*-purines <sup>a-f</sup>.

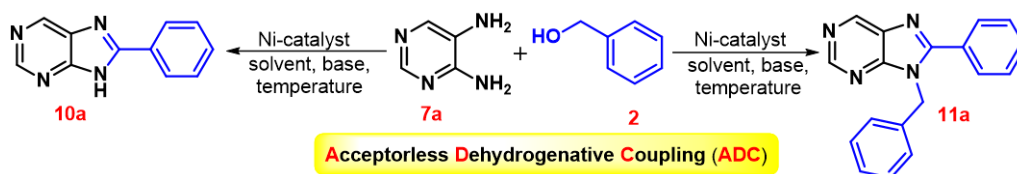

| Entry | Ni- Catalyst (mol%)                                                      | Solvent | Base                           | Temp. (°C) | Yield (%)       |                 |
|-------|--------------------------------------------------------------------------|---------|--------------------------------|------------|-----------------|-----------------|
|       |                                                                          |         |                                |            | Purines         |                 |
|       |                                                                          |         |                                |            | <b>10a</b>      | <b>11a</b>      |
| 1     | <b>1a</b> (3.0)                                                          | toluene | KO <sup>t</sup> Bu             | 100°C      | 70              | 45              |
| 2     | <b>1a</b> (3.0)                                                          | toluene | NaO <sup>t</sup> Bu            | 100°C      | 59              | 35              |
| 3     | <b>1a</b> (3.0)                                                          | toluene | KOH                            | 100°C      | 53              | 32              |
| 4     | <b>1a</b> (3.0)                                                          | toluene | K <sub>3</sub> PO <sub>4</sub> | 100°C      | NR              | NR              |
| 5     | <b>1a</b> (3.0)                                                          | toluene | NEt <sub>3</sub>               | 100°C      | NR              | NR              |
| 6     | <b>1a</b> (3.0)                                                          | xylene  | KO <sup>t</sup> Bu             | 100°C      | 67              | 41              |
| 7     | <b>1a</b> (3.0)                                                          | THF     | KO <sup>t</sup> Bu             | 100°C      | trace           | trace           |
| 8     | <b>1a</b> (3.0)                                                          | ethanol | KO <sup>t</sup> Bu             | 100°C      | NR              | NR              |
| 9     | <b>1a</b> (3.0)                                                          | xylene  | KO <sup>t</sup> Bu             | 120°C      | 57              | 51              |
| 10    | <b>1a</b> (3.0)                                                          | xylene  | KO <sup>t</sup> Bu             | 140°C      | 42              | 39              |
| 11    | <b>1a</b> (3.0)                                                          | toluene | KO <sup>t</sup> Bu             | 100°C      | 68 <sup>d</sup> | NR <sup>d</sup> |
| 12    | <b>1b</b> (3.0)                                                          | toluene | KO <sup>t</sup> Bu             | 100°C      | 34              | -               |
| 13    | <b>1a</b> (3.0)                                                          | xylene  | KO <sup>t</sup> Bu             | 120°C      | -               | 23              |
| 14    | -                                                                        | xylene  | KO <sup>t</sup> Bu             | 120°C      | trace           | trace           |
| 15    | <b>1a</b> (3.0)                                                          | xylene  | -                              | 120°C      | NR              | NR              |
| 16    | NiCl <sub>2</sub> (10.0)                                                 | xylene  | KO <sup>t</sup> Bu             | 120°C      | NR              | NR              |
| 17    | Ni(OAc) <sub>2</sub> (10.0)                                              | xylene  | KO <sup>t</sup> Bu             | 120°C      | NR              | NR              |
| 18    | NiCl <sub>2</sub> (3.0) + DME                                            | xylene  | KO <sup>t</sup> Bu             | 120°C      | trace           | trace           |
| 19    | NiCl <sub>2</sub> (3.0) + P(C <sub>4</sub> H <sub>9</sub> ) <sub>3</sub> | xylene  | KO <sup>t</sup> Bu             | 120°C      | trace           | trace           |

For **10a**. <sup>a</sup>Stoichiometry: benzylalcohol (**2a**) (1.0 mmol), 4,5-diaminopyrimidine (**7a**) (1.0 mmol), base (0.75 mmol); <sup>b</sup>Solvent: 5.0 mL; <sup>c</sup>Under argon atmosphere; <sup>d</sup>Under aerobic condition; <sup>e</sup>Time: 24h; <sup>f</sup>Isolated yield after column chromatography.  
 For **11a**. <sup>a</sup>Stoichiometry: benzylalcohol (**2a**) (2.0 mmol), 4,5-diaminopyrimidine (**7a**) (1.0 mmol), base (2.0 mmol); <sup>b</sup>Solvent: 5.0 mL; <sup>c</sup>Under argon atmosphere; <sup>d</sup>Under aerial condition; <sup>e</sup>Time: 36h; <sup>f</sup>Isolated yield after column chromatography.

## Deuterium Labelling Experiment.

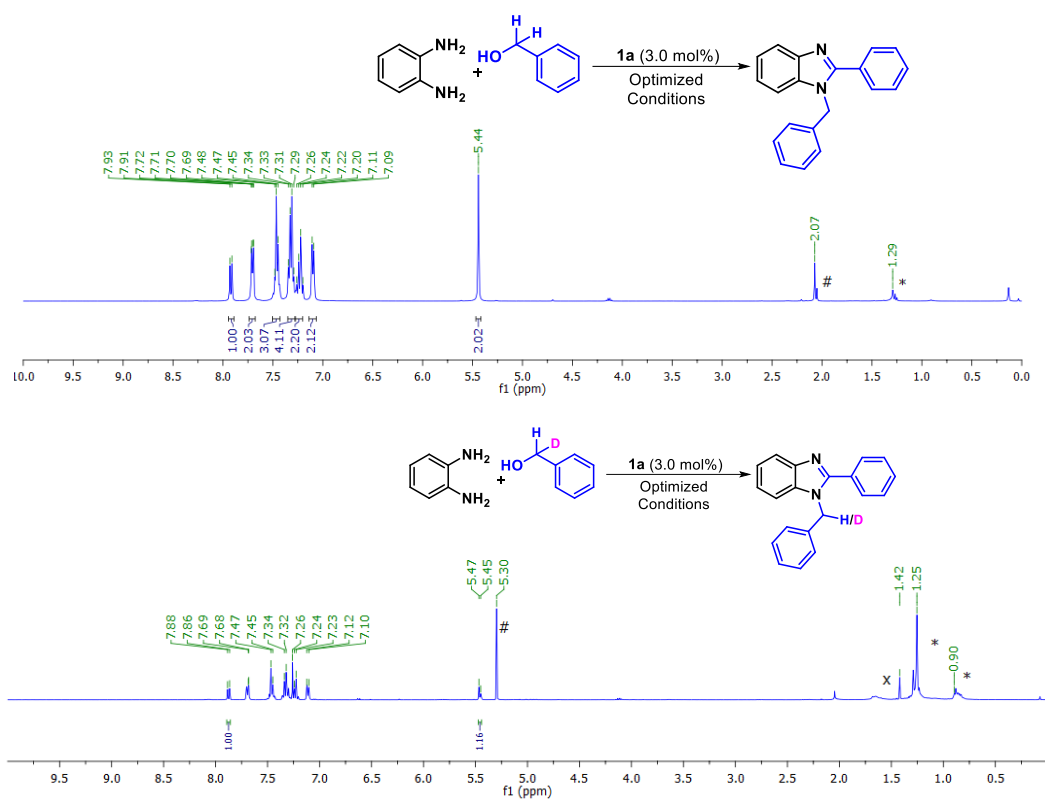

**Fig S1.**  $^1\text{H}$  NMR spectra of **8a** and **8a-d** in  $\text{CDCl}_3$  solvent (#dichloromethane,  $^x$ water,  $^*$ hexane)

## Figures of $^1\text{H}$ and $^{13}\text{C}$ NMR Spectra of Isolated Compounds.

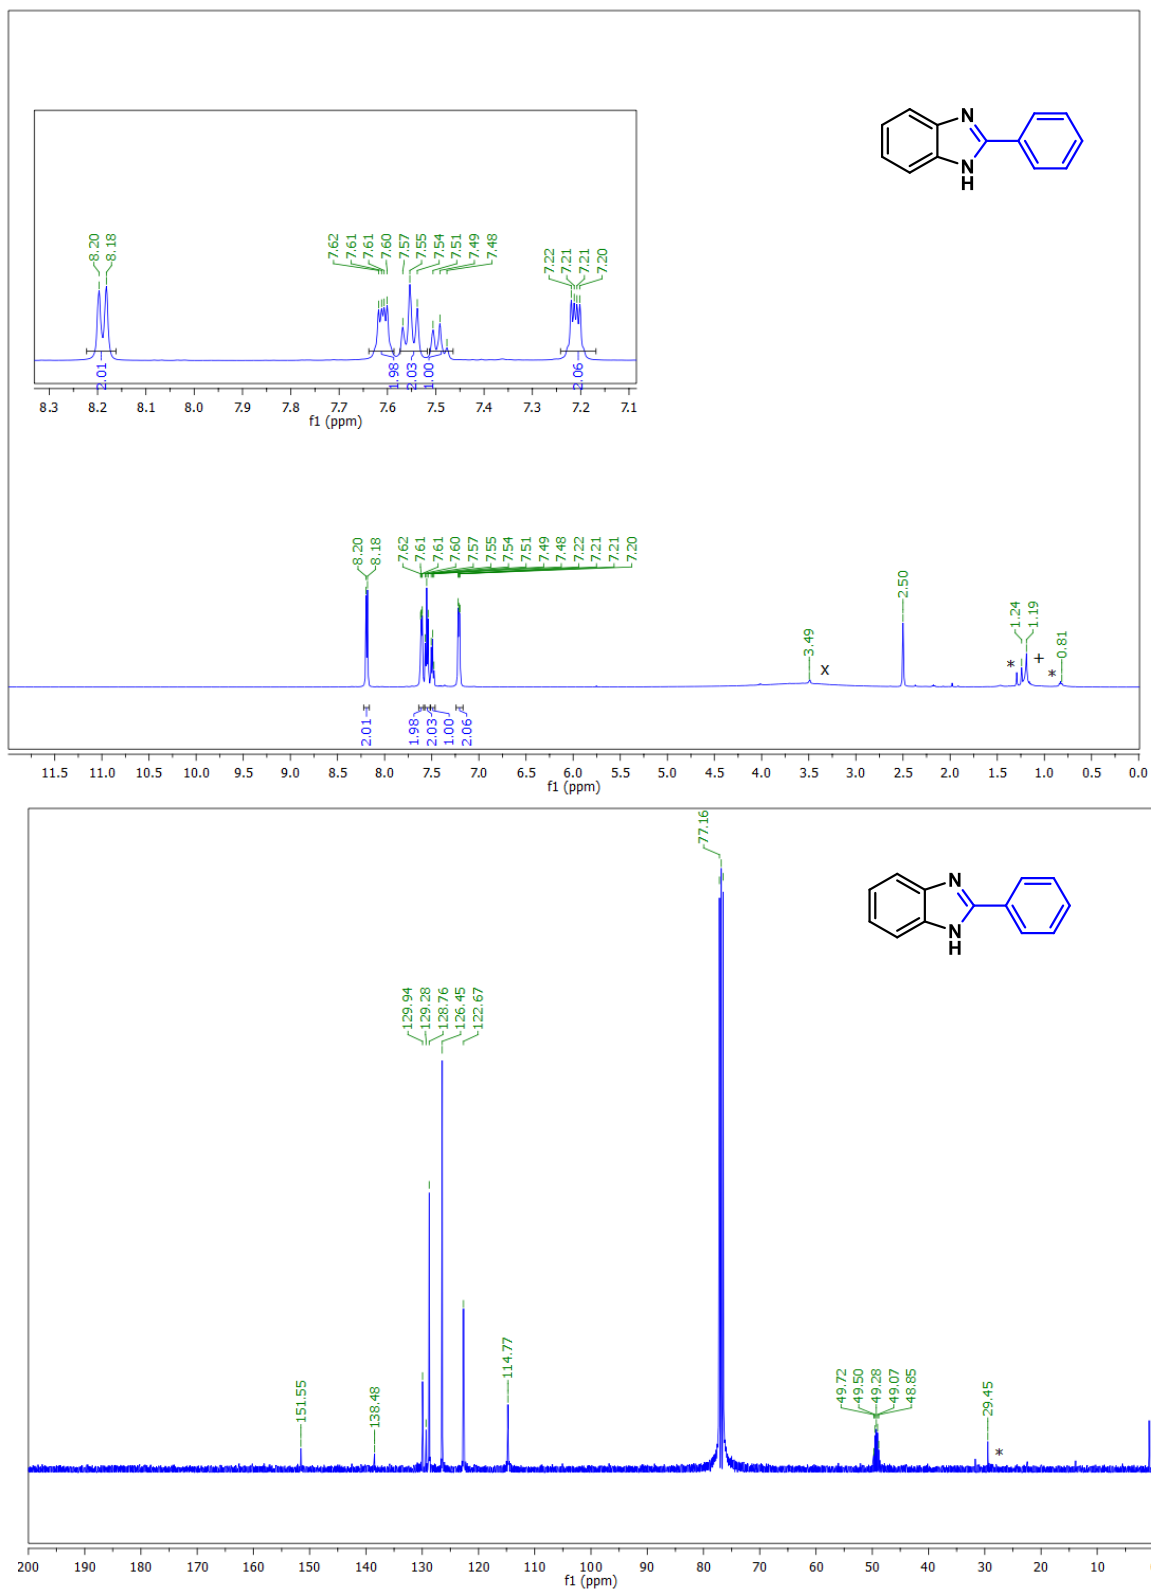

**Fig S2.**  $^1\text{H}$  and  $^{13}\text{C}$  NMR spectra of **5a** (in  $\text{DMSO-d}_6$  and  $\text{CDCl}_3$ + 1 drop  $\text{CD}_3\text{OD}$  solvent) ( $^x$ water, \*hexane,  $^+$ ethyl acetate).

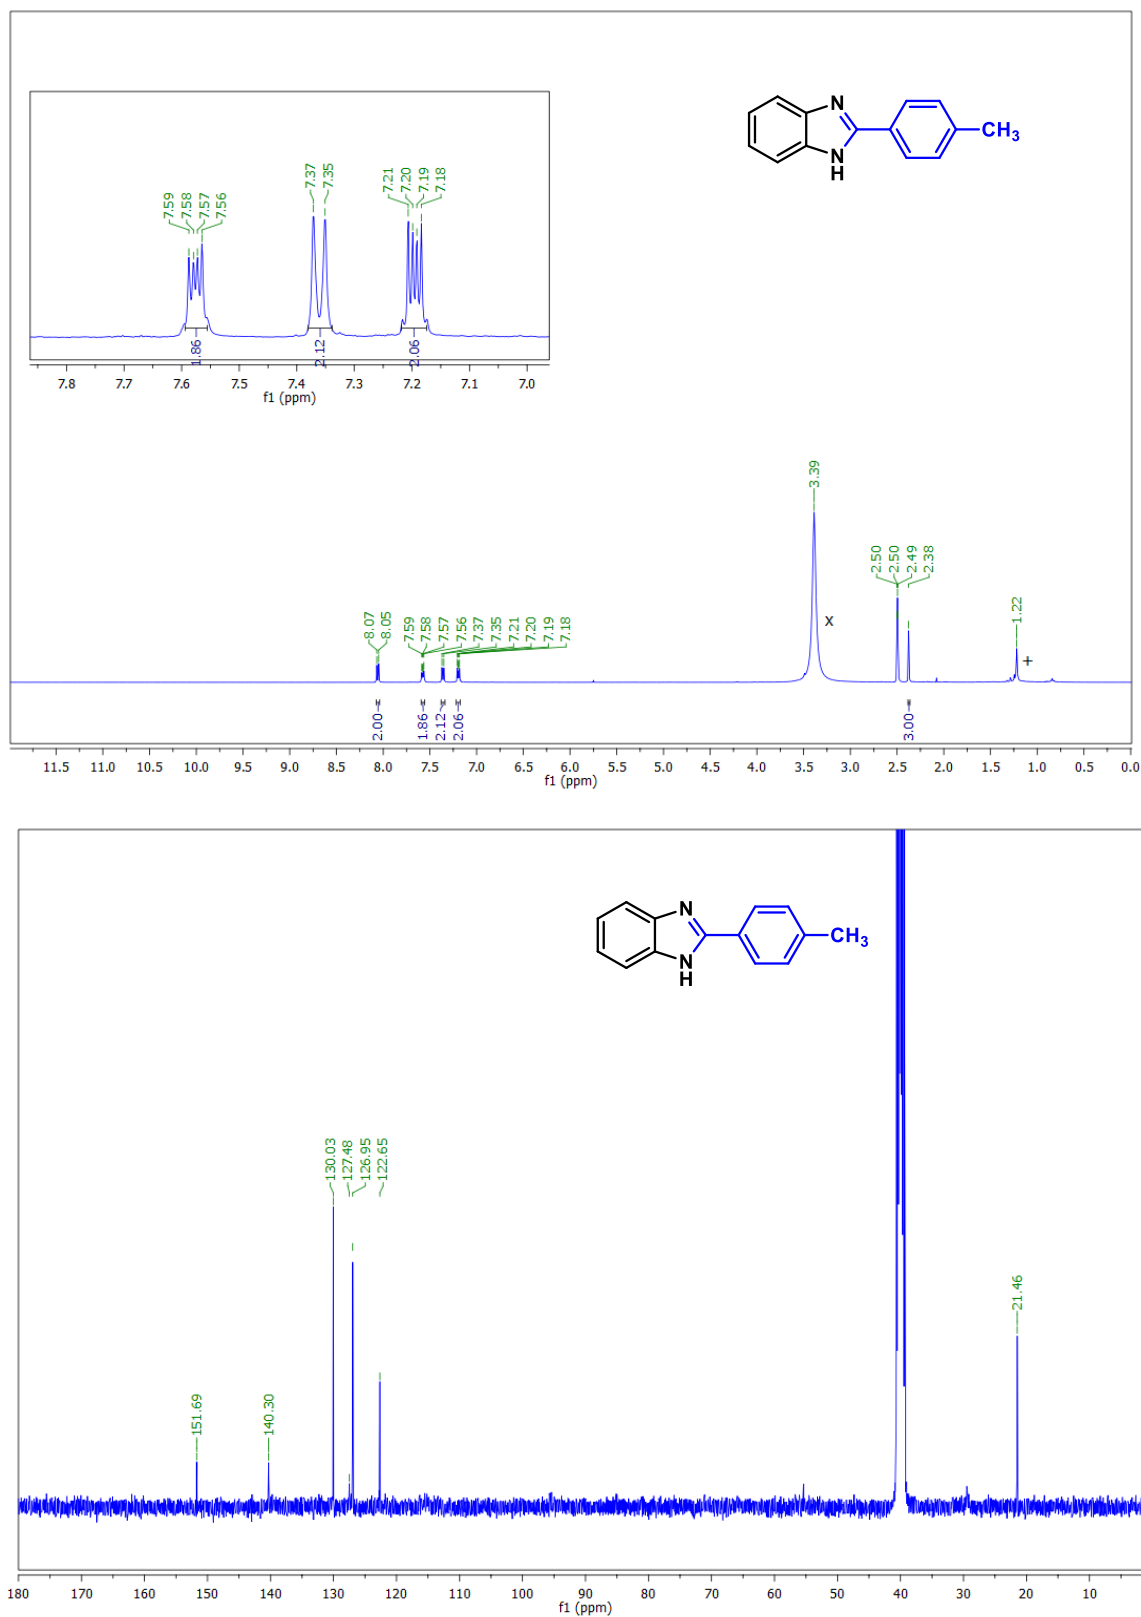

**Fig S3.** <sup>1</sup>H and <sup>13</sup>C NMR spectra of **5b** (in DMSO-d<sub>6</sub> solvent) (x water, + ethyl acetate).

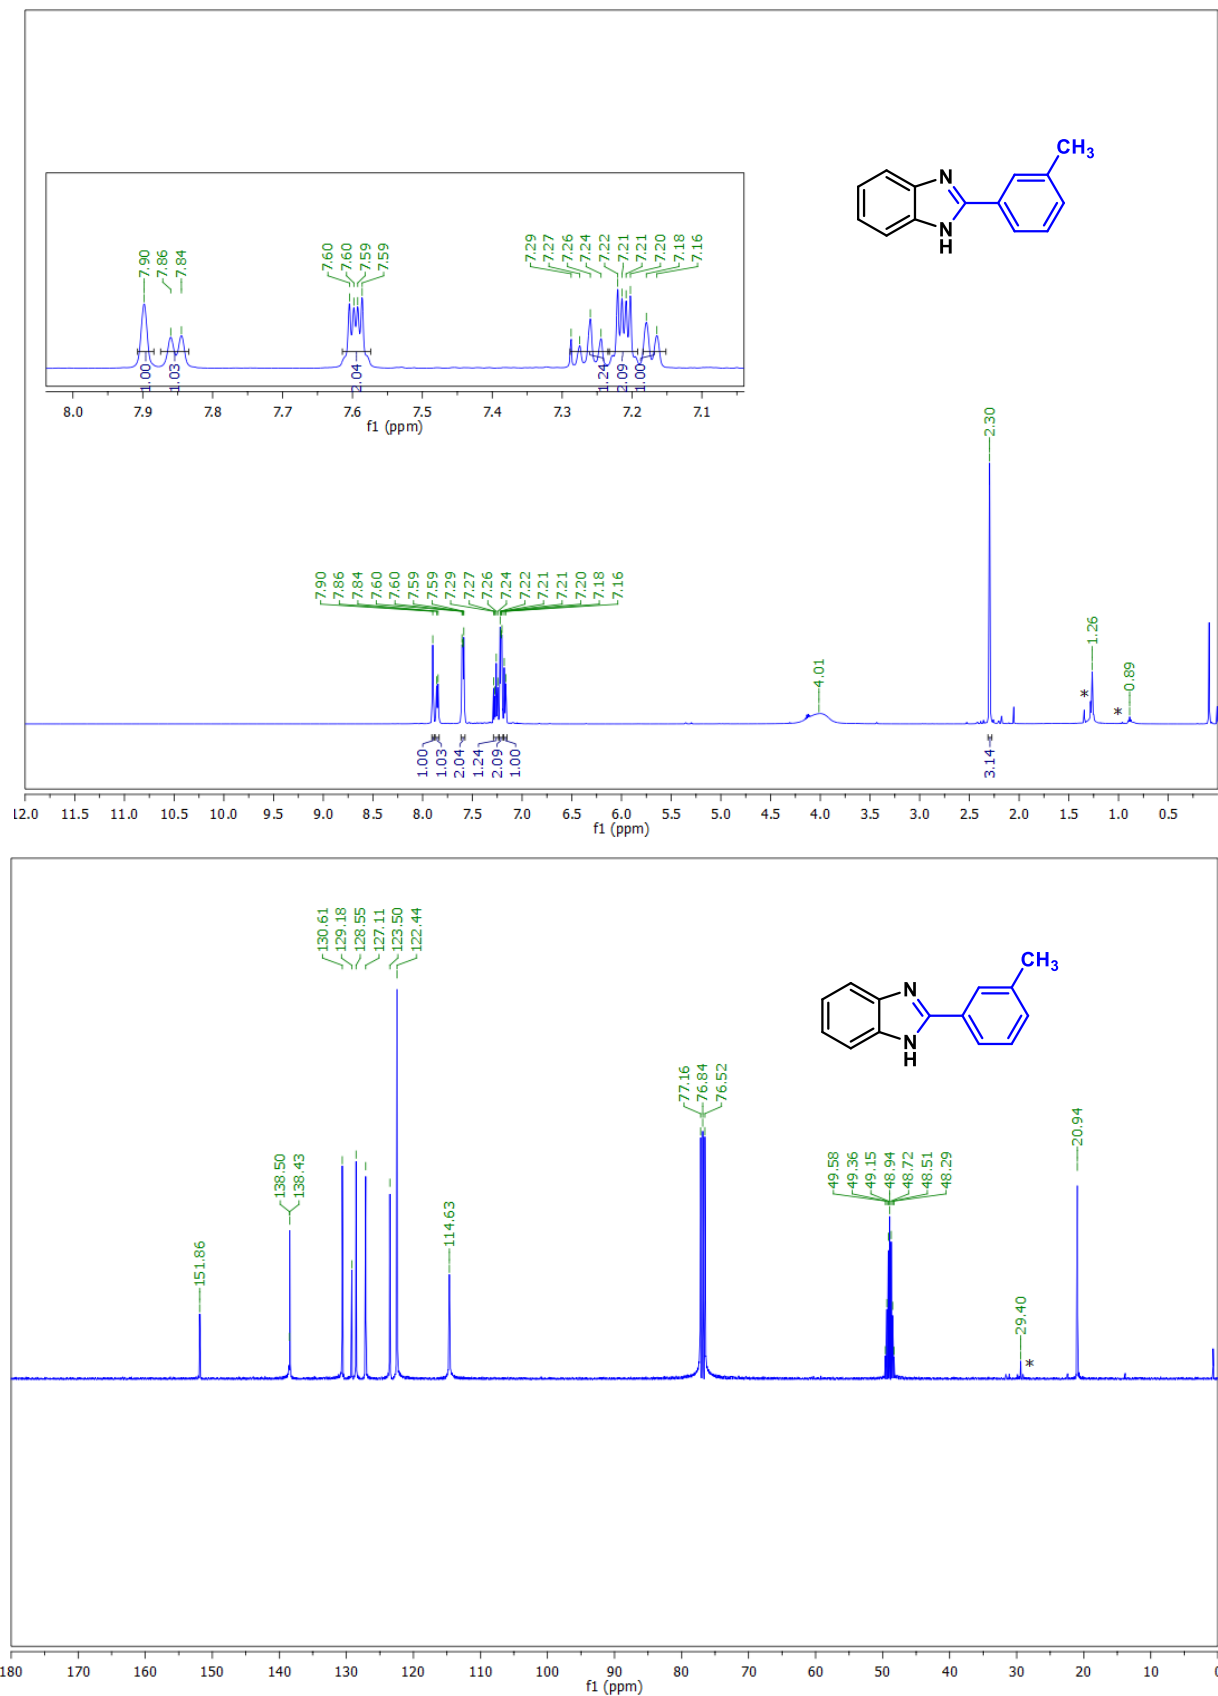

**Fig S4.**  $^1\text{H}$  and  $^{13}\text{C}$  NMR spectra of **5c** (in  $\text{CDCl}_3$ + 1 drop  $\text{CD}_3\text{OD}$  solvent) (\*hexane).

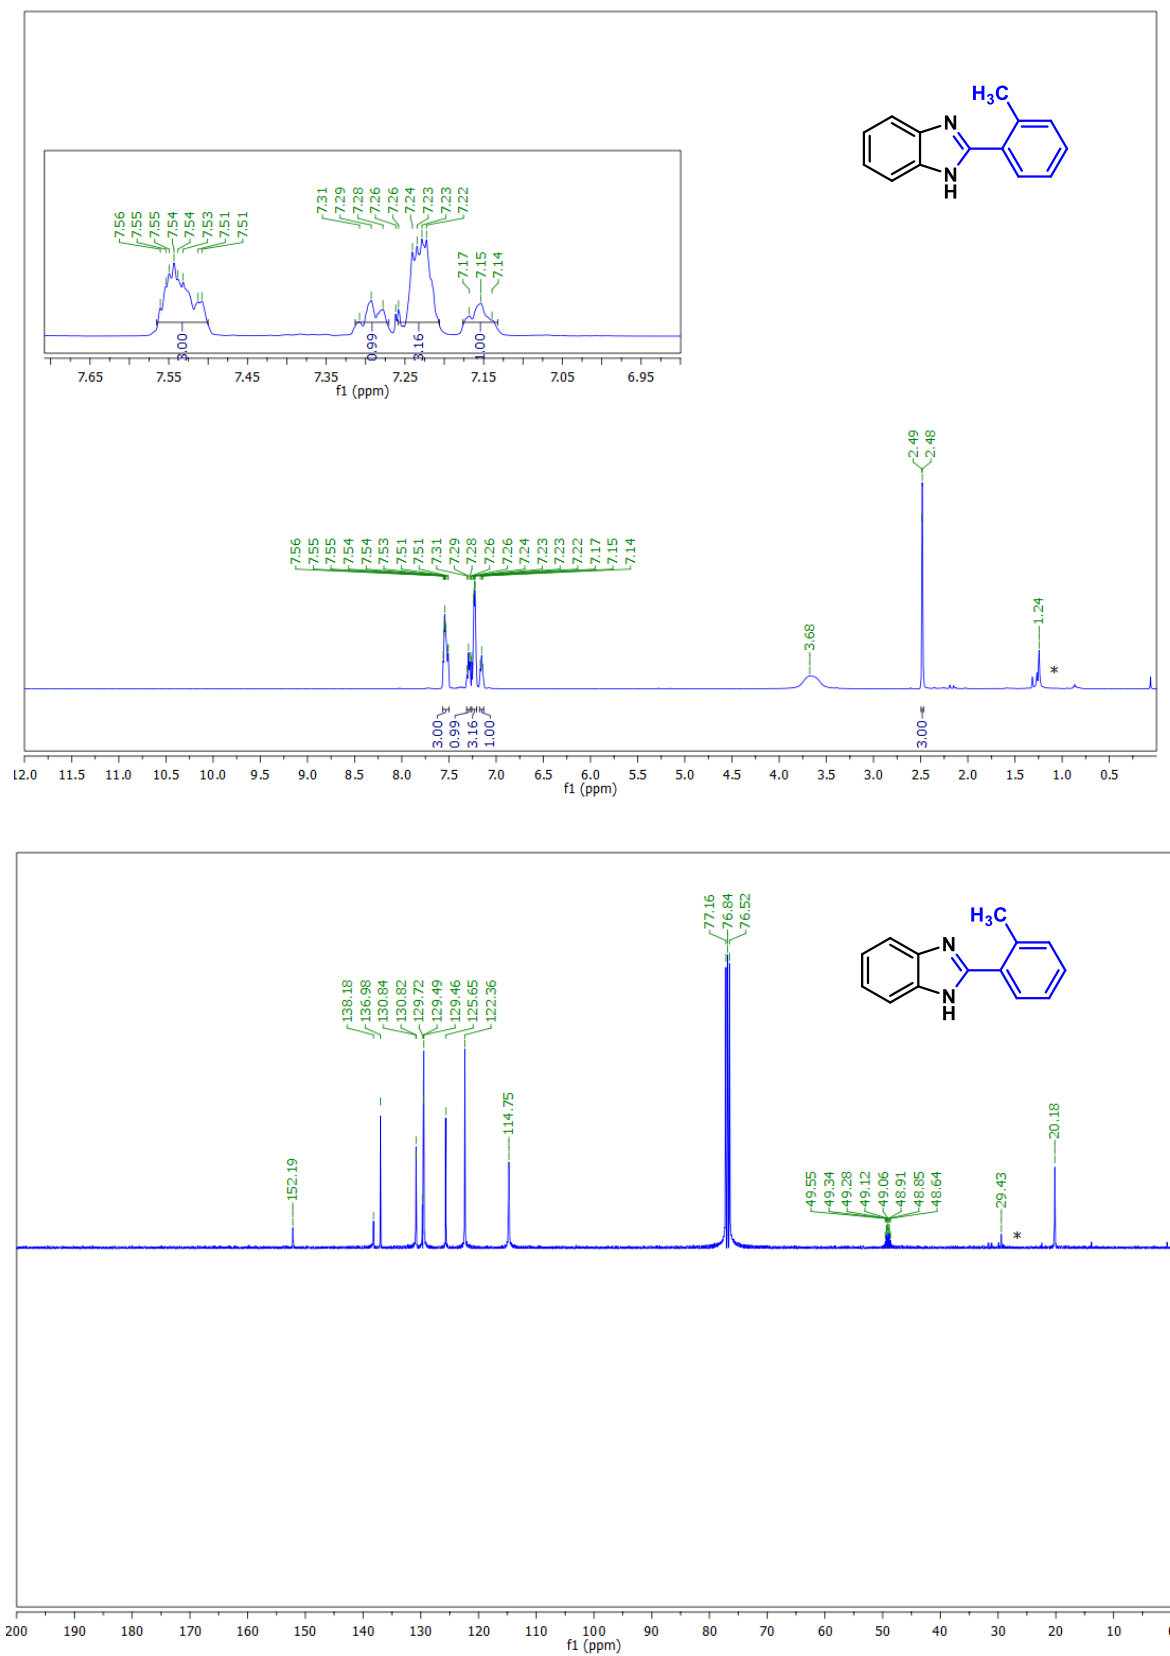

**Fig S5.** <sup>1</sup>H and <sup>13</sup>C NMR spectra of **5d** (in CDCl<sub>3</sub>+ 1 drop CD<sub>3</sub>OD solvent) (\*hexane).



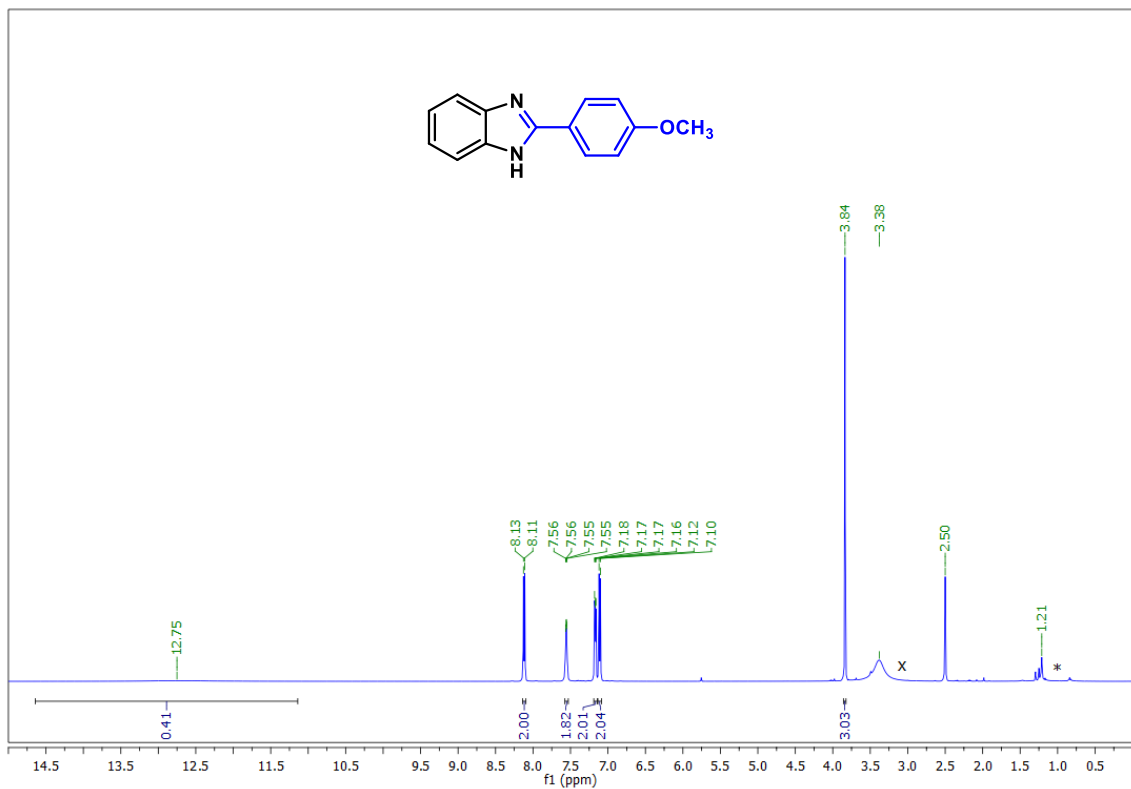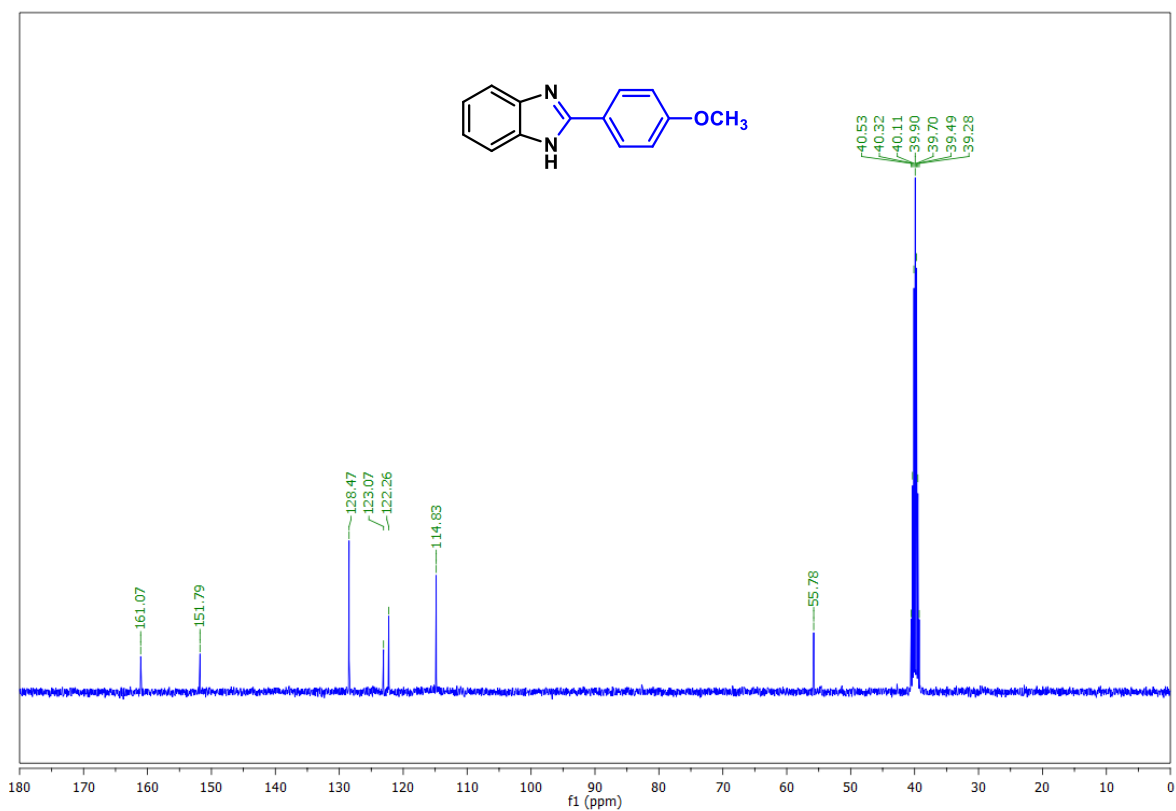

**Fig S6.** <sup>1</sup>H and <sup>13</sup>C NMR spectra of **5e** (in DMSO-d<sub>6</sub> solvent) (\*water,\*hexane).

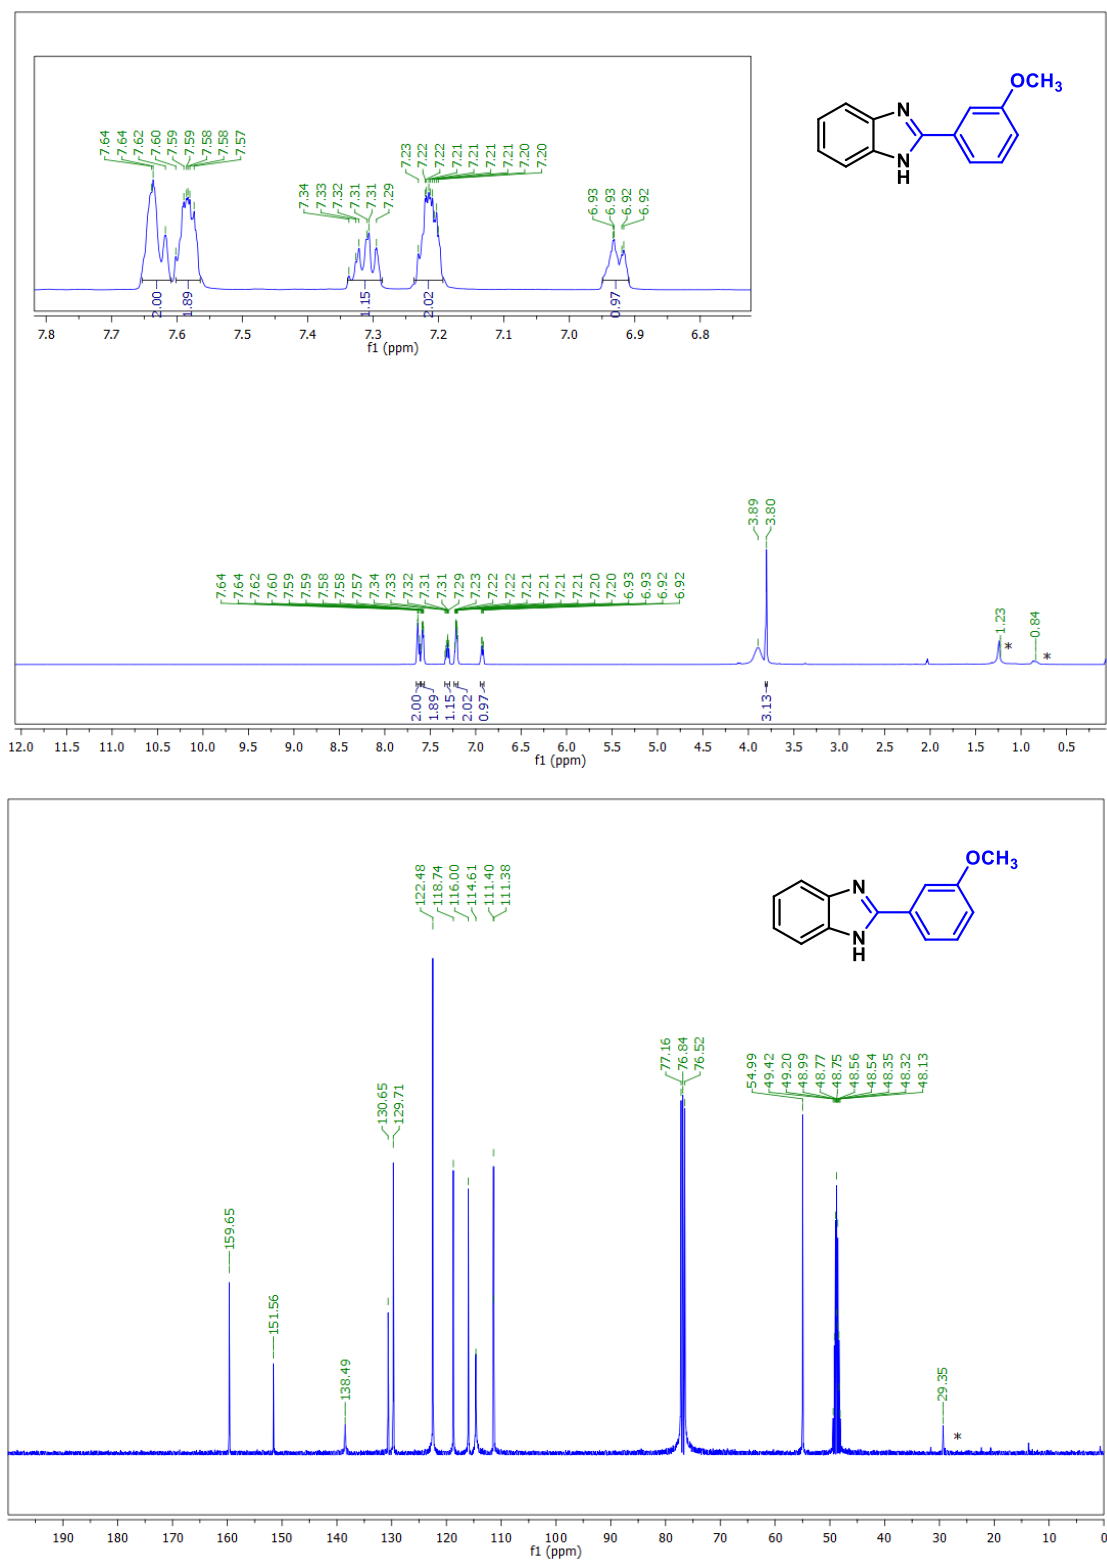

**Fig S7.** <sup>1</sup>H and <sup>13</sup>C NMR spectra of **5f** (in CDCl<sub>3</sub>+ 1 drop CD<sub>3</sub>OD solvent) (\*hexane).

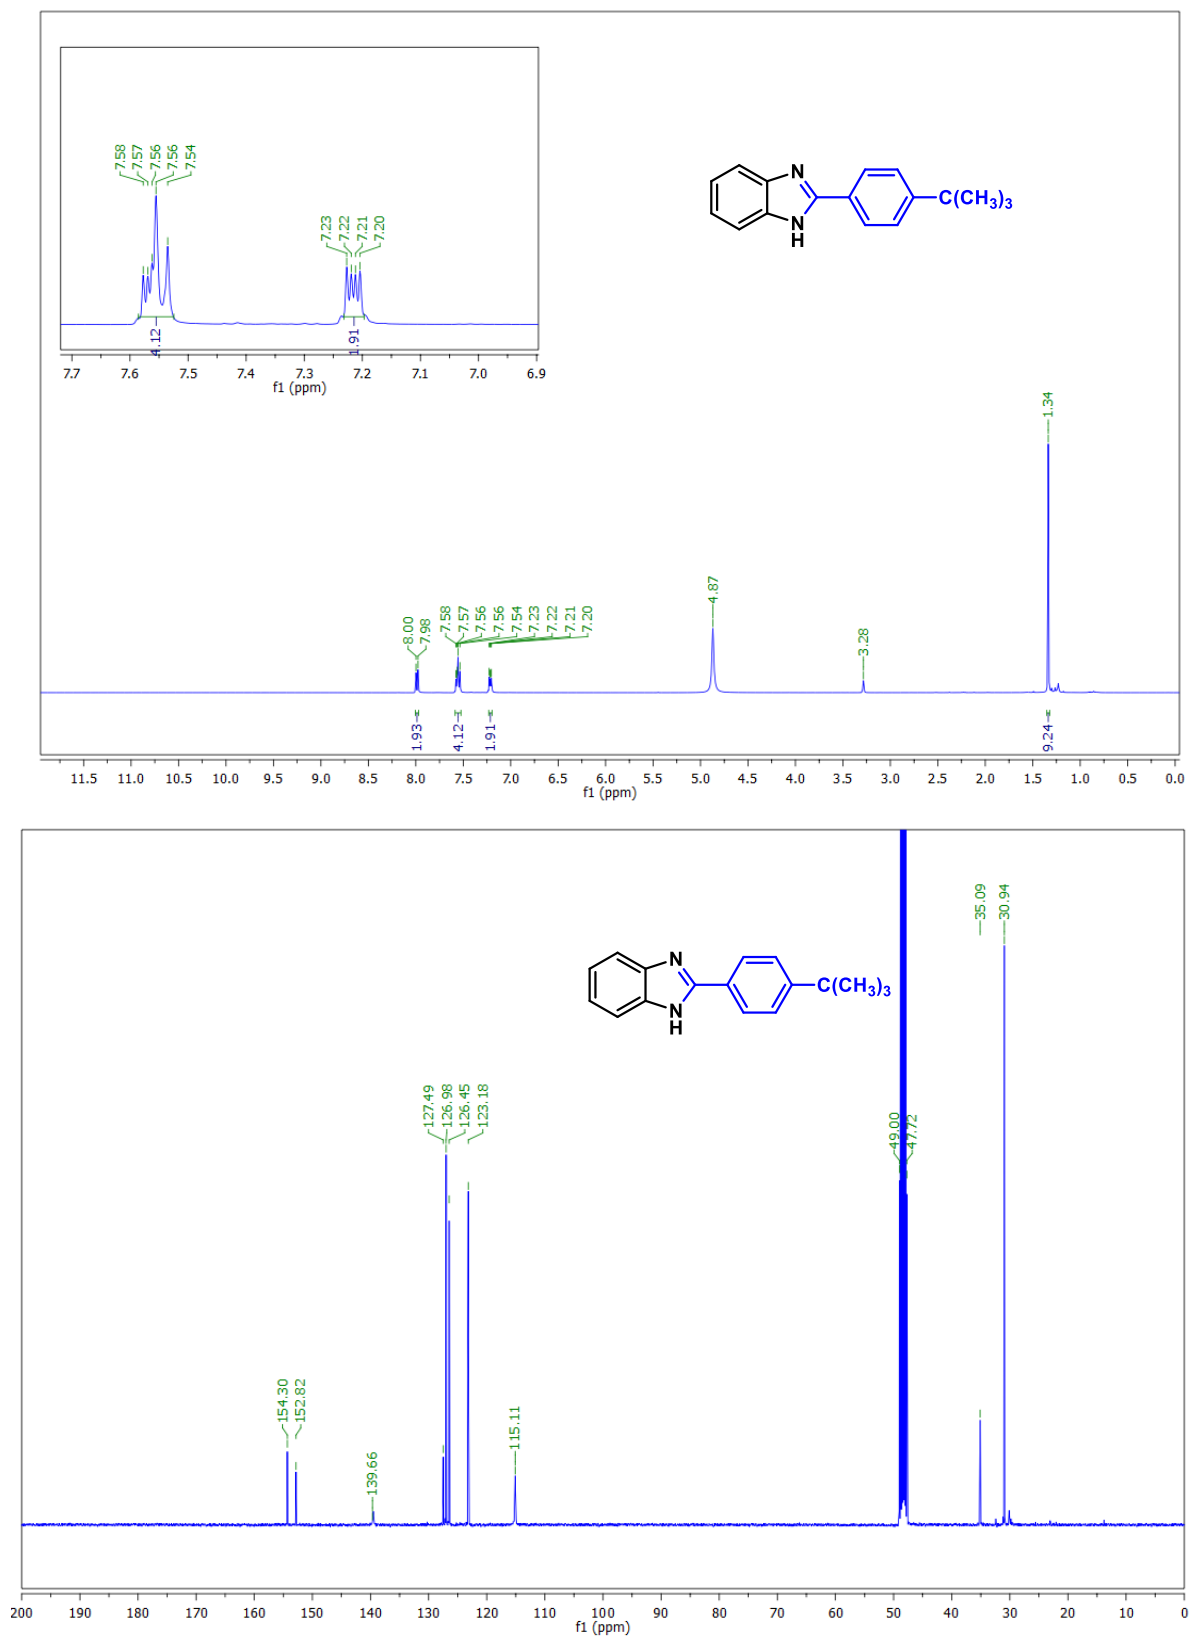

**Fig S8.**  $^1\text{H}$  and  $^{13}\text{C}$  NMR spectra of **5g** (in  $\text{CD}_3\text{OD}$  solvent).

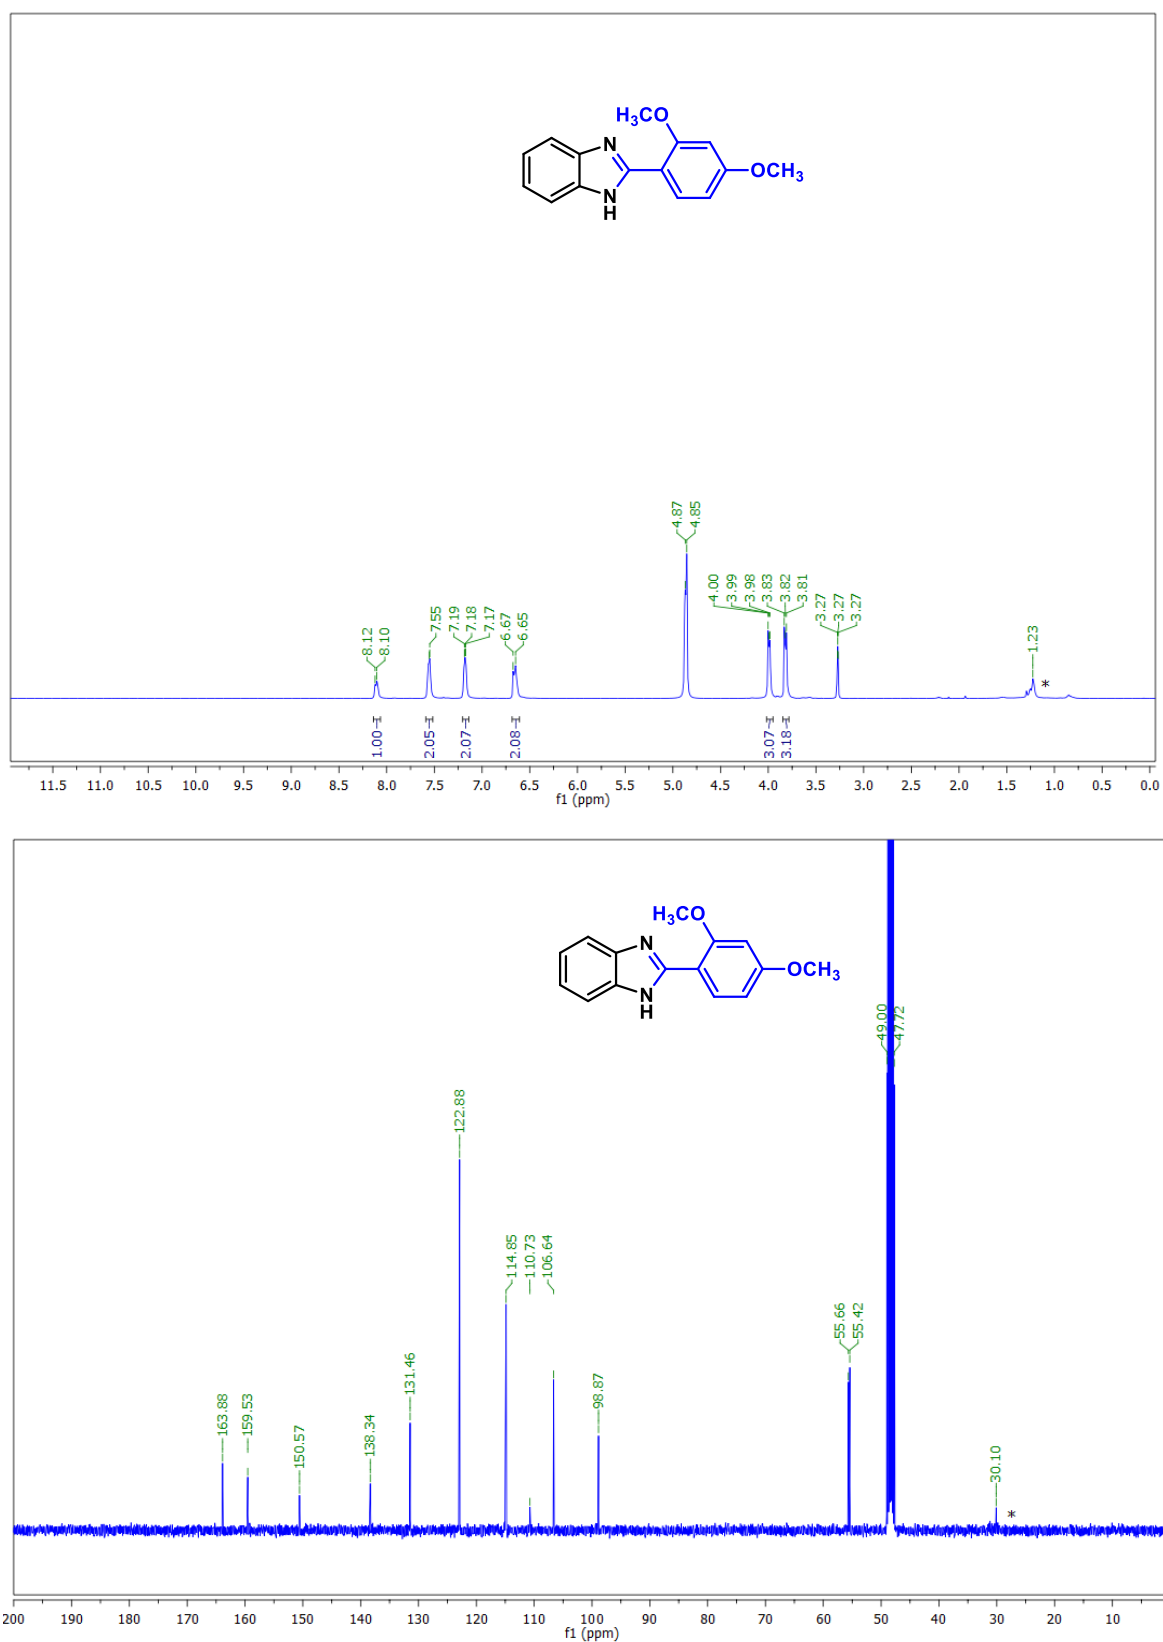

**Fig S9.** <sup>1</sup>H and <sup>13</sup>C NMR spectra of **5h** (in CD<sub>3</sub>OD solvent) (\*hexane).

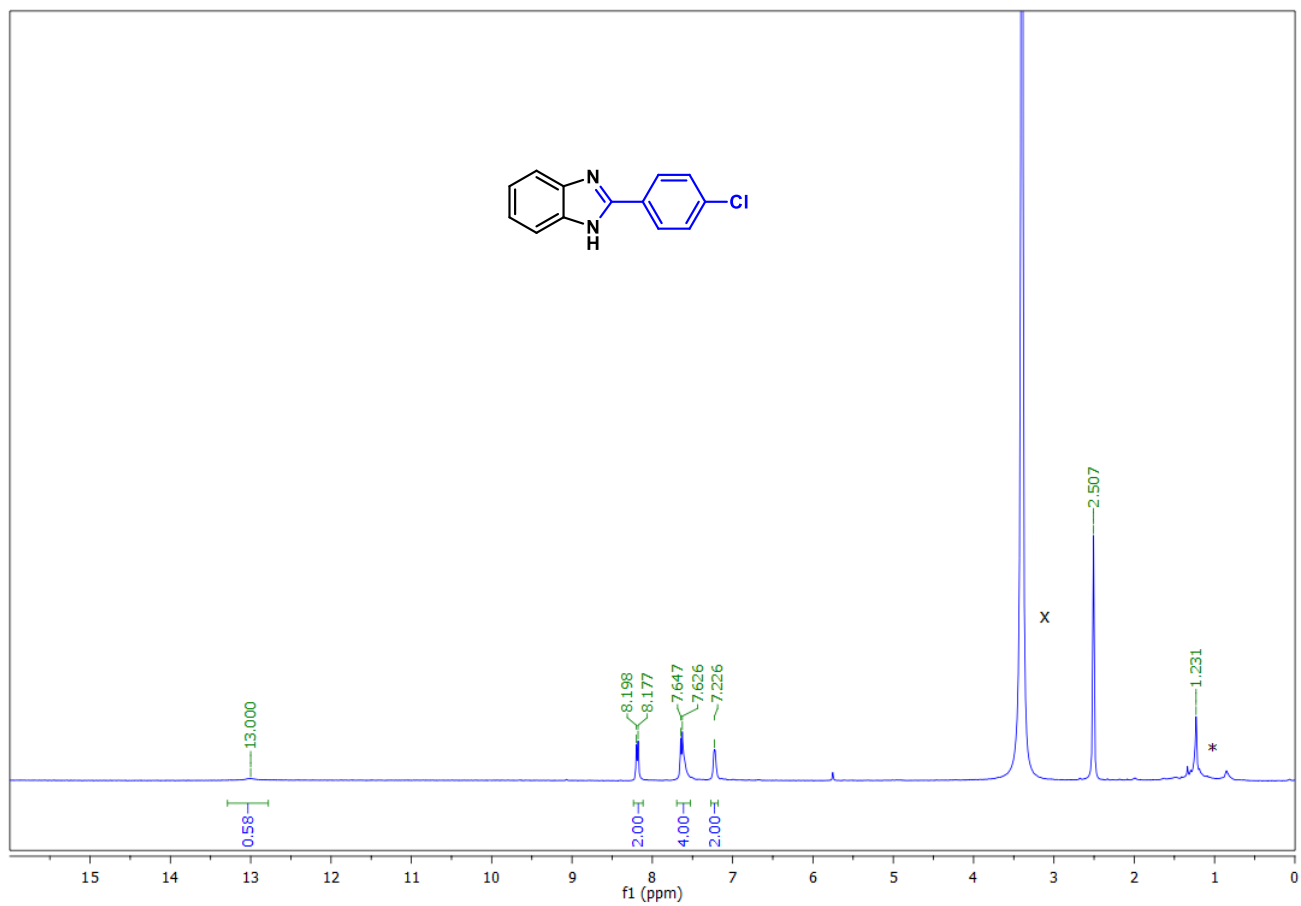

**Fig S10.** <sup>1</sup>H spectrum of **5i** (in DMSO-d<sub>6</sub> solvent) (xwater,\*hexane).

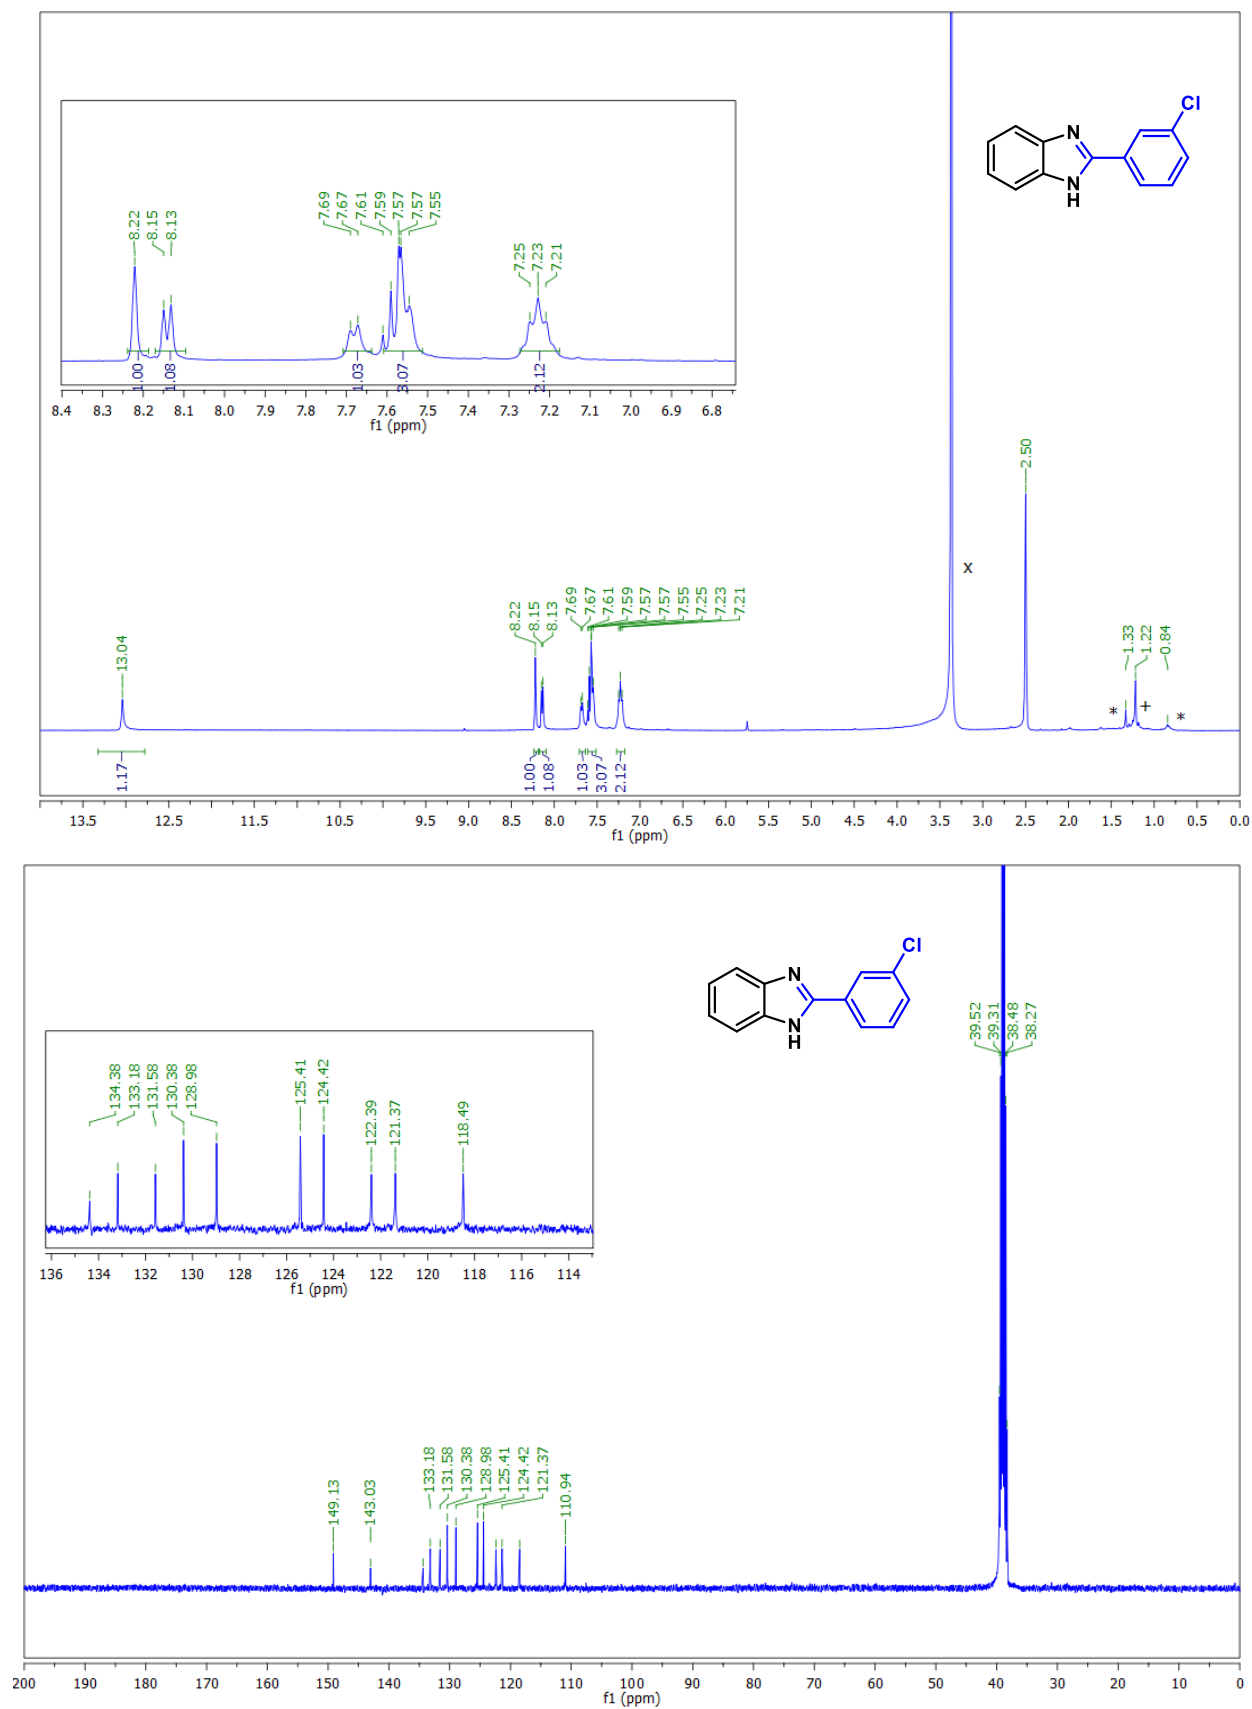

**Fig S11.** <sup>1</sup>H and <sup>13</sup>C NMR spectra of **5j** (in DMSO-d<sub>6</sub> solvent) (Xwater, \*hexane, +ethyl acetate).

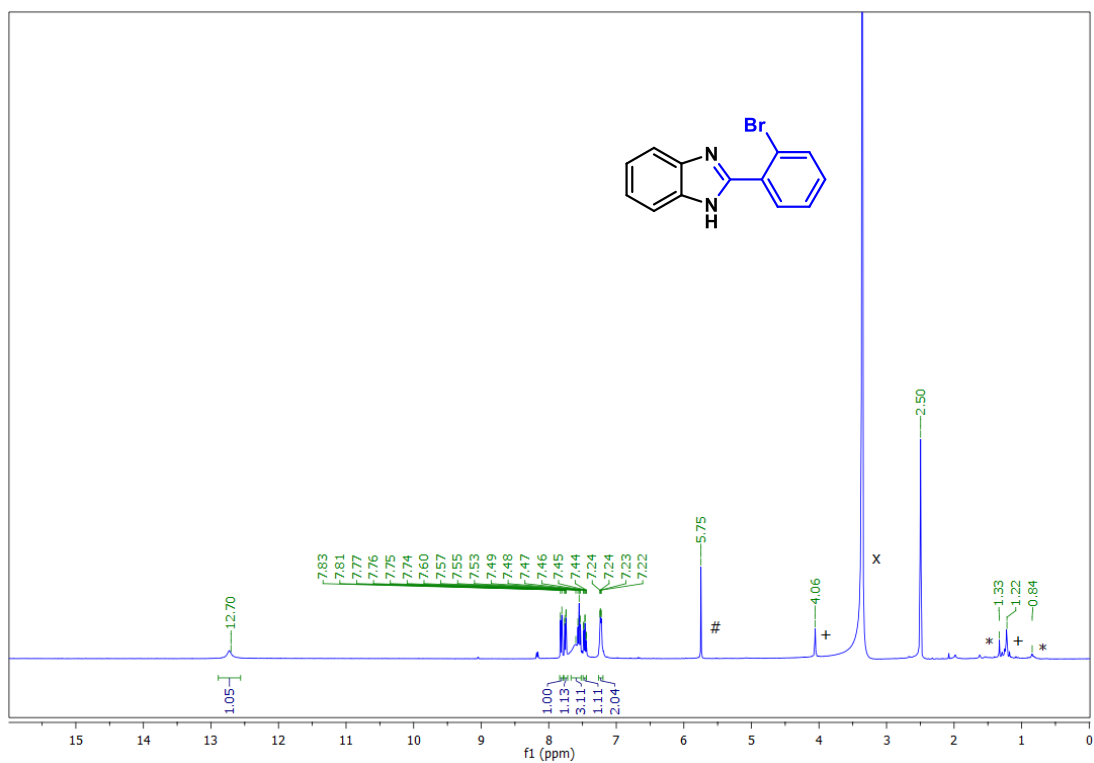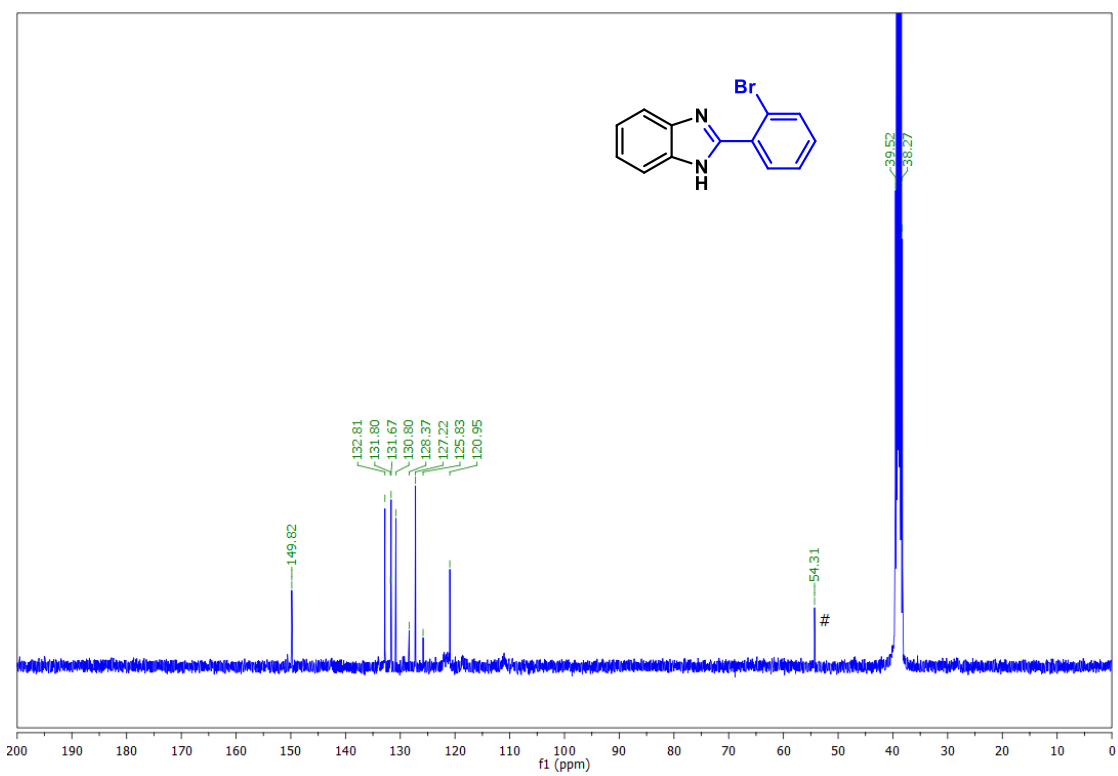

**Fig S12.** <sup>1</sup>H and <sup>13</sup>C NMR spectra of **5k** (in DMSO-d<sub>6</sub> solvent) (#dichloromethane, +ethyl acetate, xwater, \*hexane).

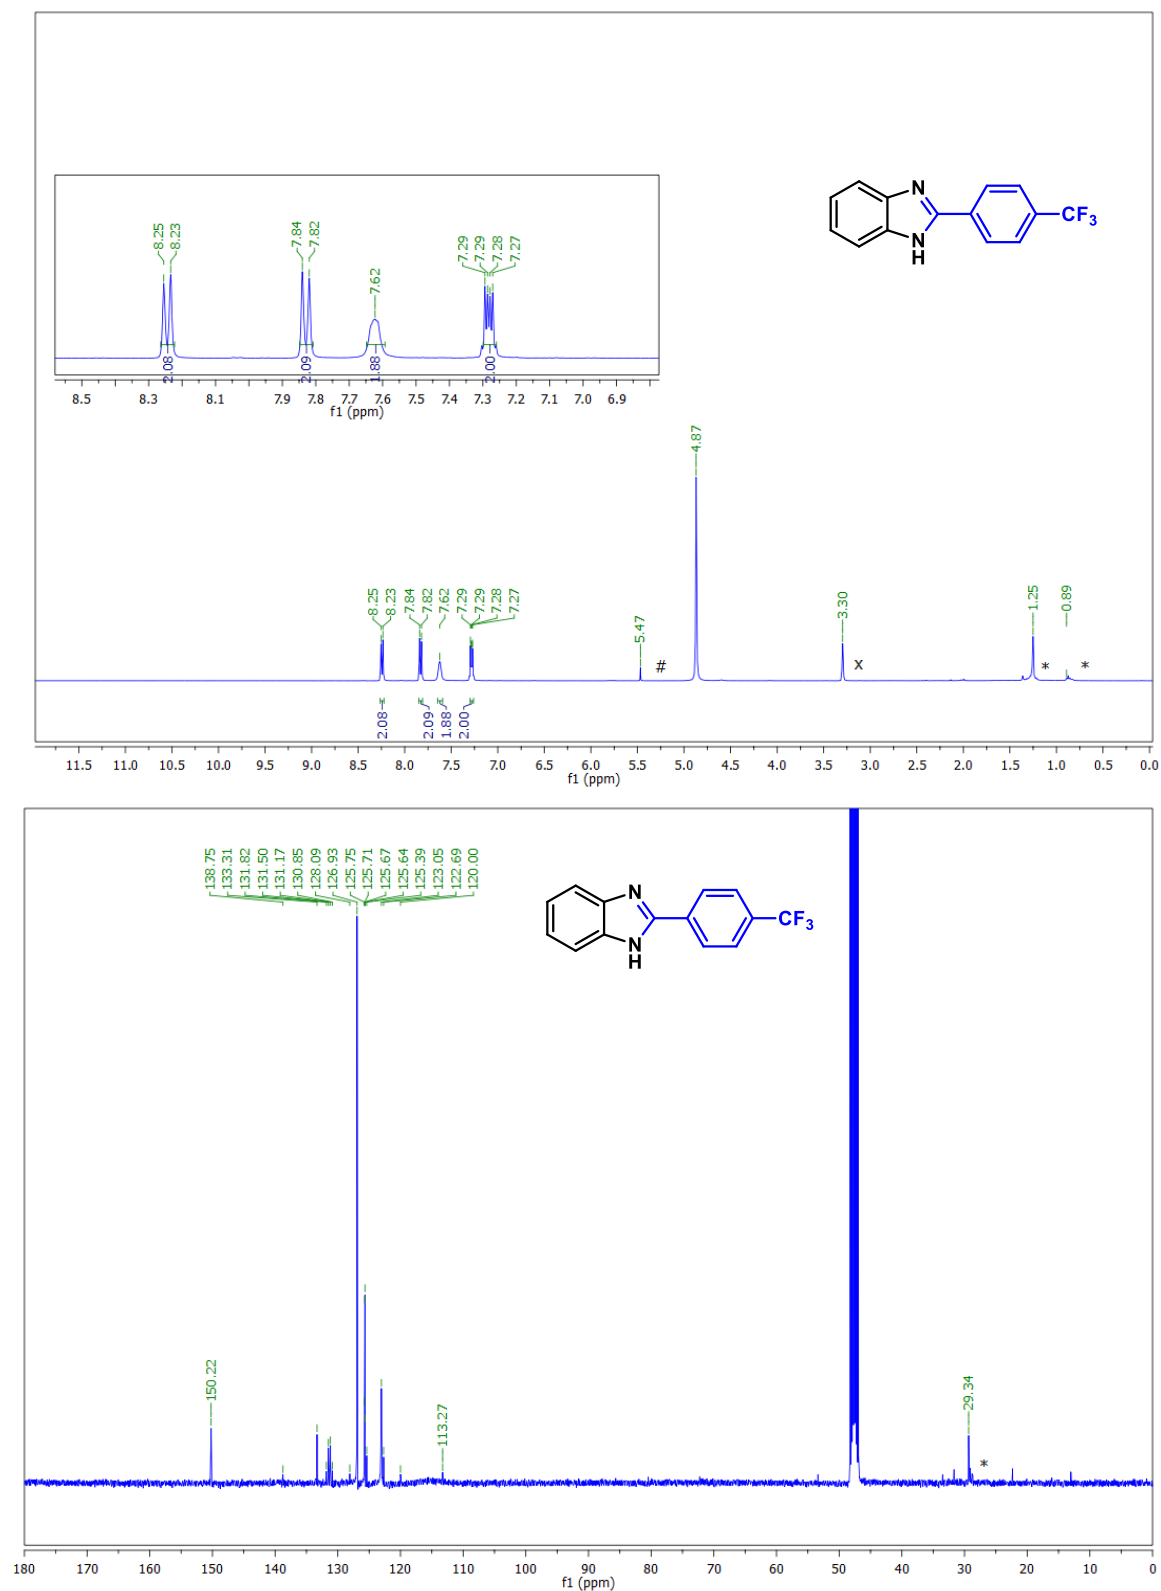

**Fig S13.**  $^1\text{H}$  and  $^{13}\text{C}$  NMR spectra of **51** (in  $\text{CD}_3\text{OD}$  solvent) (#dichloromethane,  $^x$ water,  $^*$ hexane).



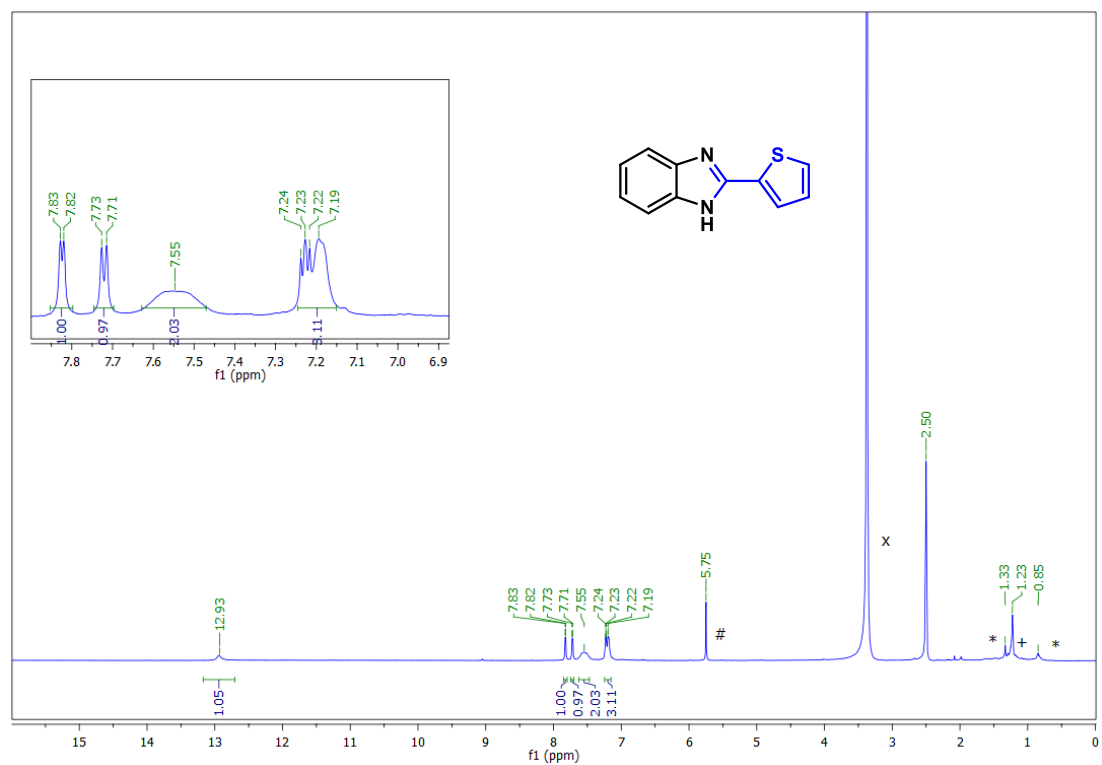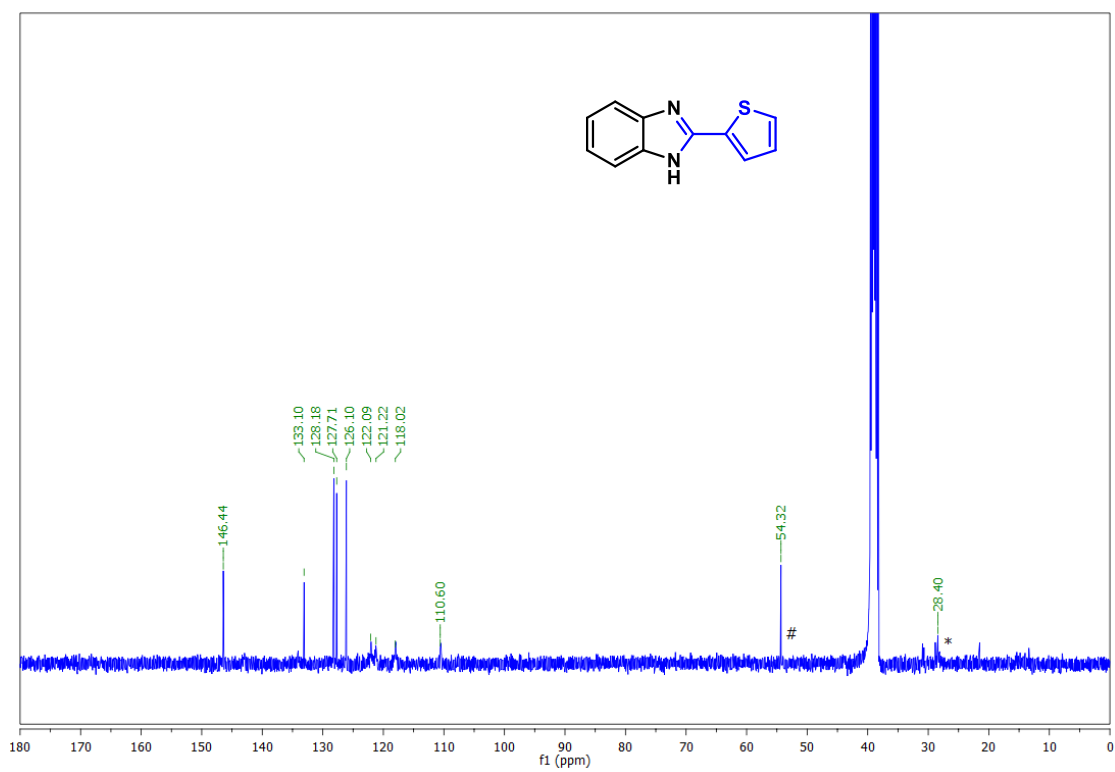

**Fig S14.** <sup>1</sup>H and <sup>13</sup>C NMR spectra of **5m** (in DMSO-d<sub>6</sub> solvent) (# dichloromethane, + ethyl acetate, <sup>x</sup>water, \*hexane).

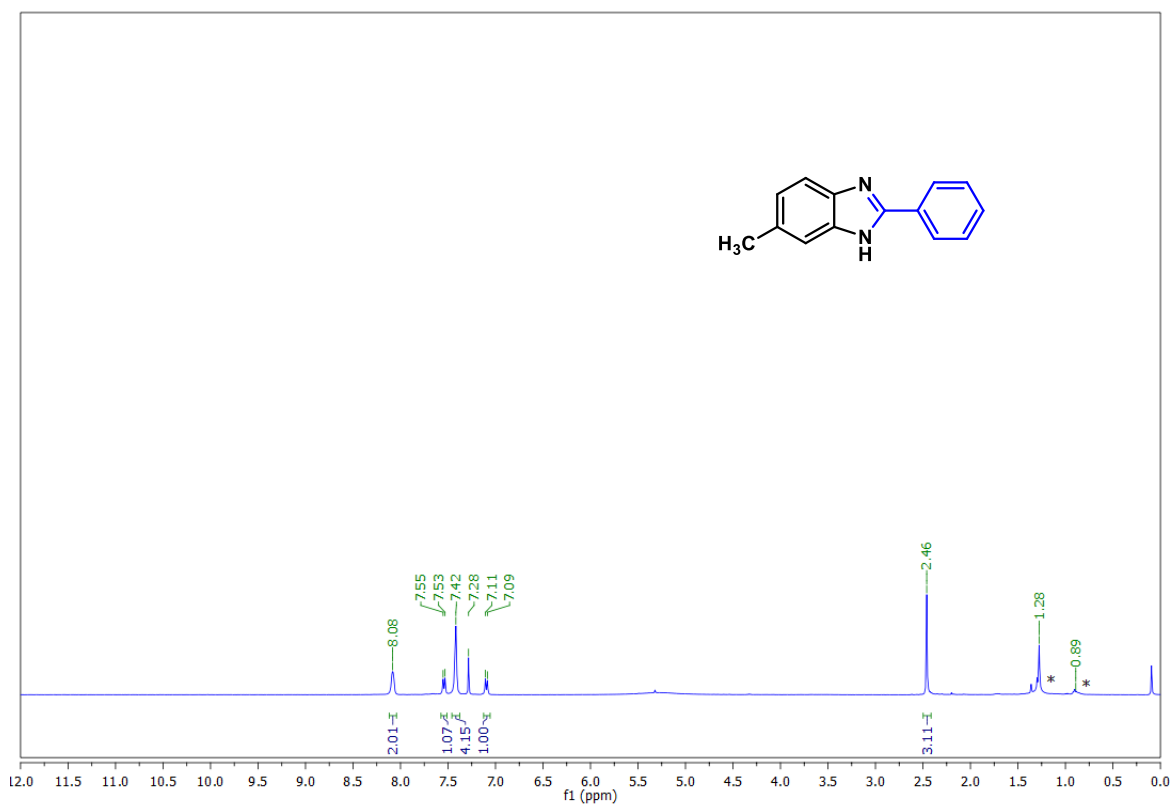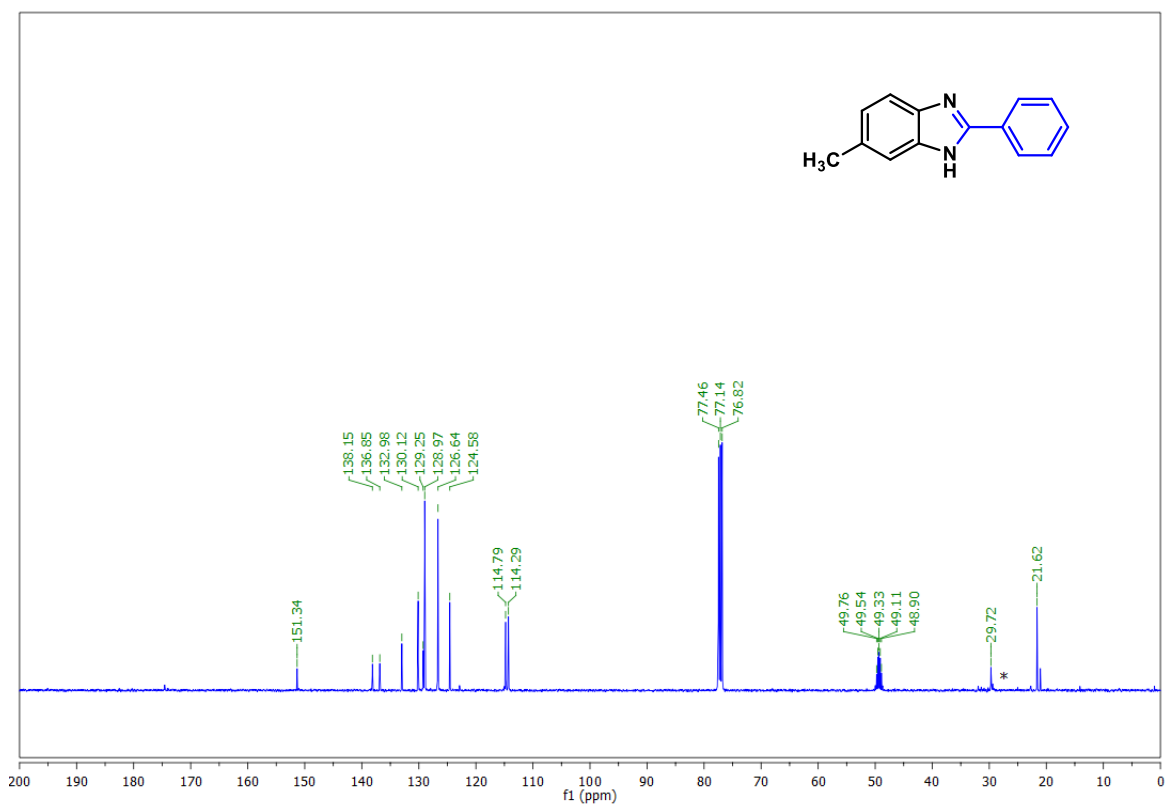

**Fig S15.** <sup>1</sup>H and <sup>13</sup>C NMR spectra of **5n** (in CDCl<sub>3</sub> and CDCl<sub>3</sub>+1 drop CD<sub>3</sub>OD solvent) (\*hexane).

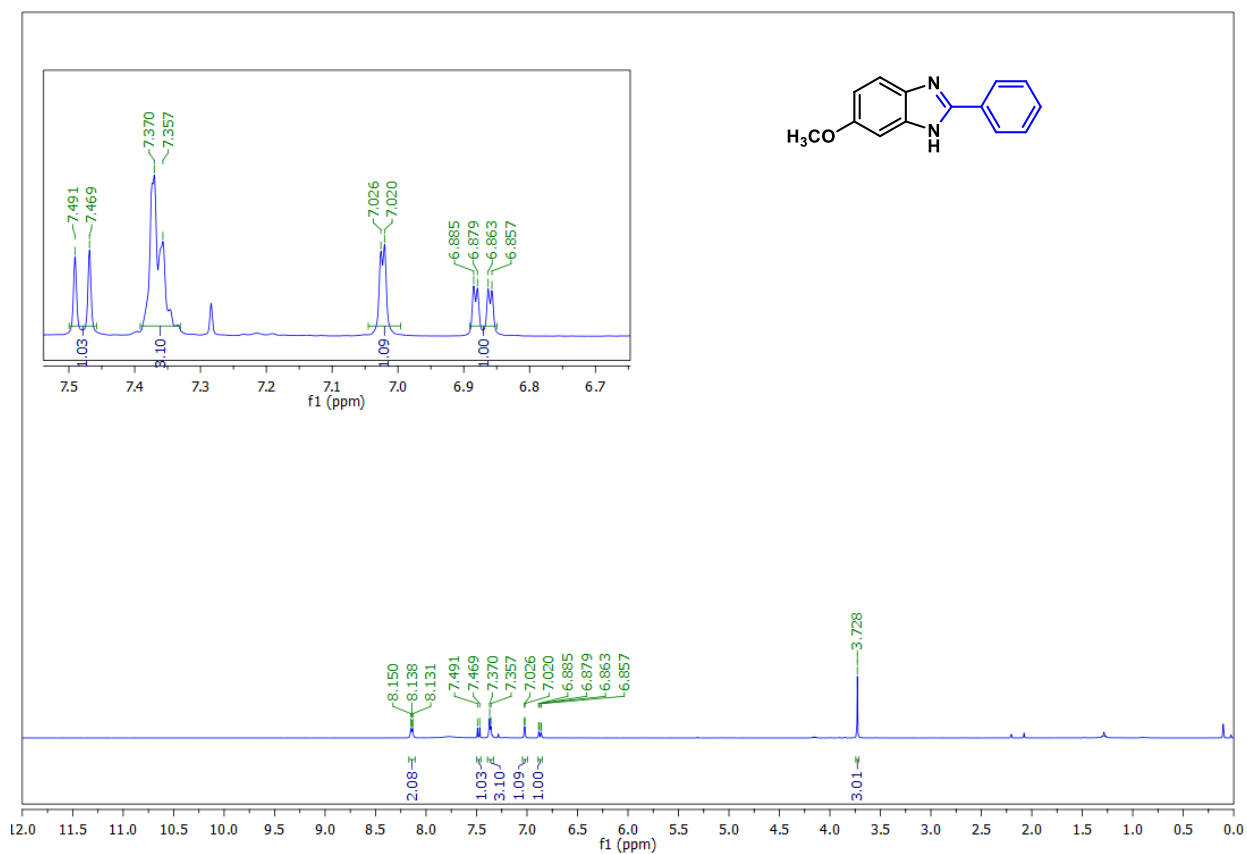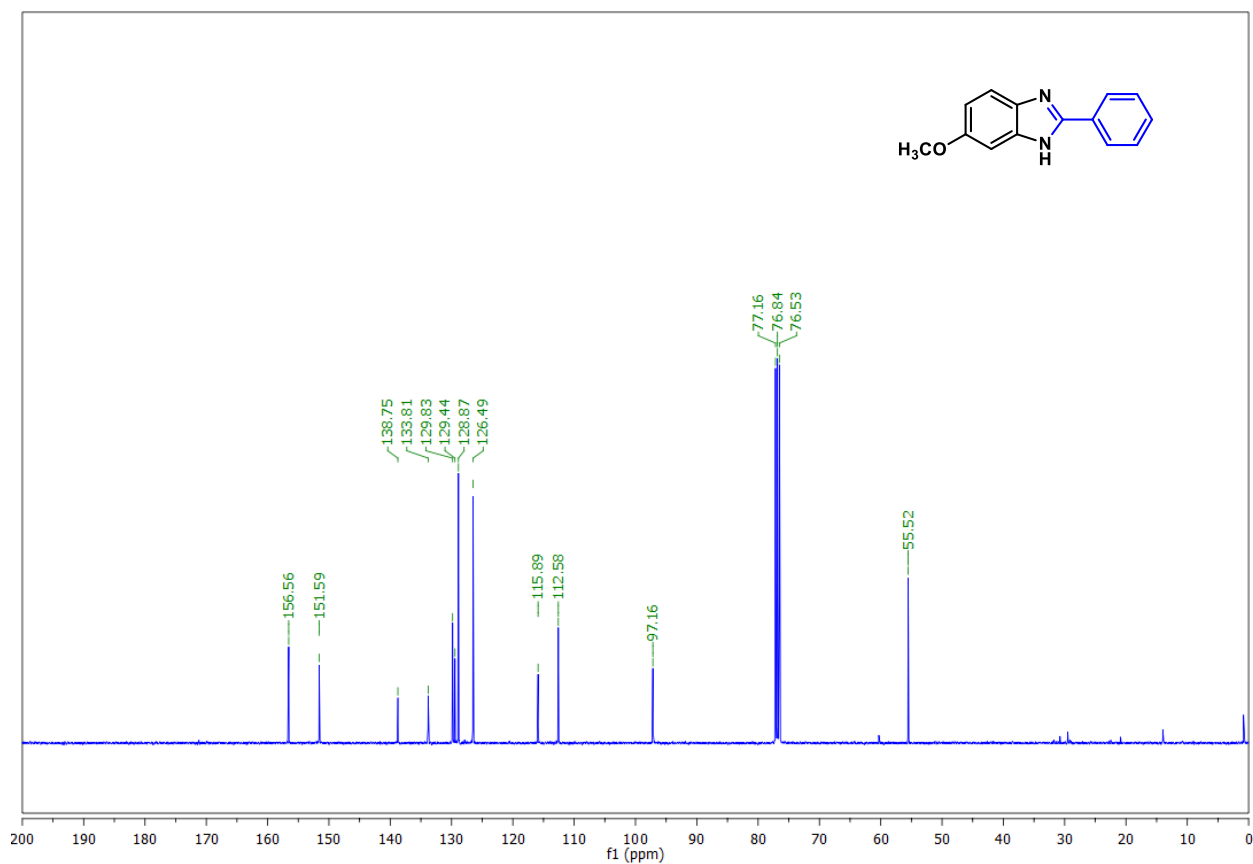

**Fig S16.**  $^1\text{H}$  and  $^{13}\text{C}$  NMR spectra of **5o** (in  $\text{CDCl}_3$  solvent).

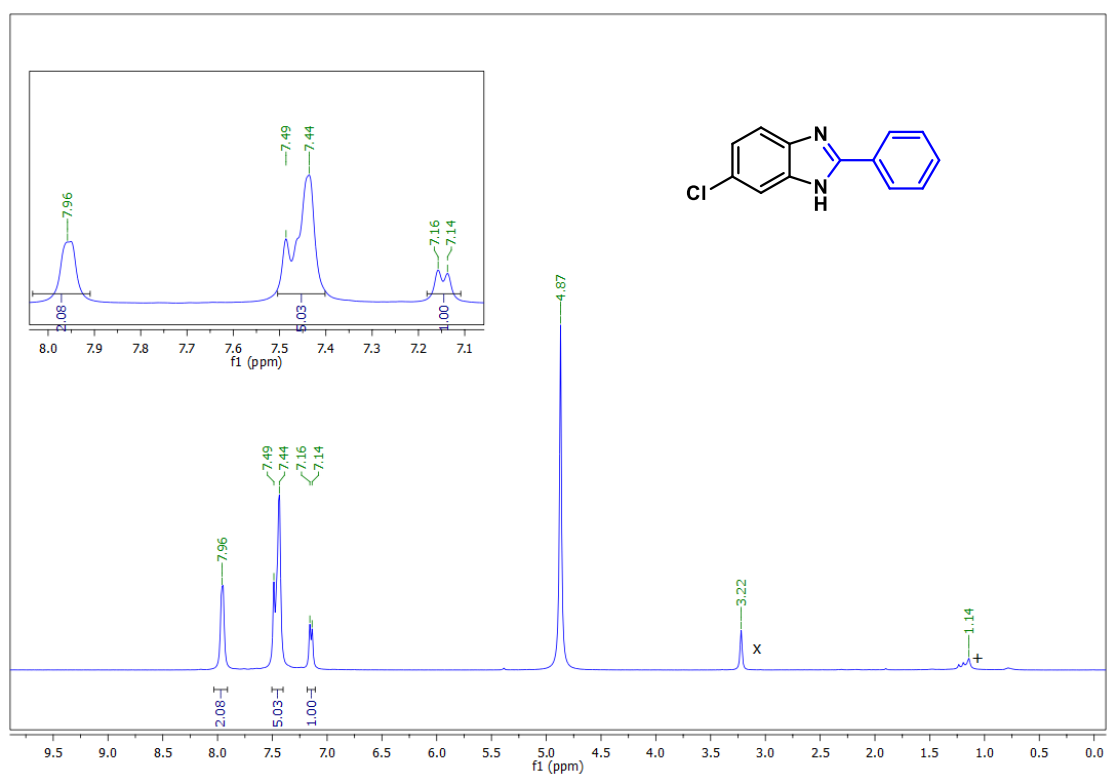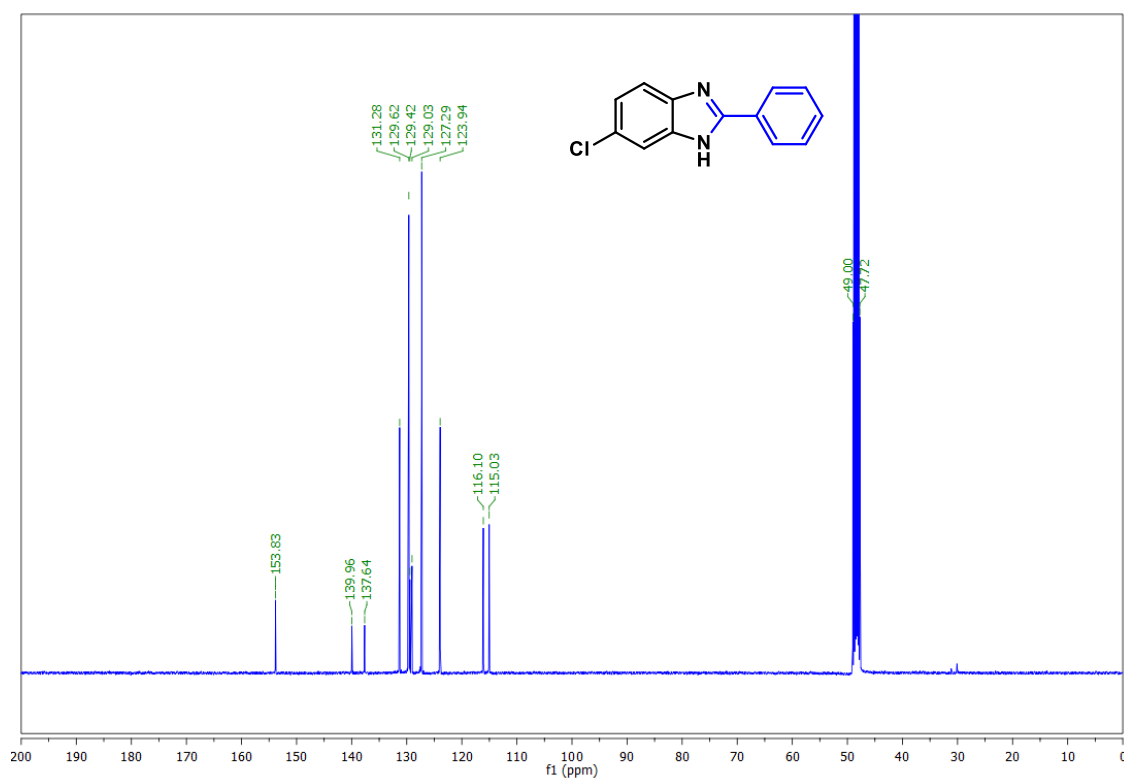

**Fig S17.** <sup>1</sup>H and <sup>13</sup>C NMR spectra of **5p** (in CD<sub>3</sub>OD solvent) (+ethyl acetate, <sup>x</sup>water).

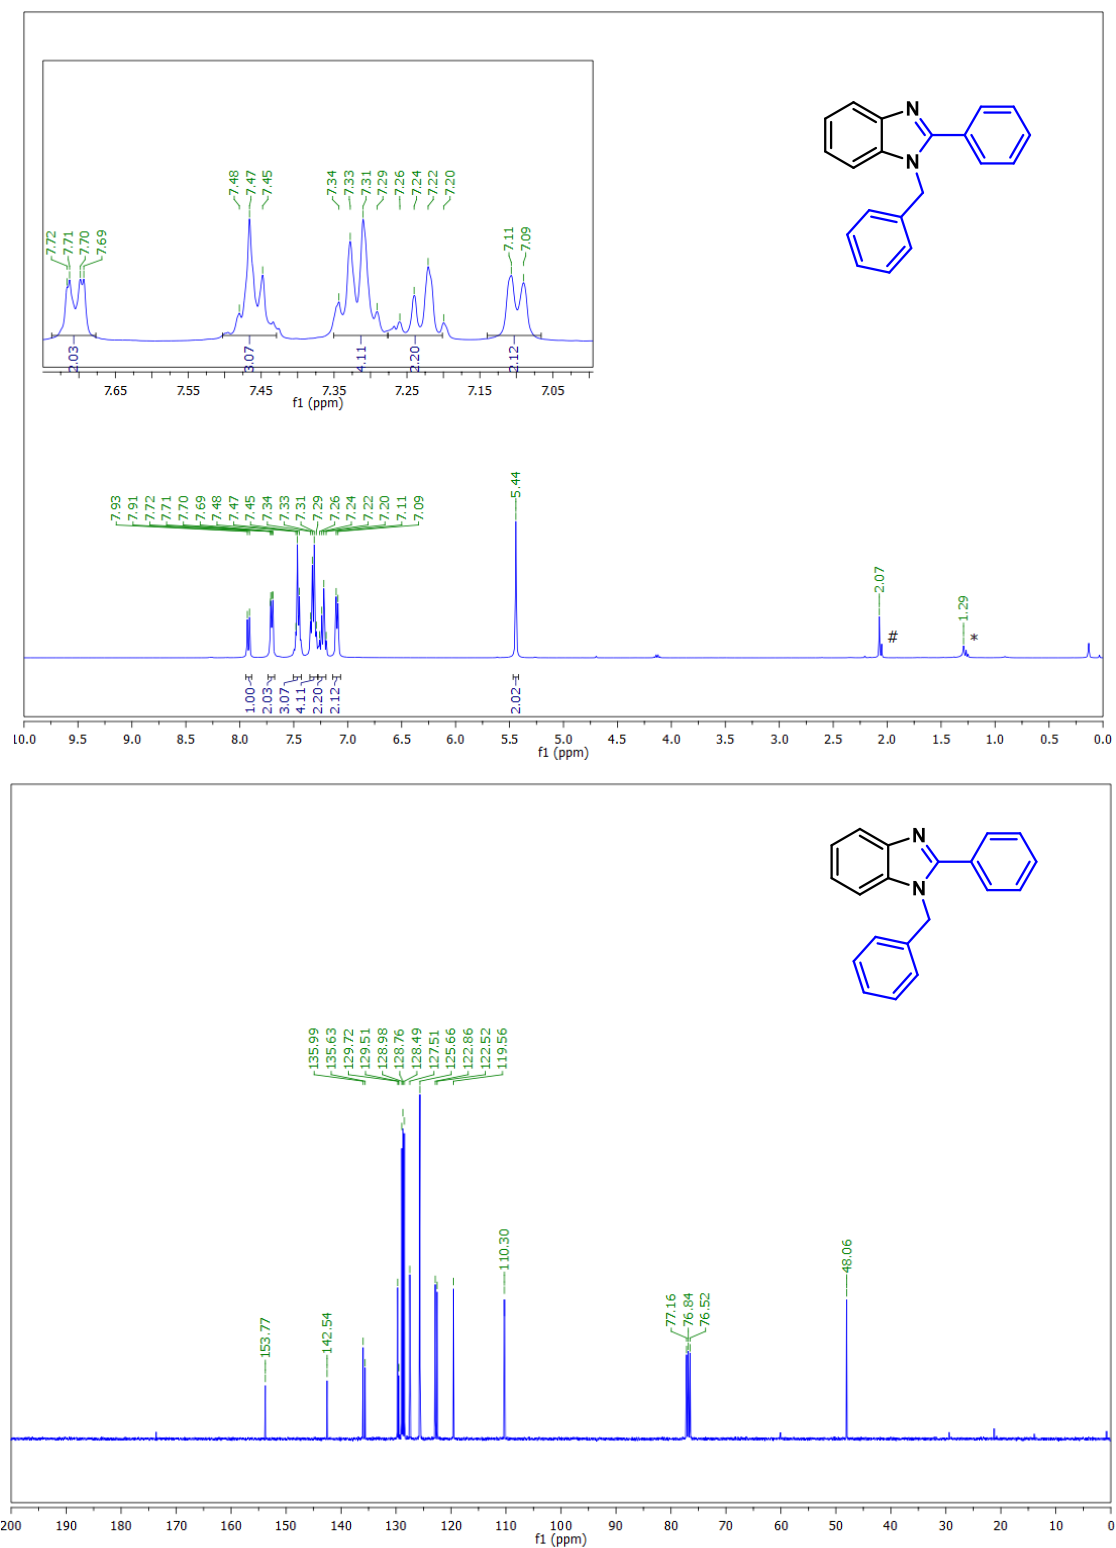

**Fig S18.**  $^1\text{H}$  and  $^{13}\text{C}$  NMR spectra of **6a** (in  $\text{CDCl}_3$  solvent) (#acetone, \*hexane).

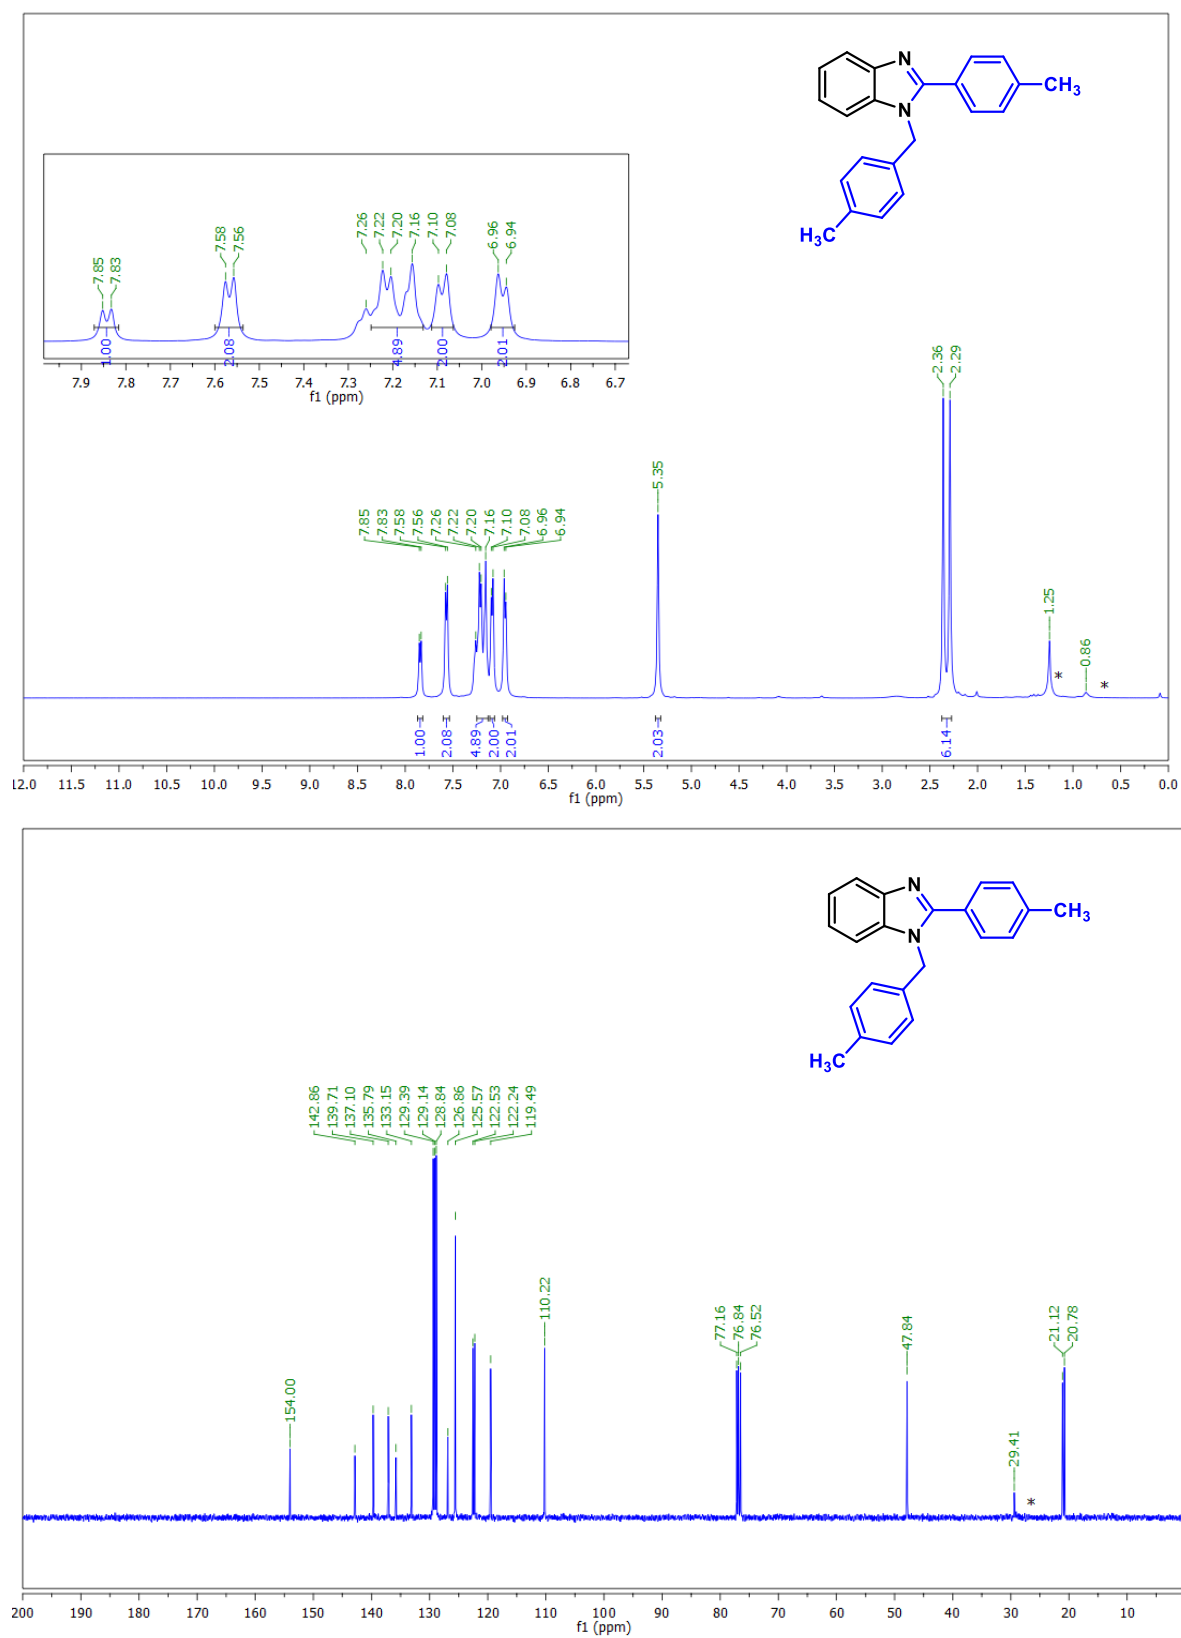

**Fig S19.** <sup>1</sup>H and <sup>13</sup>C NMR spectra of **6b** (in CDCl<sub>3</sub> solvent) (\*hexane).

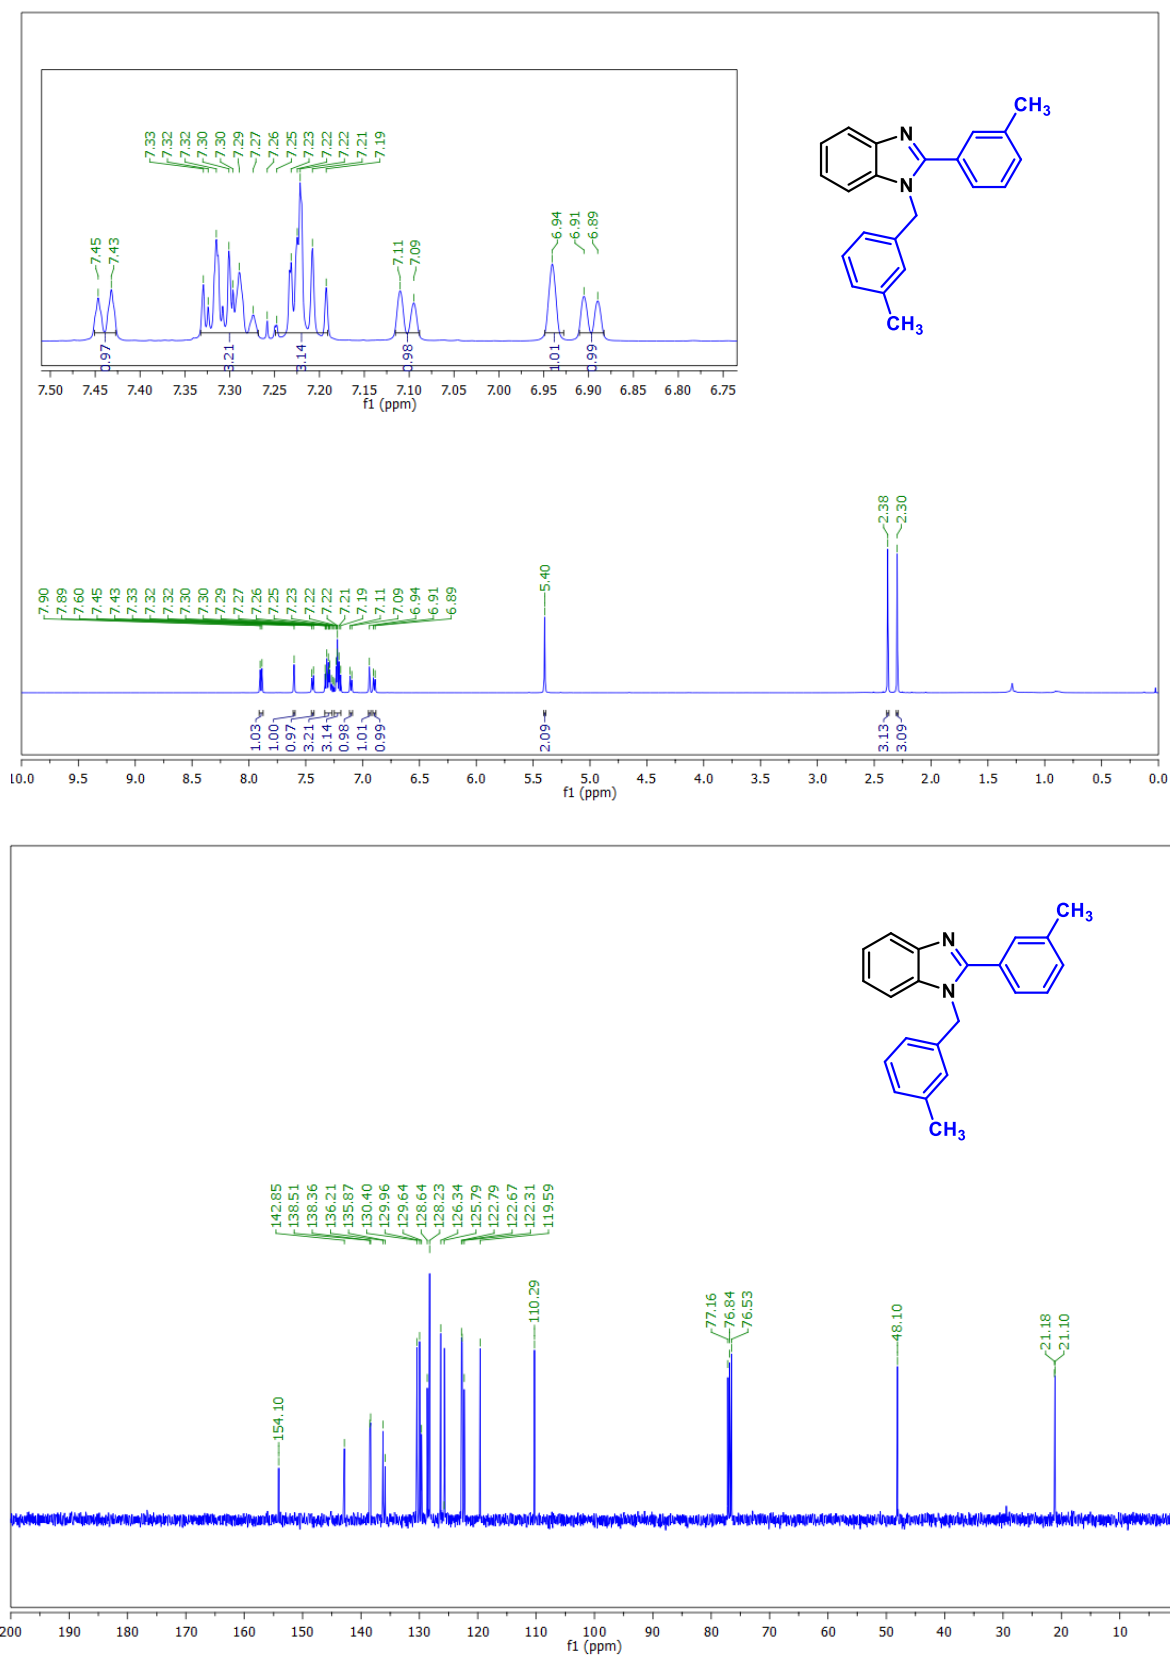

**Fig S20.**  $^1\text{H}$  and  $^{13}\text{C}$  NMR spectra of **6c** (in  $\text{CDCl}_3$  solvent).

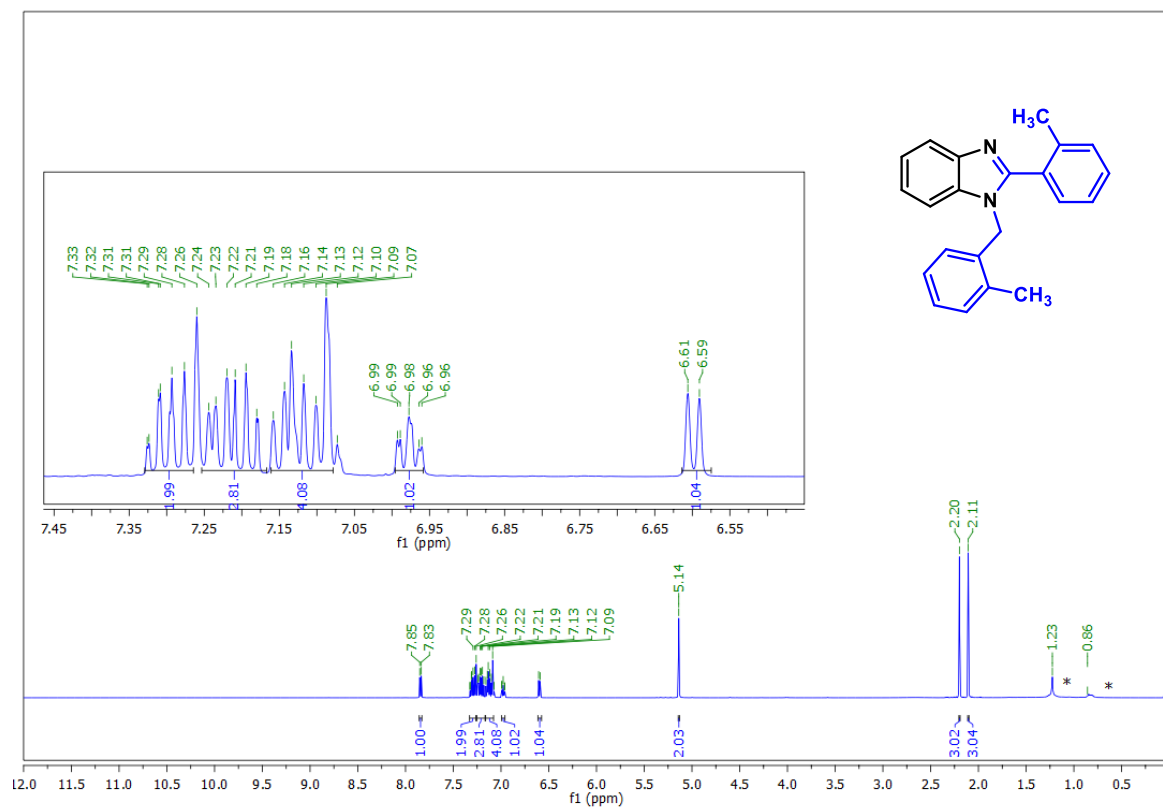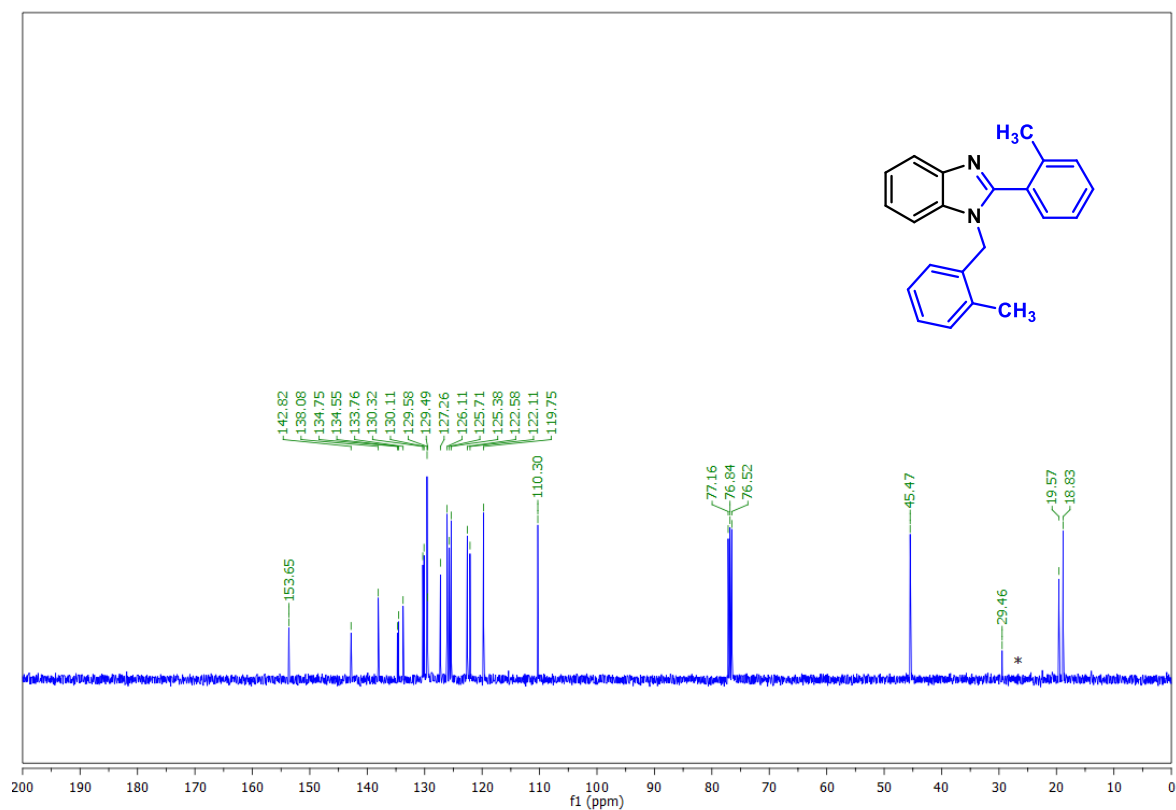

**Fig S21.** <sup>1</sup>H and <sup>13</sup>C NMR spectra of **6d** (in CDCl<sub>3</sub> solvent) (\*hexane).



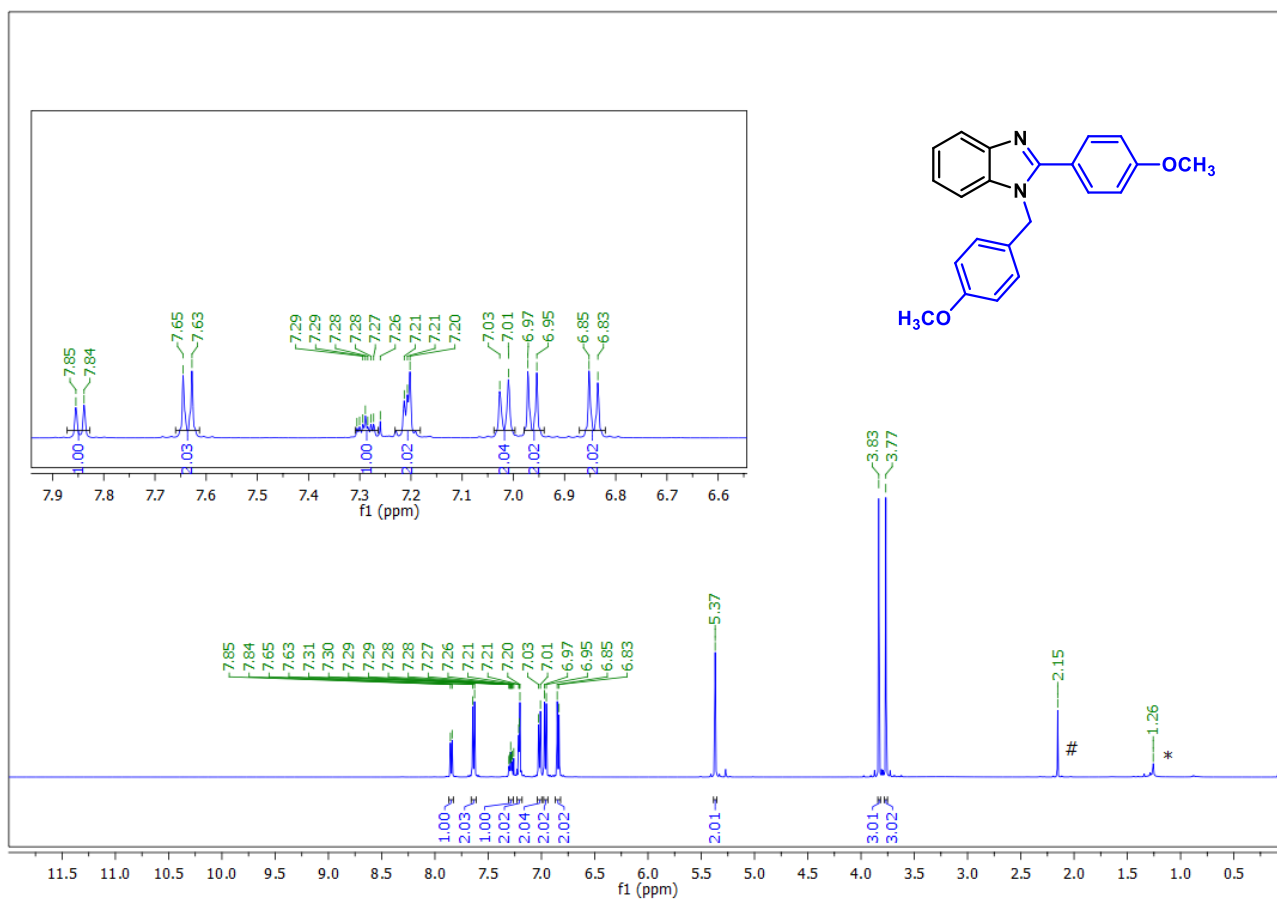

**Fig S22.** <sup>1</sup>H NMR spectrum of **6e** (in CDCl<sub>3</sub> solvent) (# acetone, \*hexane).

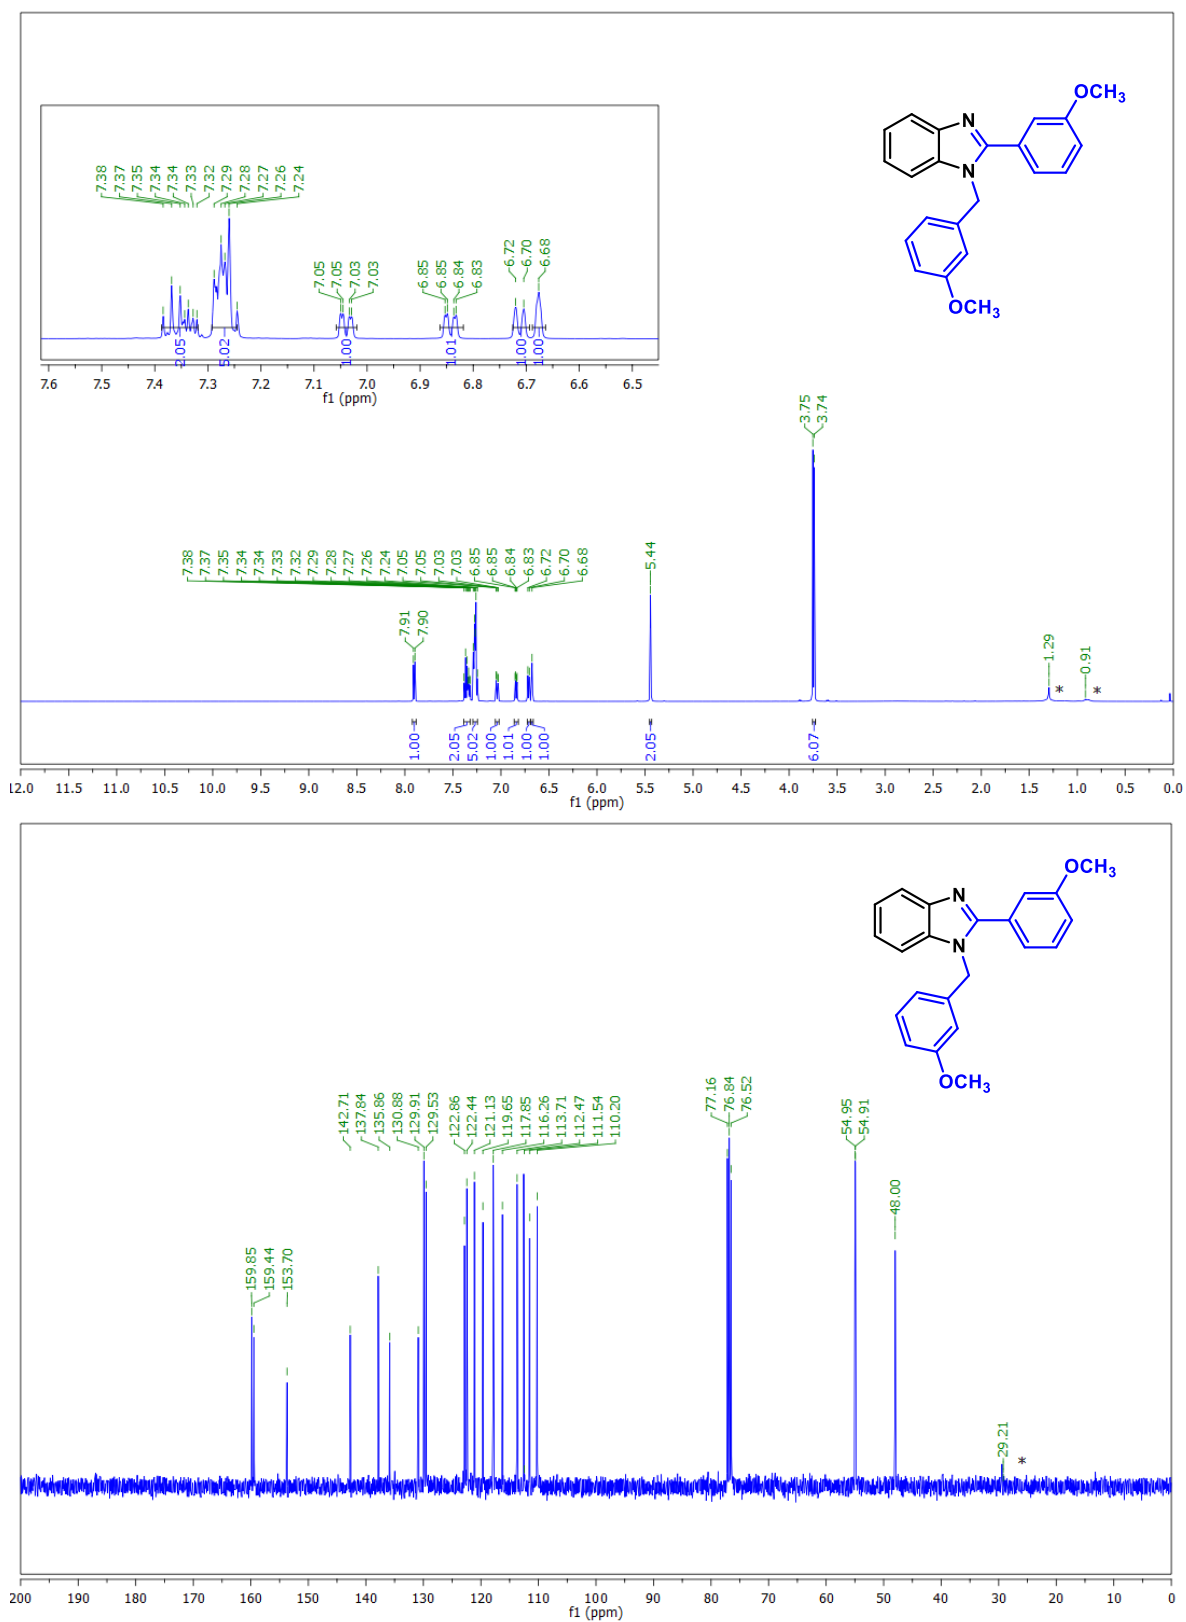

**Fig S23.**  $^1\text{H}$  and  $^{13}\text{C}$  NMR spectra of **6f** (in  $\text{CDCl}_3$  solvent) (\*hexane).

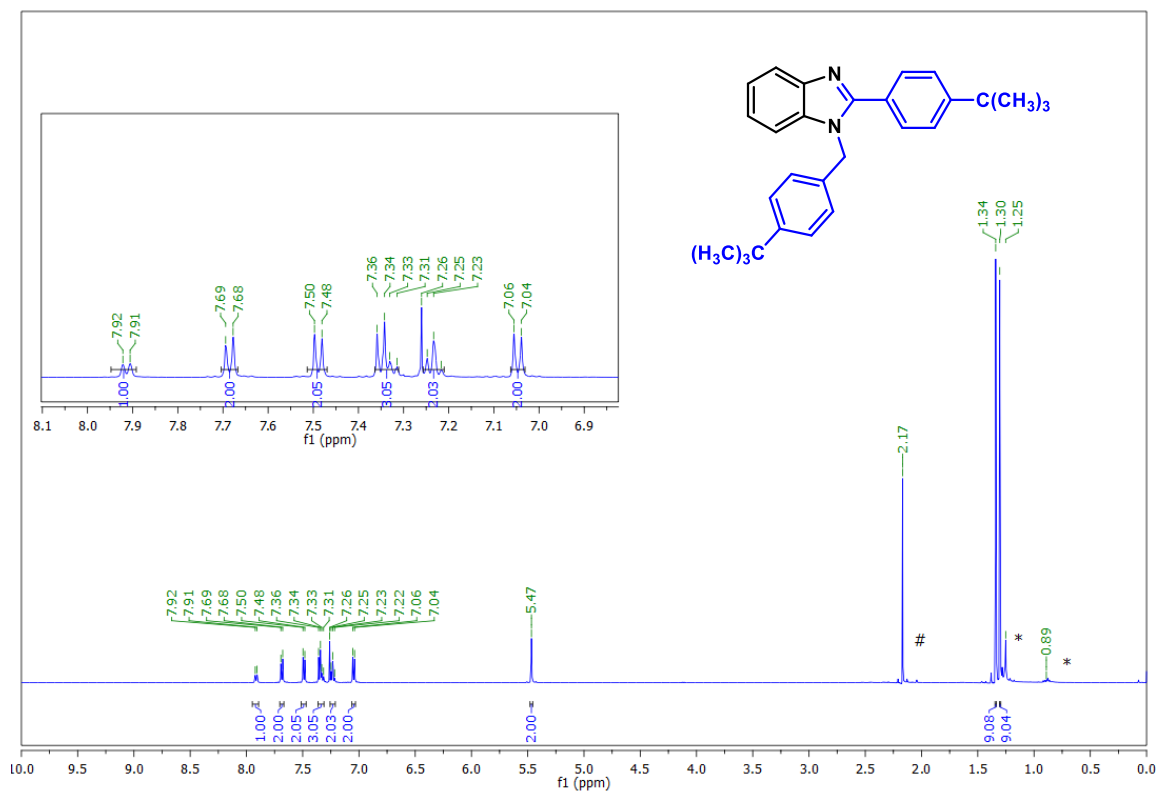

**Fig S24.**  $^1\text{H}$  NMR spectrum of **6g** (in  $\text{CDCl}_3$  solvent) (#acetone, \*hexane).

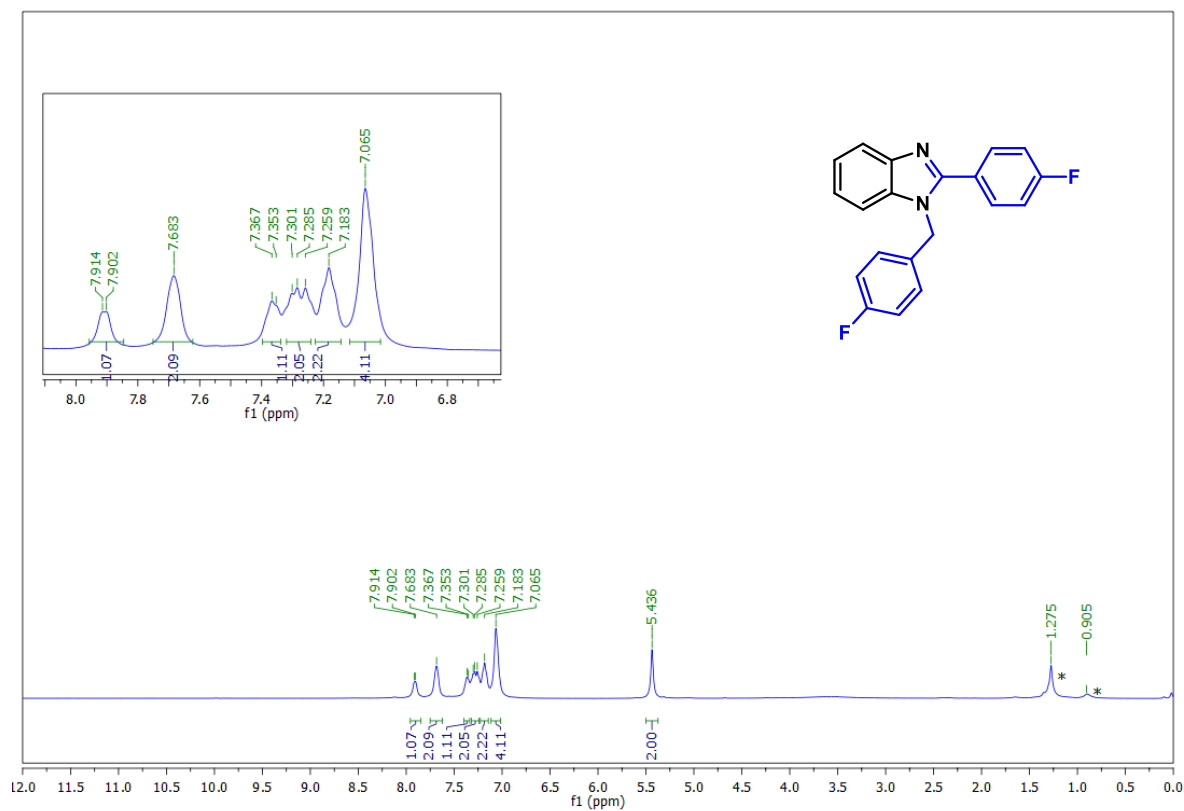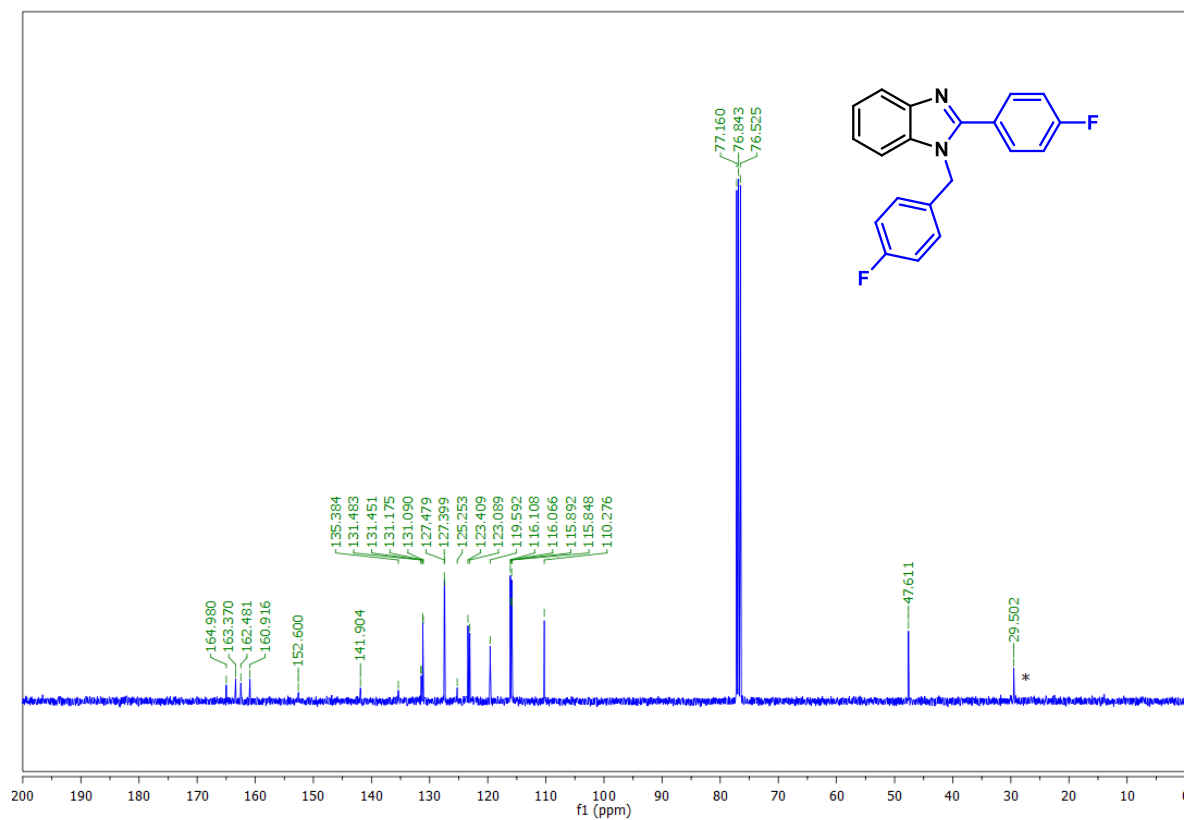

**Fig S25.** <sup>1</sup>H and <sup>13</sup>C NMR spectra of **6h** (in CDCl<sub>3</sub> solvent) (\*hexane).

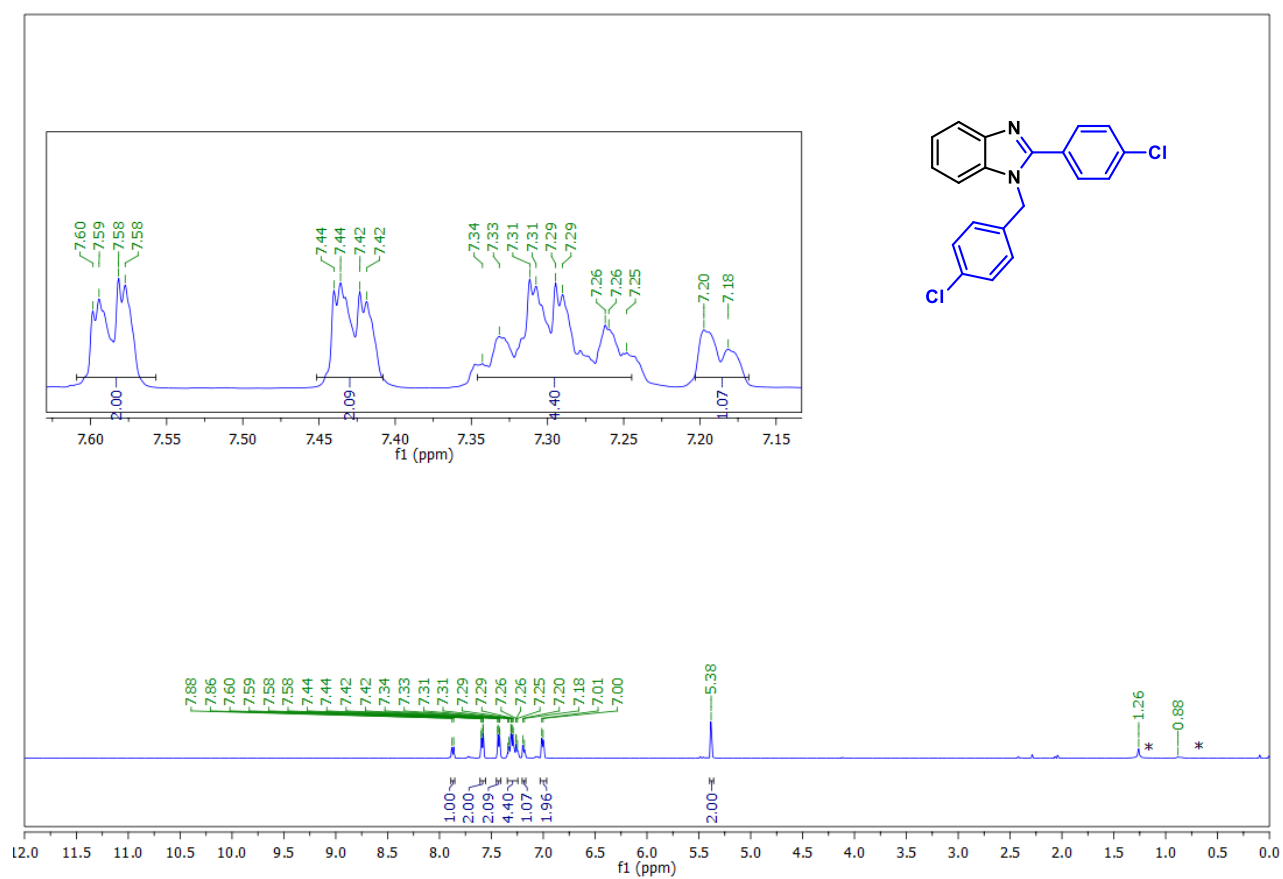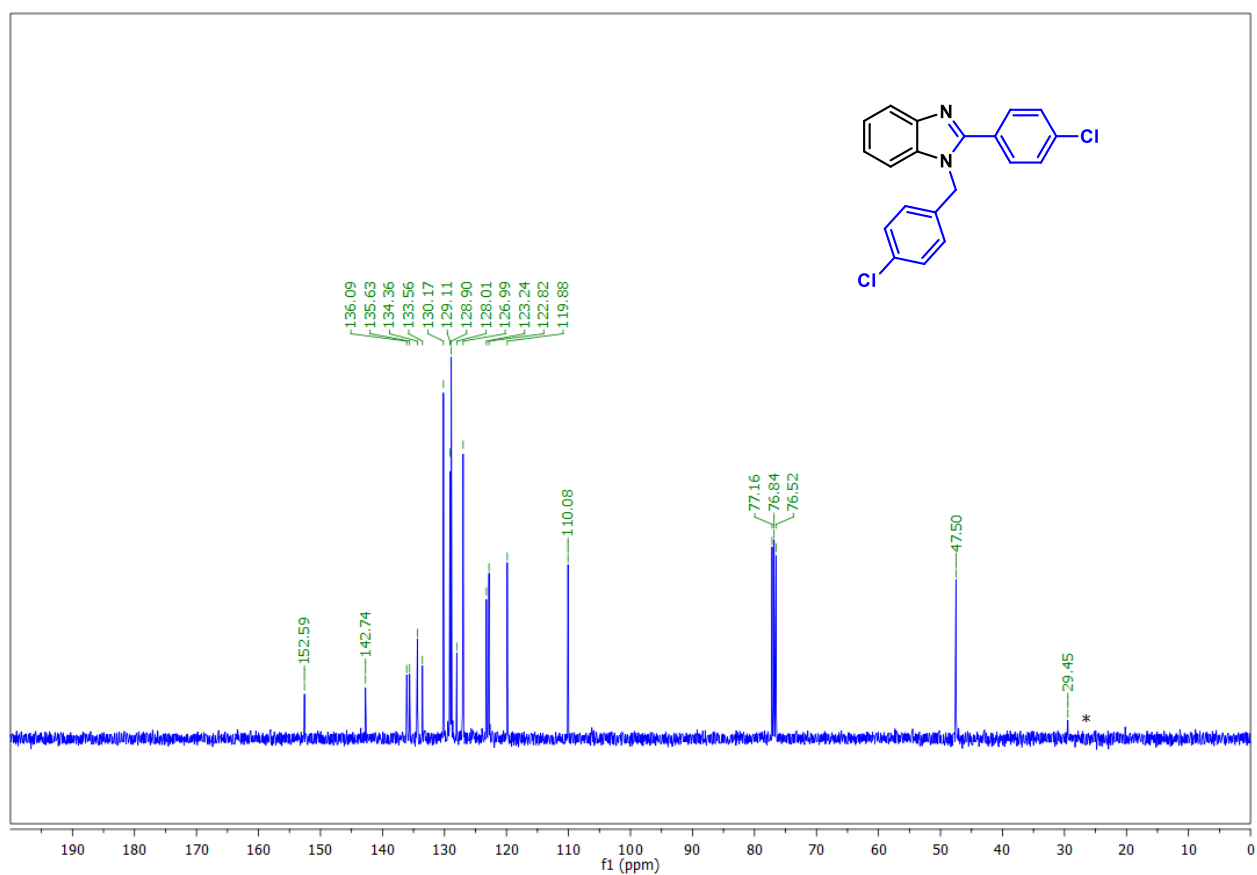

**Fig S26.** <sup>1</sup>H and <sup>13</sup>C NMR spectra of **6i** (in CDCl<sub>3</sub> solvent) (\*<sup>1</sup>hexane).

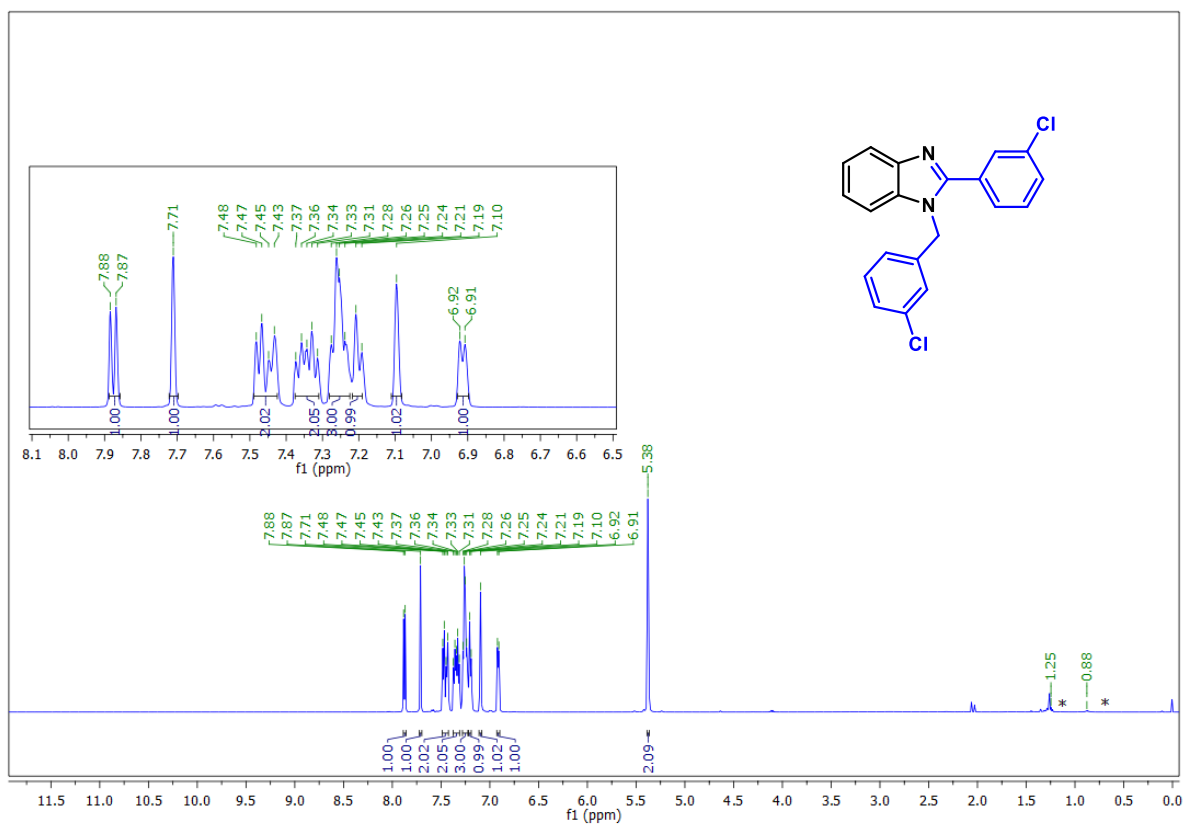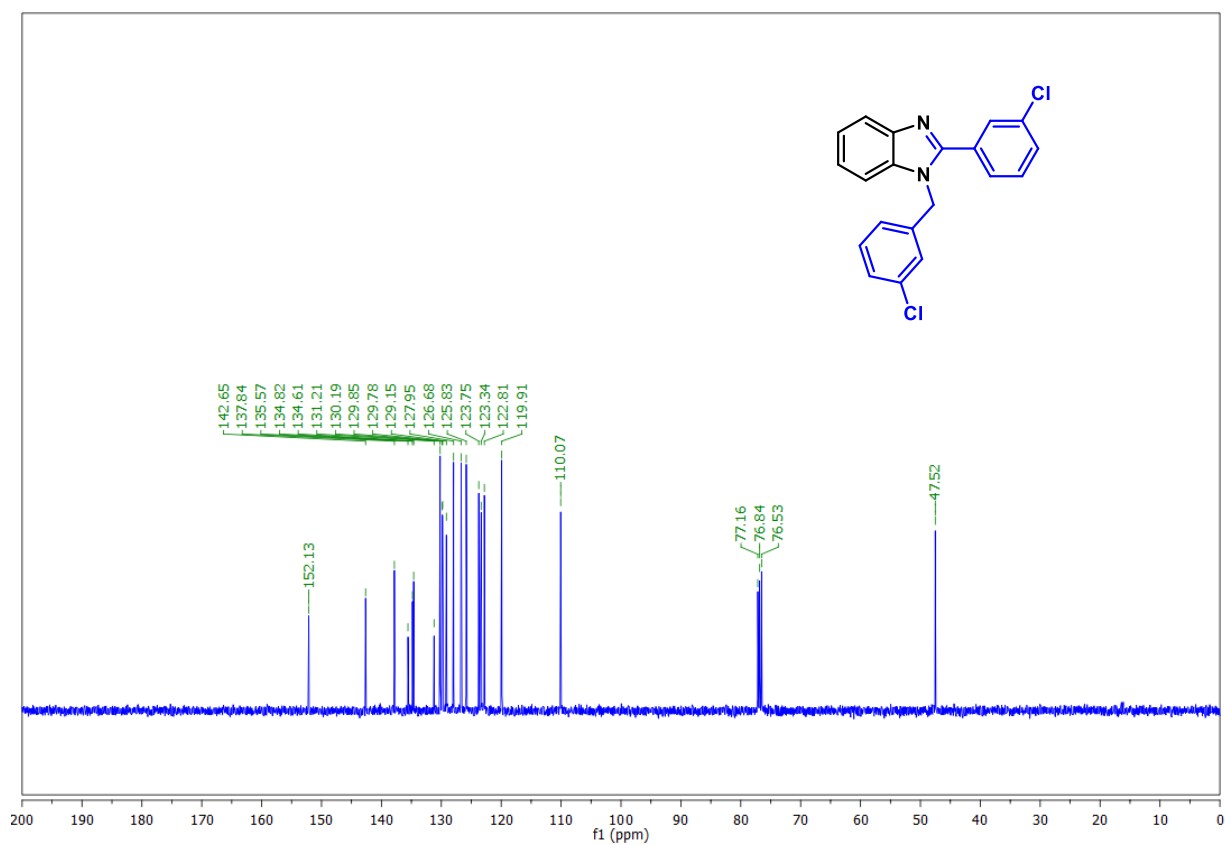

**Fig S27.** <sup>1</sup>H and <sup>13</sup>C NMR spectra of **6j** (in CDCl<sub>3</sub> solvent) (\*hexane).

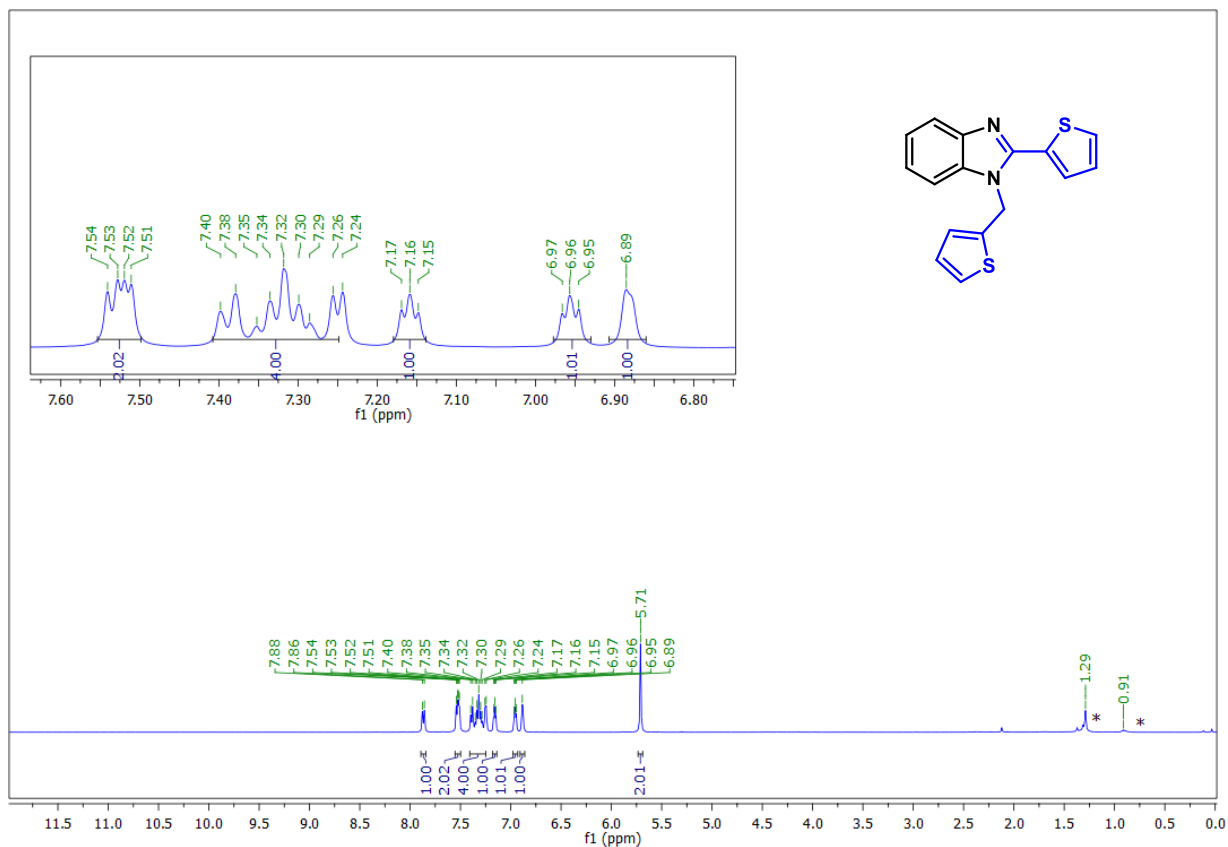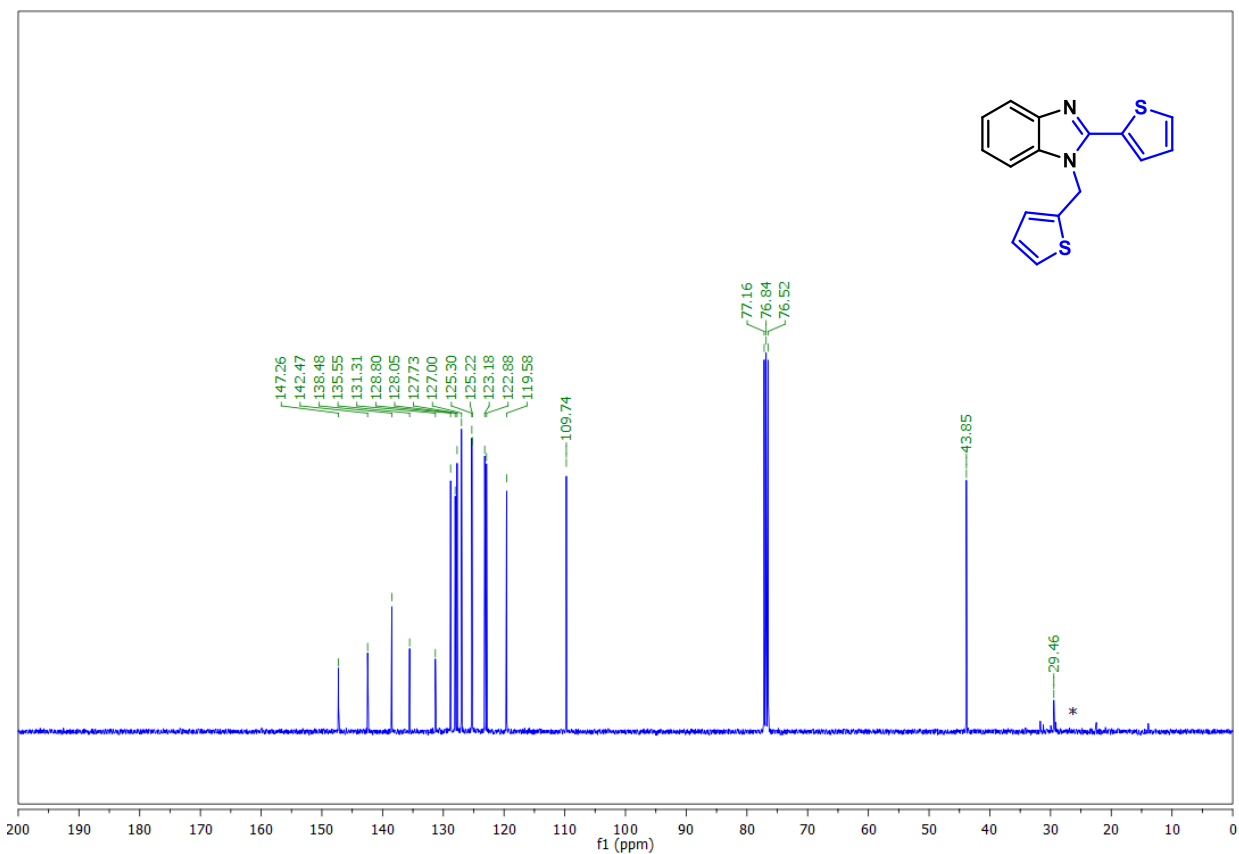

**Fig S28.** <sup>1</sup>H and <sup>13</sup>C NMR spectra of **6k** (in CDCl<sub>3</sub> solvent) (\*hexane).

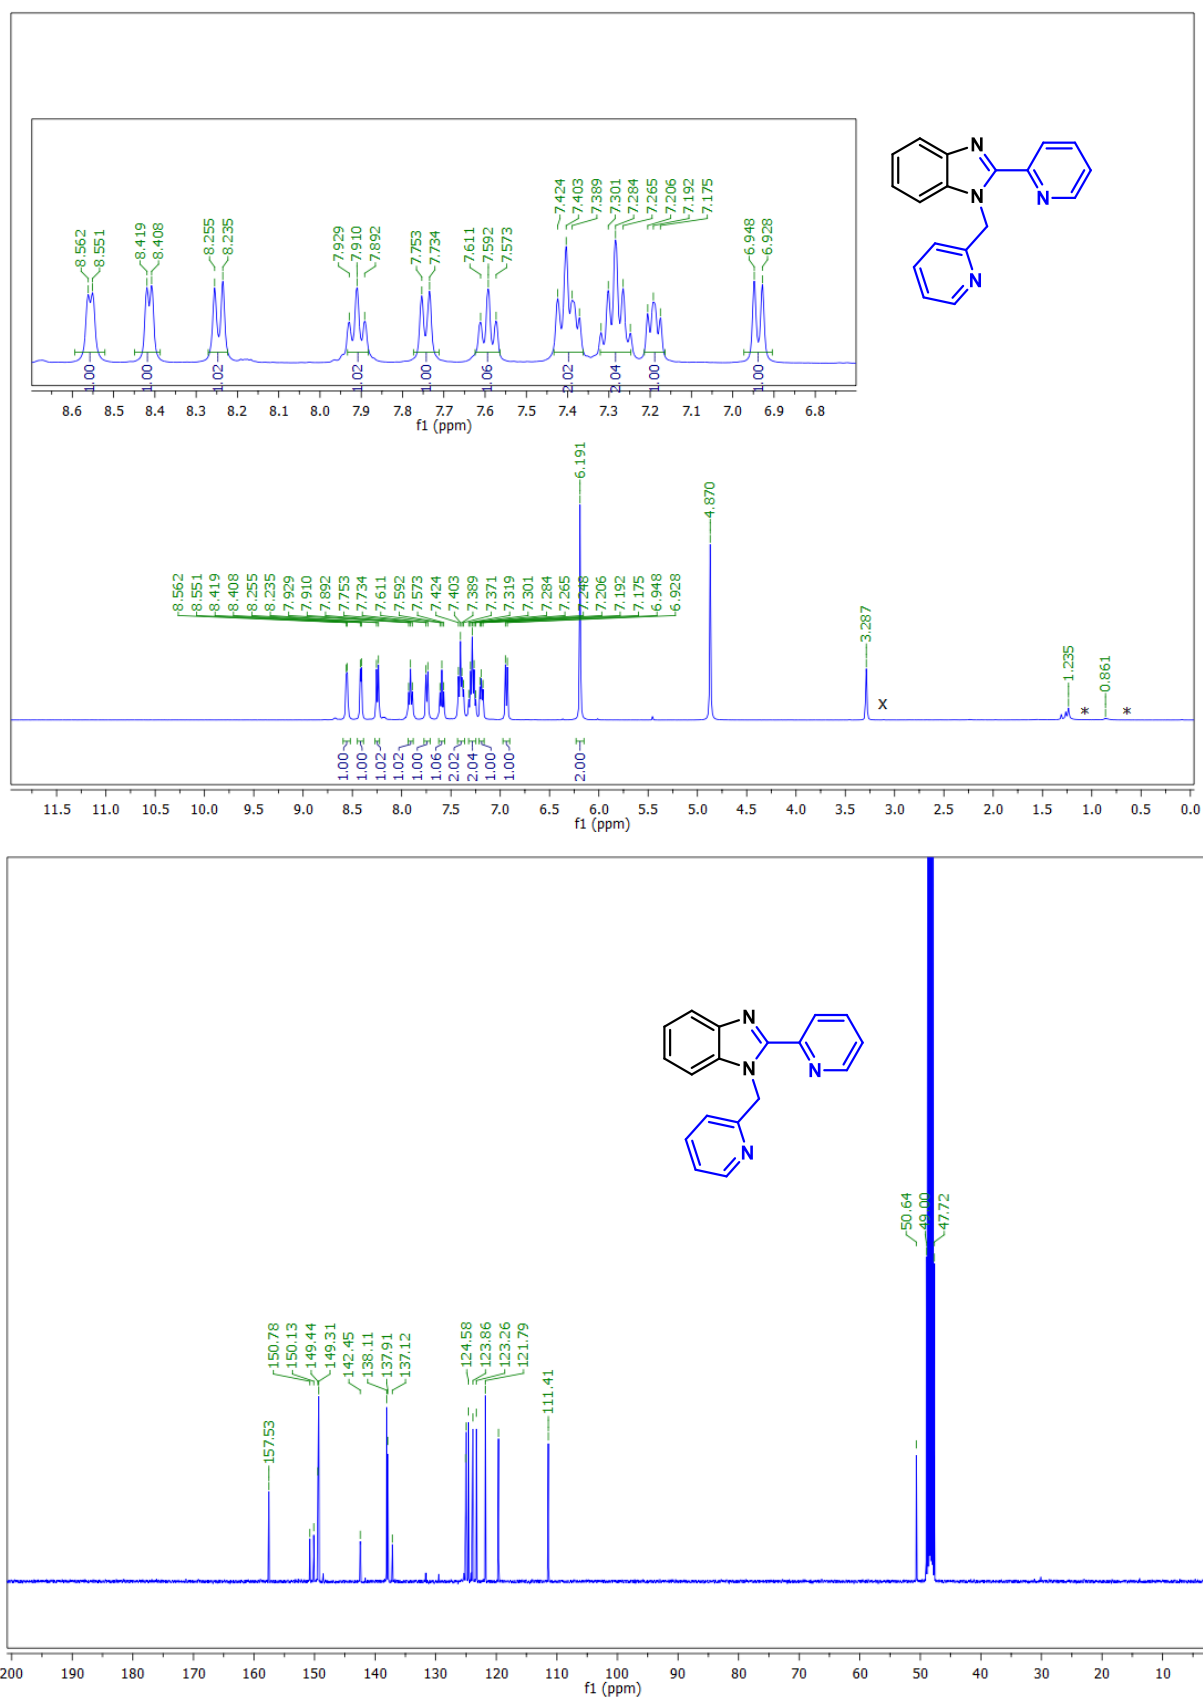

**Fig S29.** <sup>1</sup>H and <sup>13</sup>C NMR spectra of **61** (in CD<sub>3</sub>OD solvent) (X water, \*hexane).



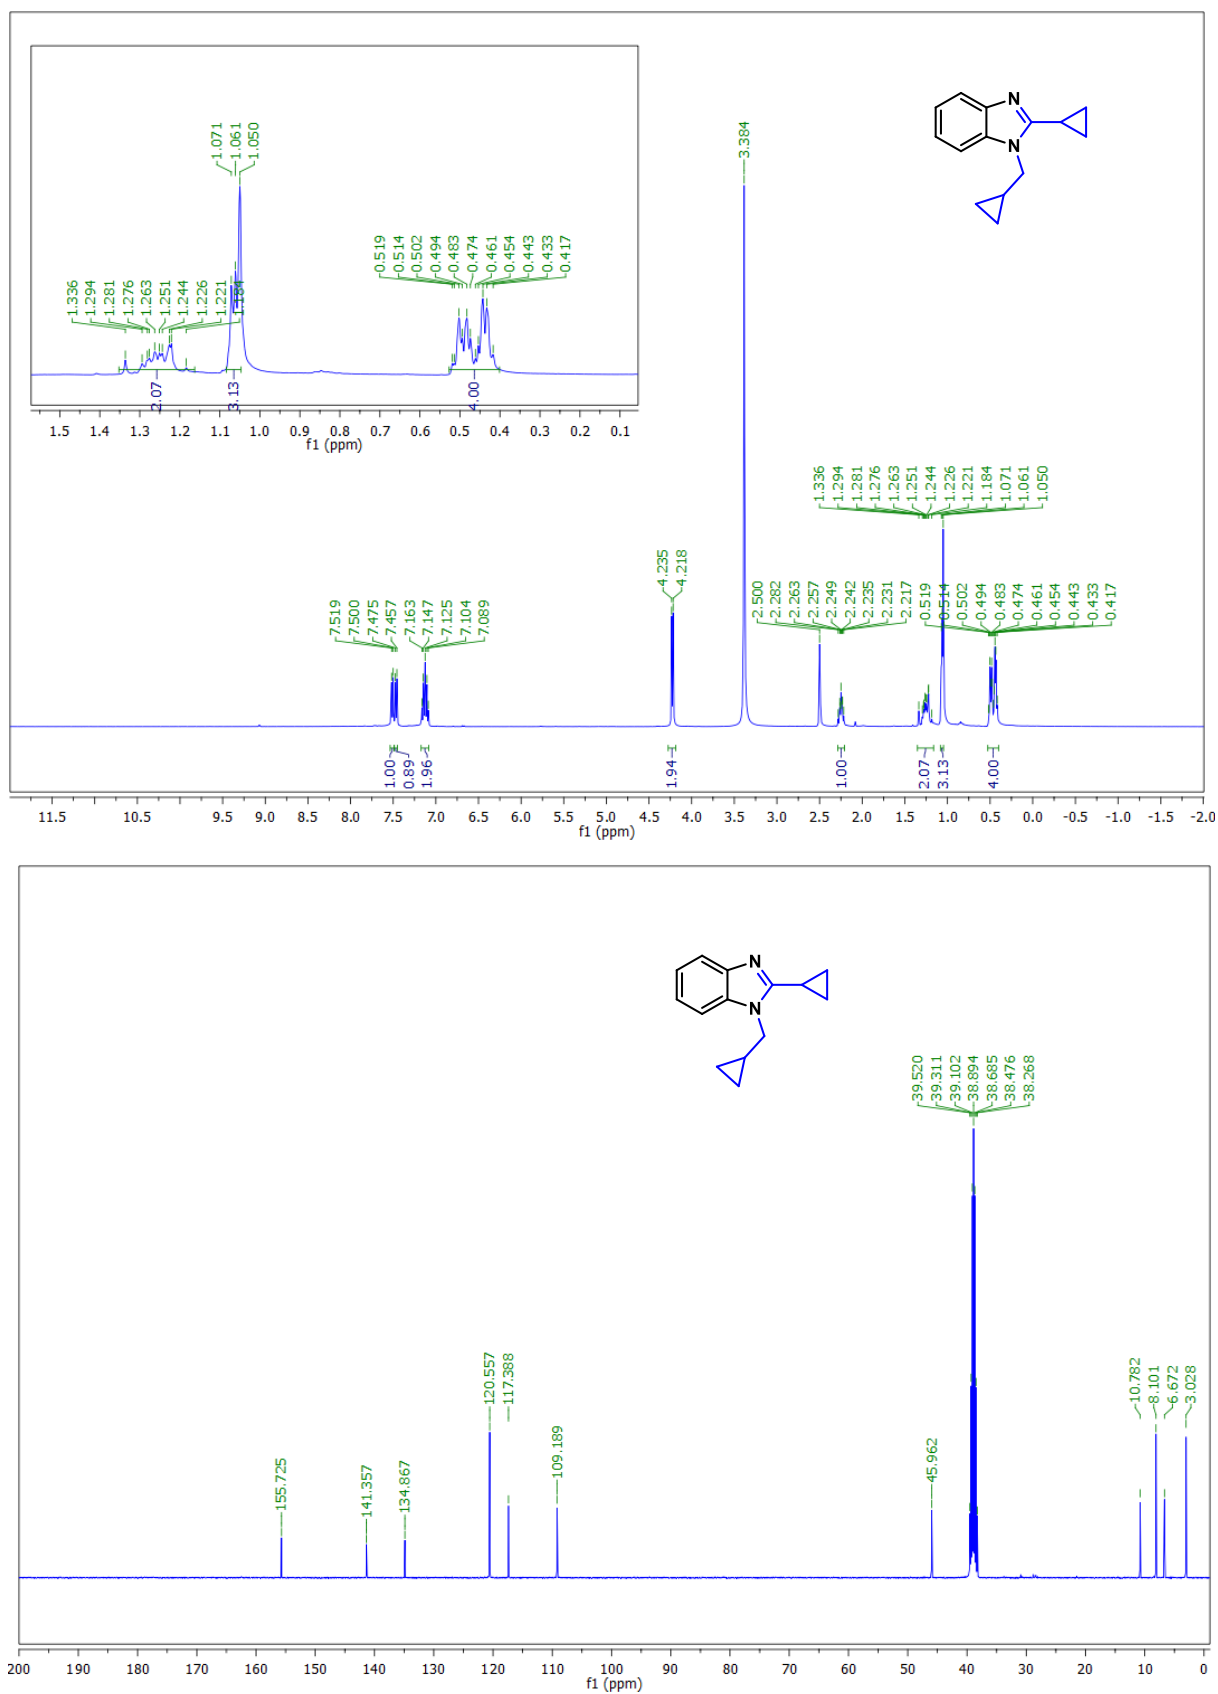

**Fig S30.** <sup>1</sup>H and <sup>13</sup>C NMR spectra of **6m** (in DMSO-d<sub>6</sub> solvent).

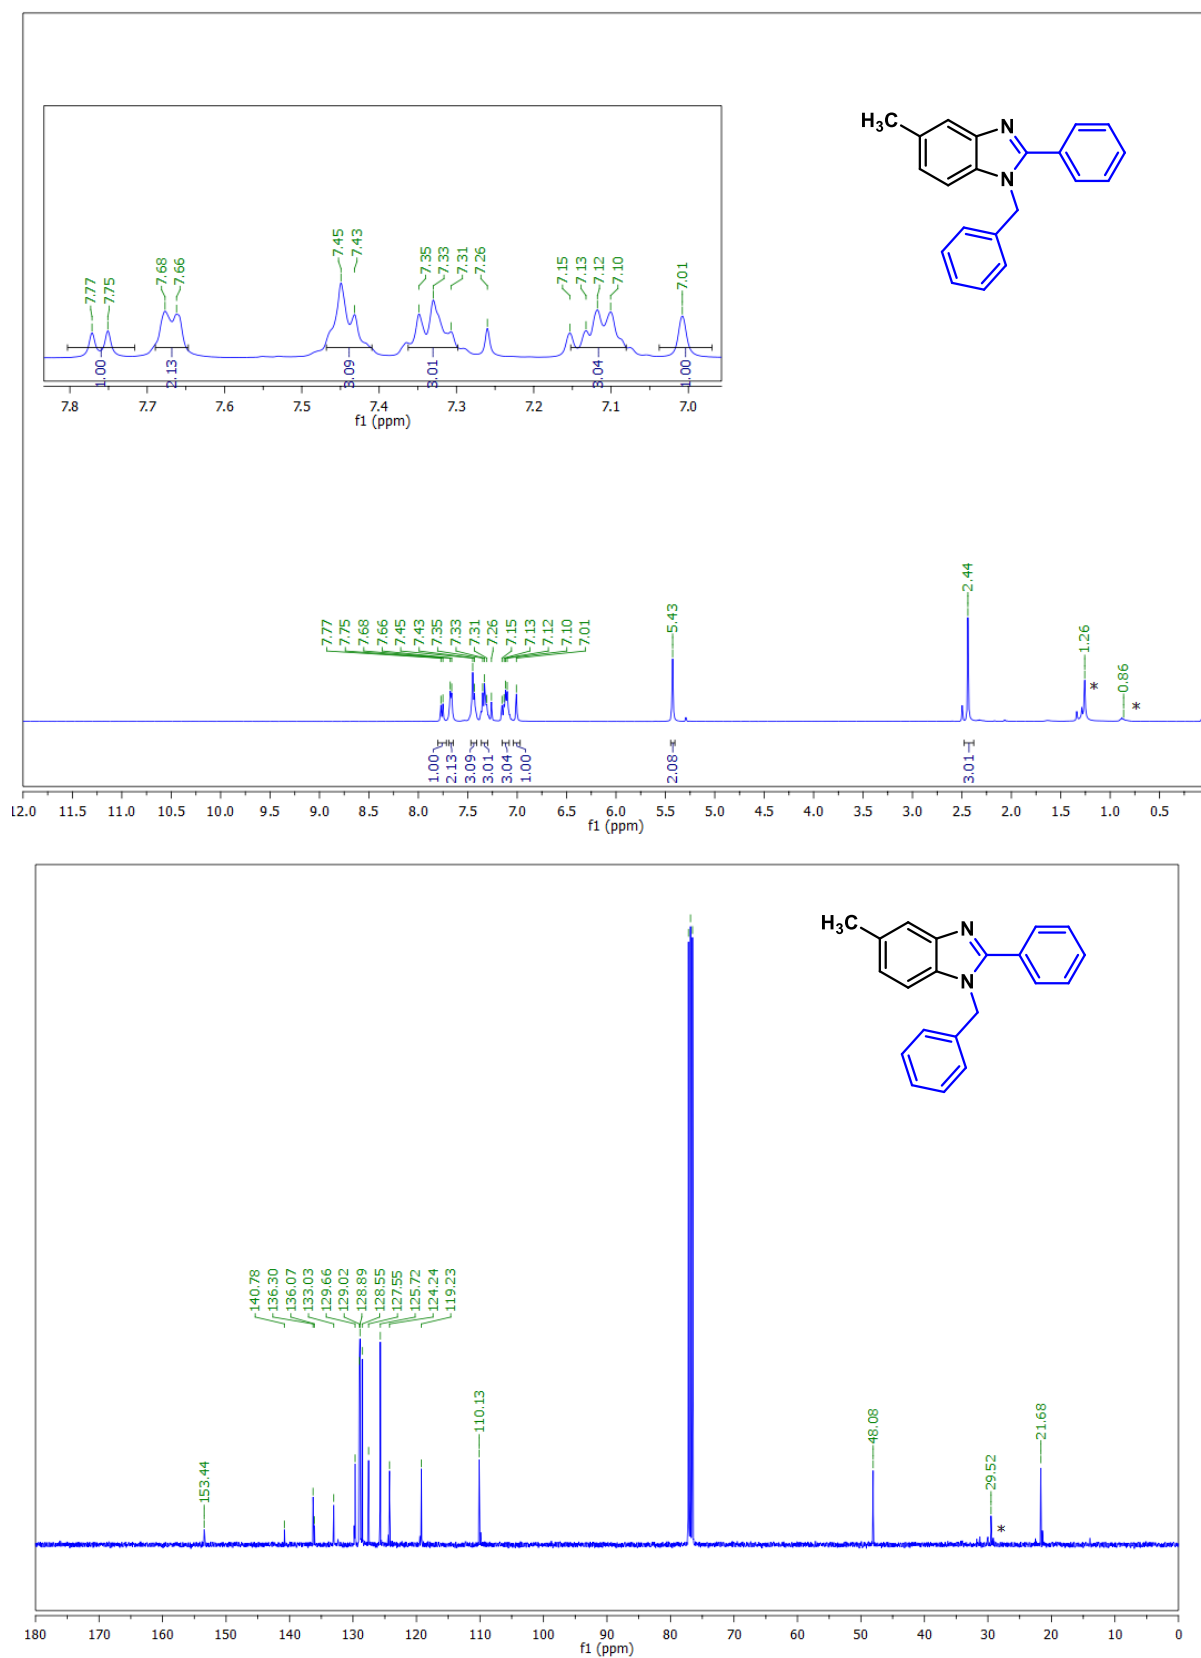

**Fig S31.** <sup>1</sup>H and <sup>13</sup>C NMR spectra of **6n** (in CDCl<sub>3</sub> solvent) (\*hexane).

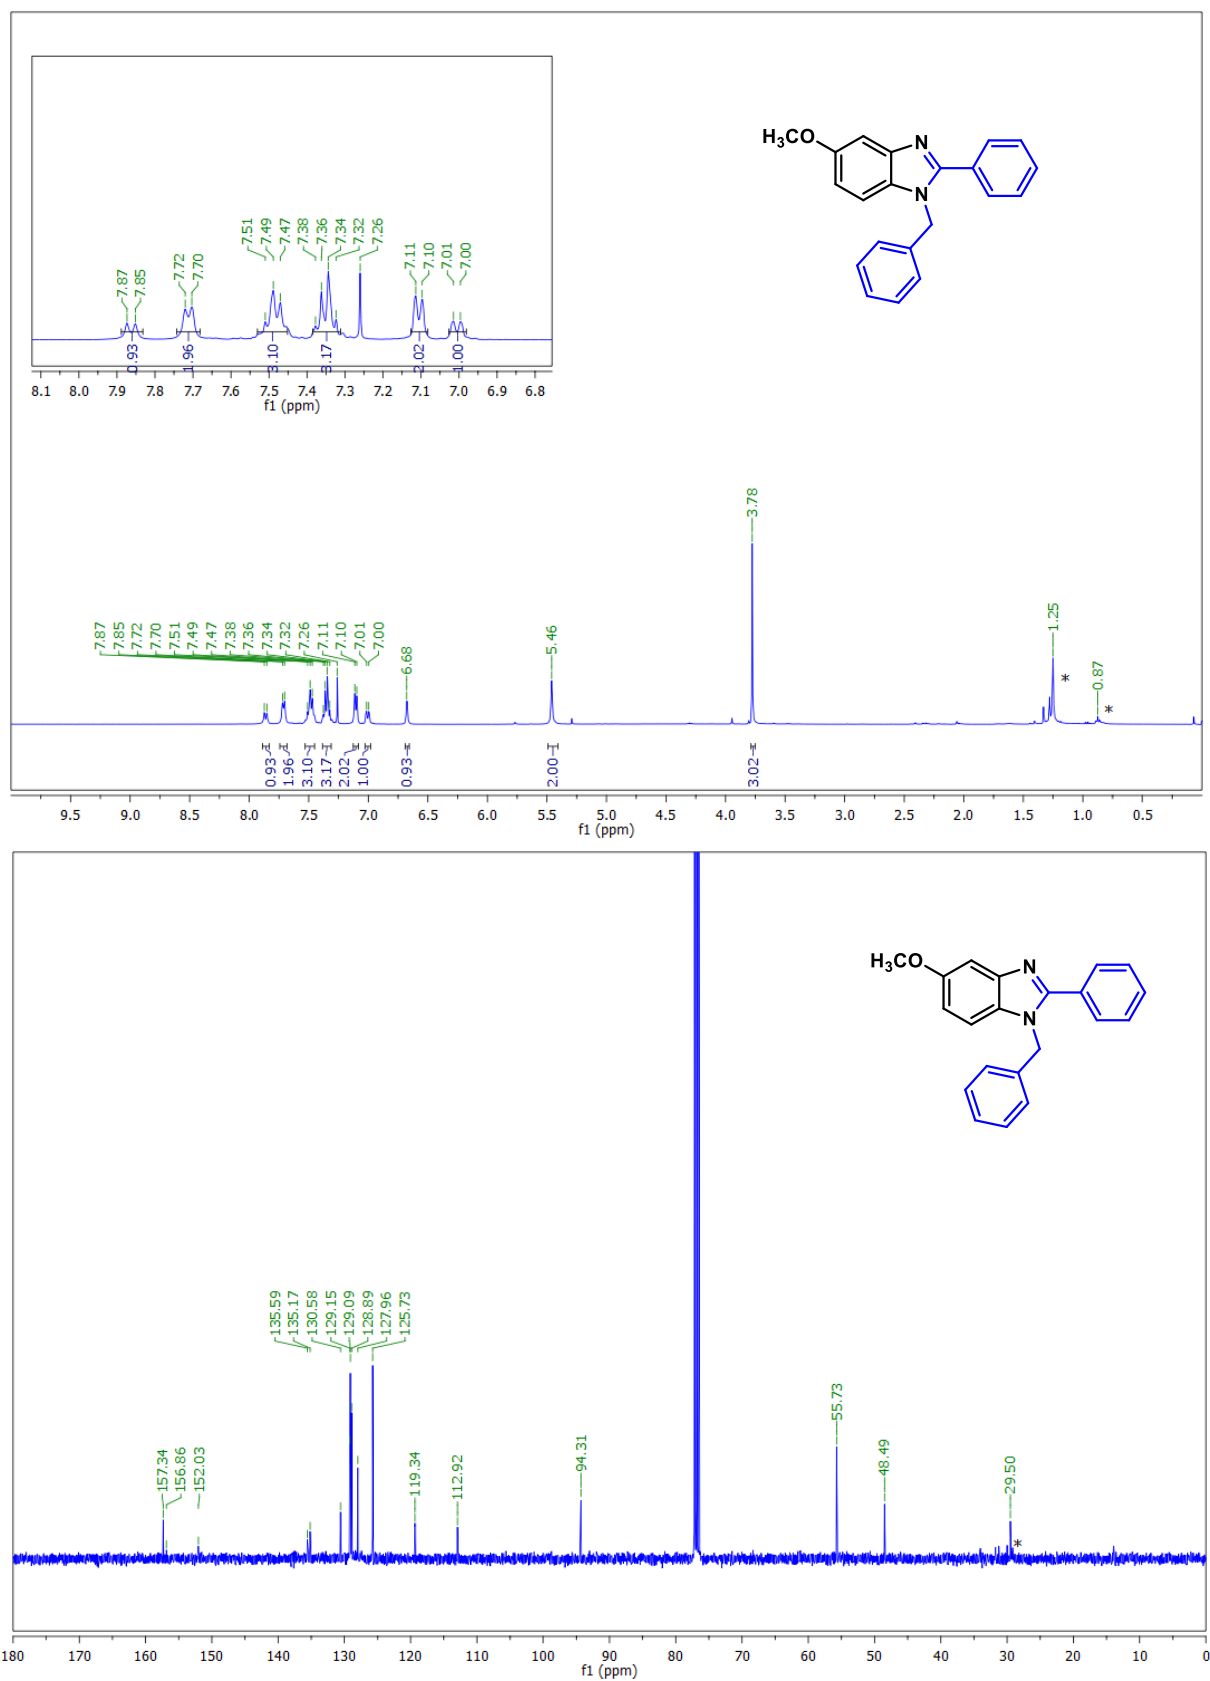

**Fig S32.** <sup>1</sup>H and <sup>13</sup>C NMR spectra of **60** (in CDCl<sub>3</sub> solvent, \*hexane).

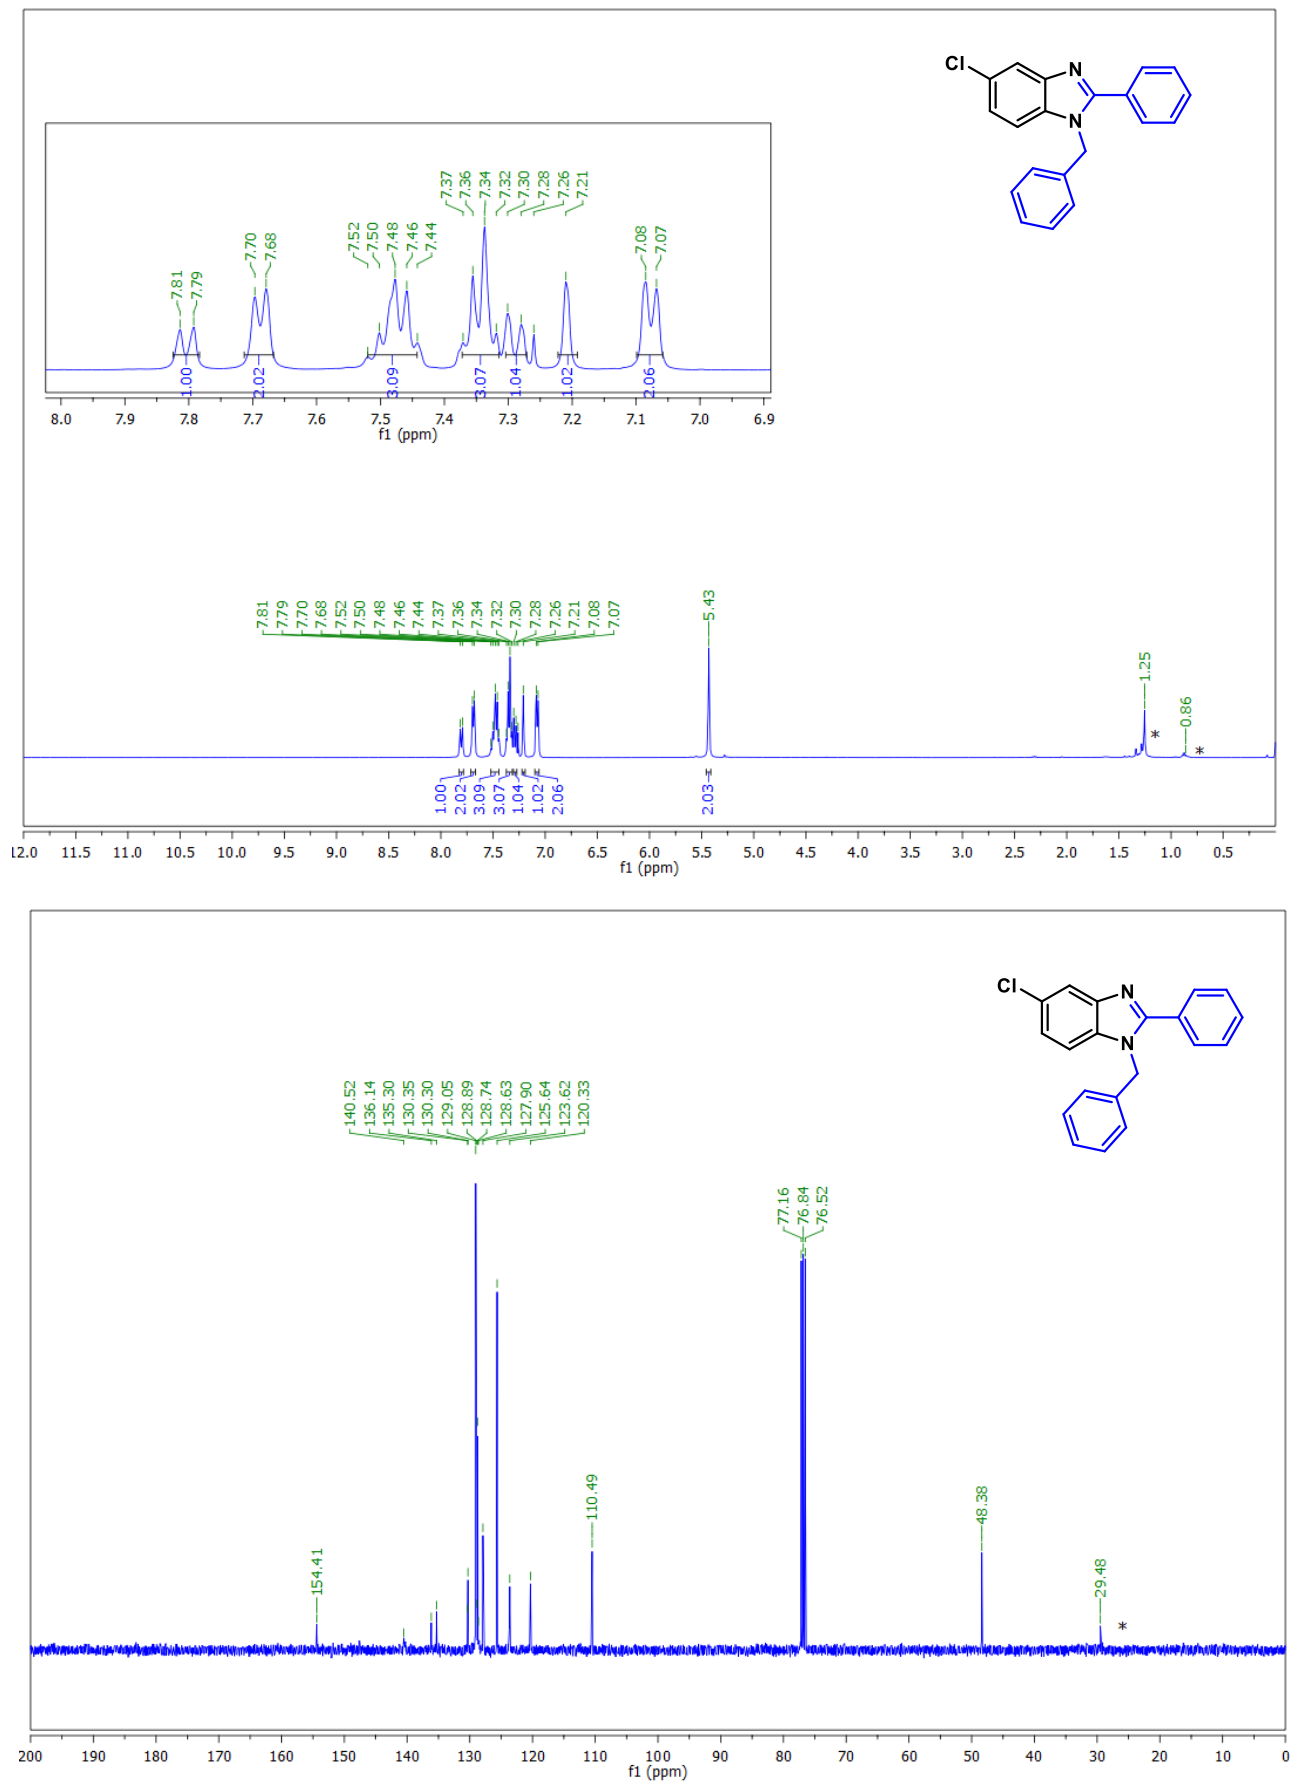

**Fig S33.** <sup>1</sup>H and <sup>13</sup>C NMR spectra of **6p** (in CDCl<sub>3</sub> solvent, \* hexane).

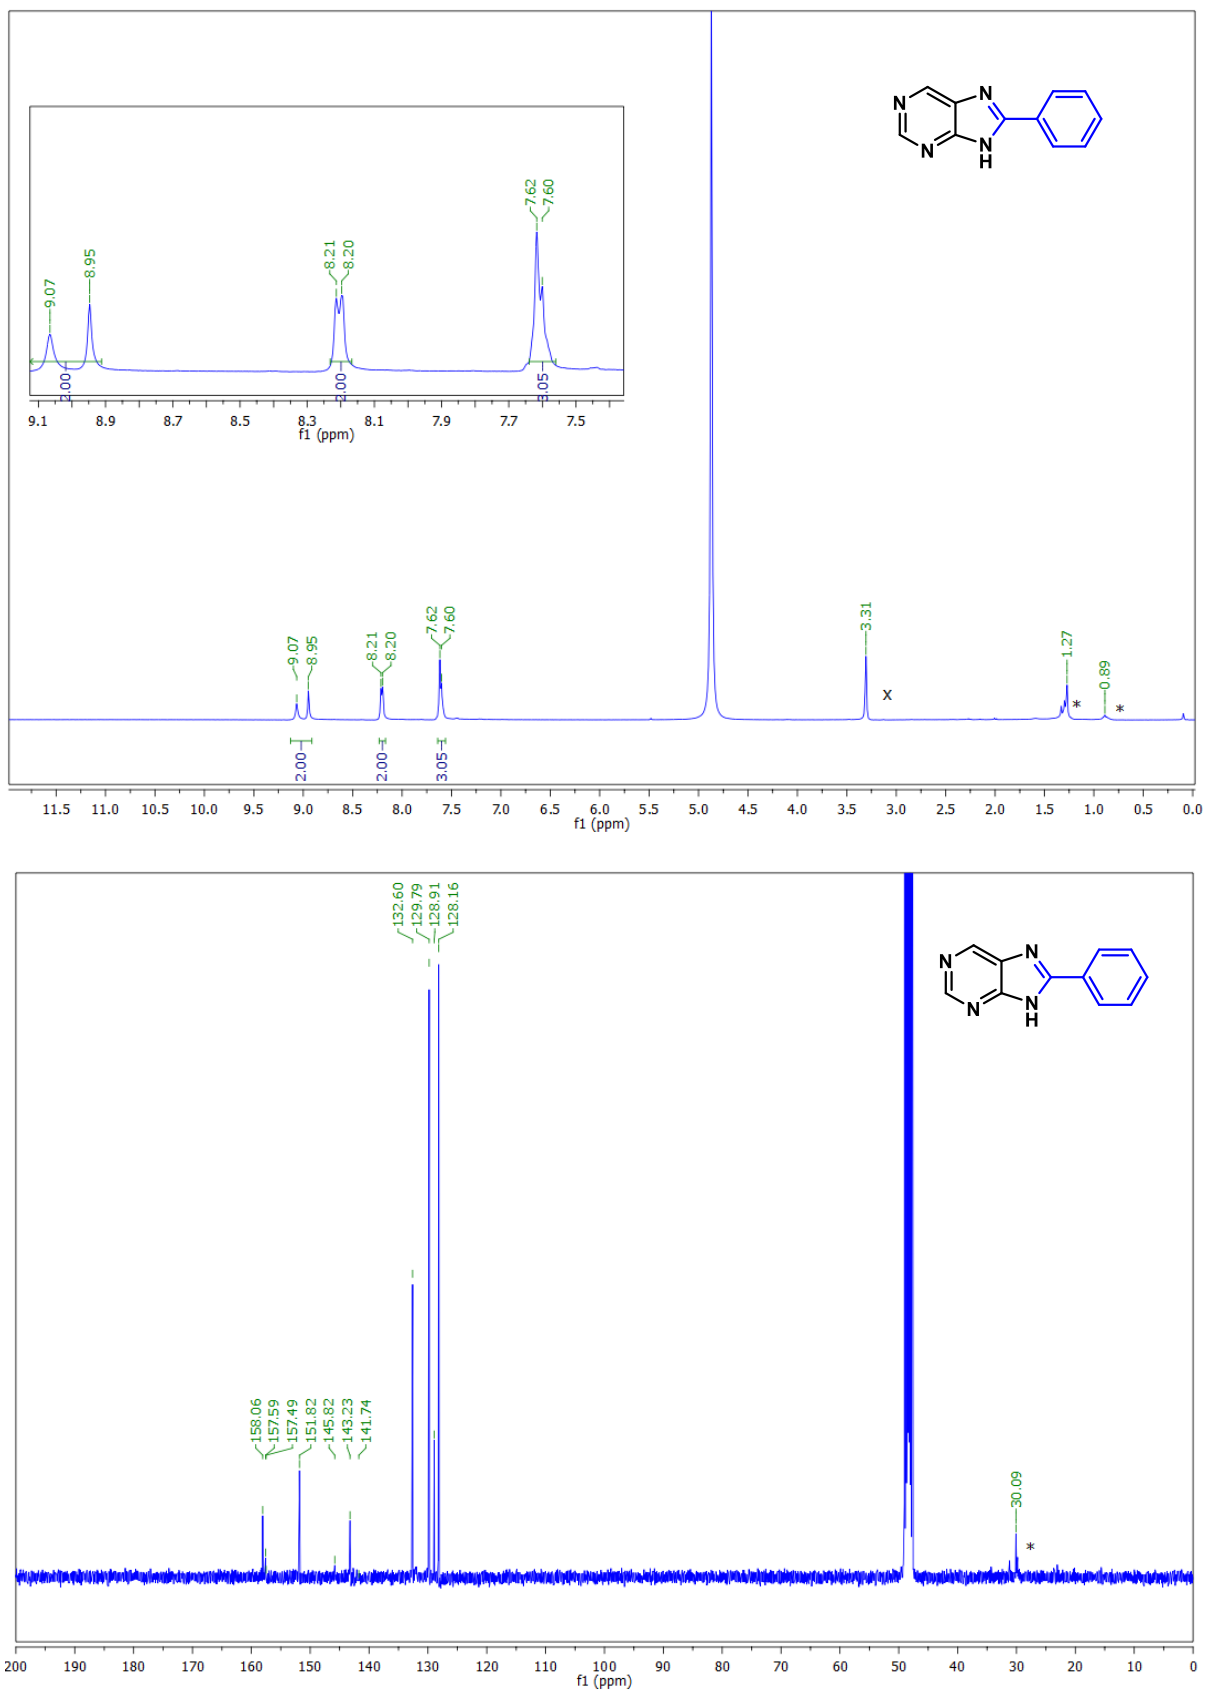

**Fig S34.** <sup>1</sup>H and <sup>13</sup>C NMR spectra of **10a** (in CD<sub>3</sub>OD solvent) (x water, \*hexane).

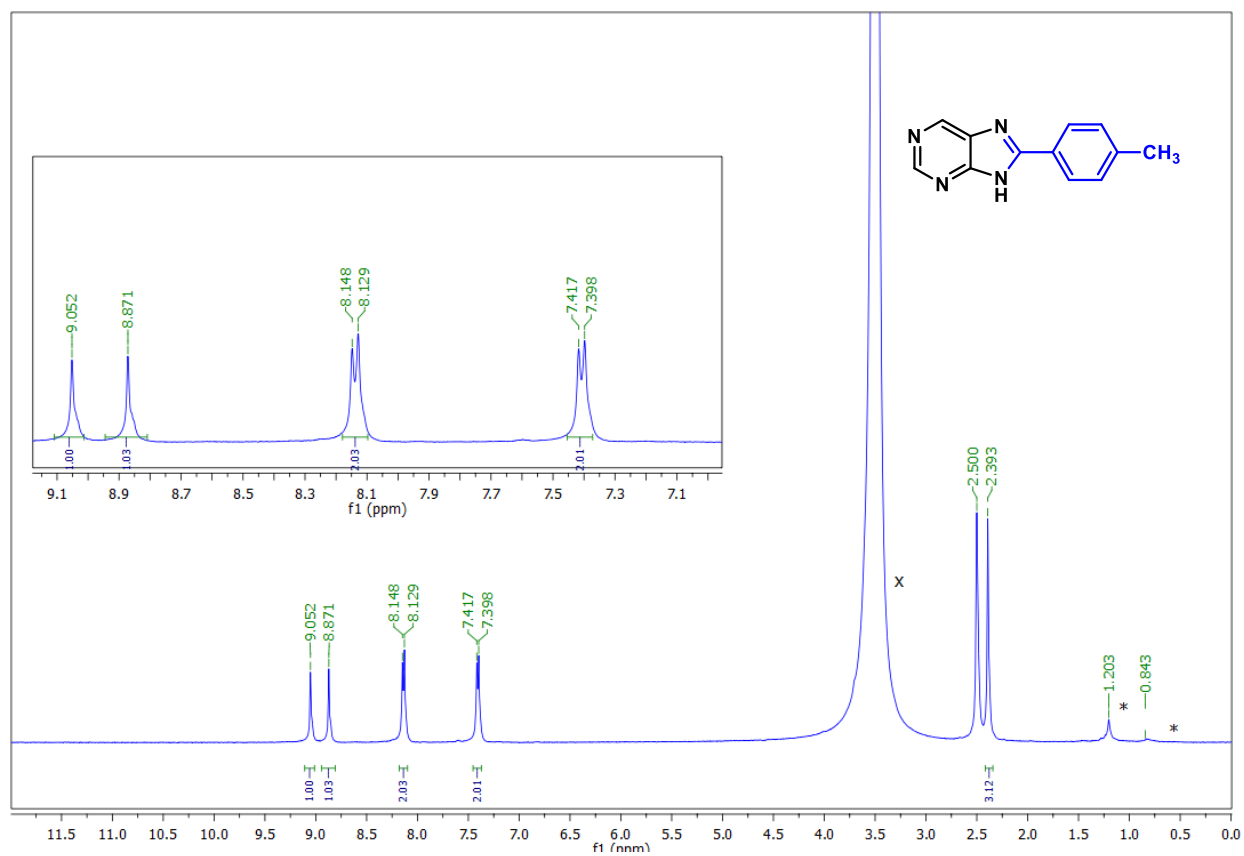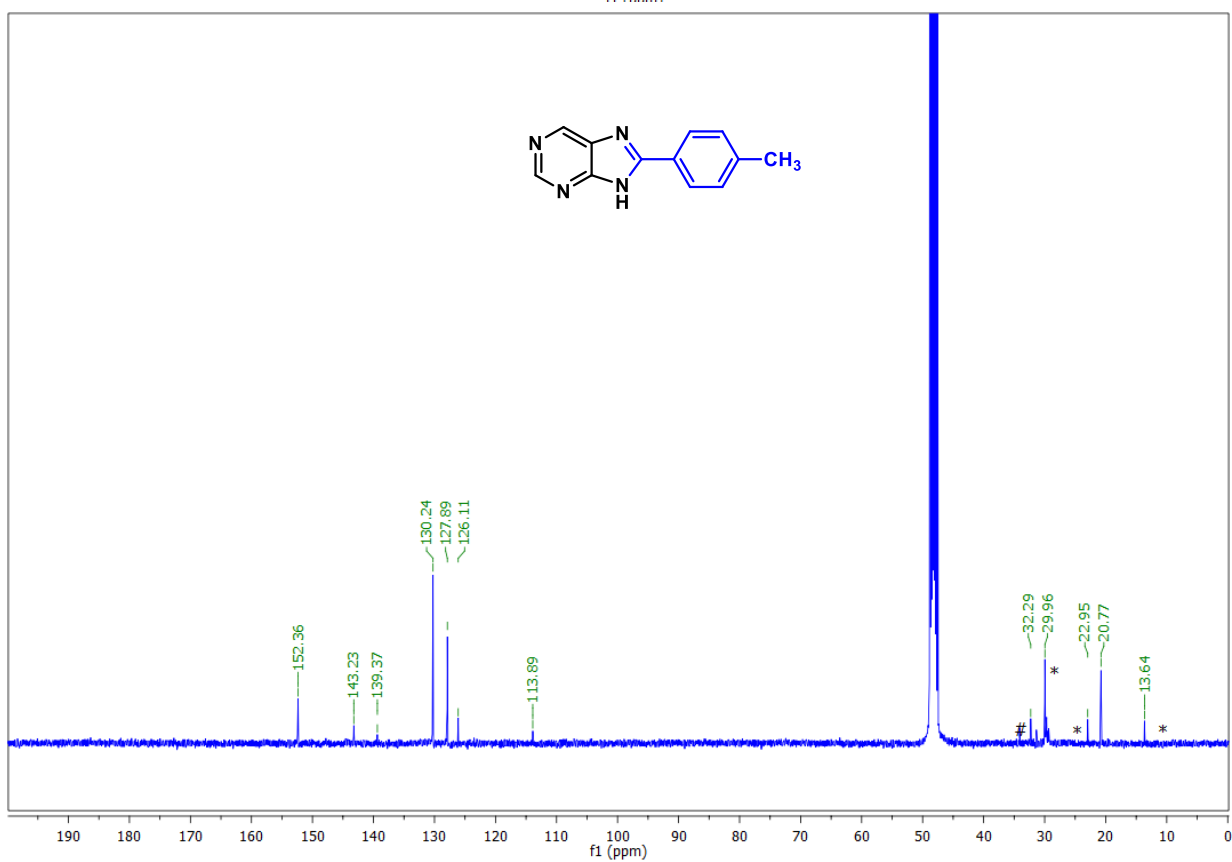

**Fig S35.** <sup>1</sup>H (in DMSO-d<sub>6</sub> solvent) and <sup>13</sup>C NMR spectra of **10b** (in CD<sub>3</sub>OD solvent) (x water, # acetone, \* hexane).

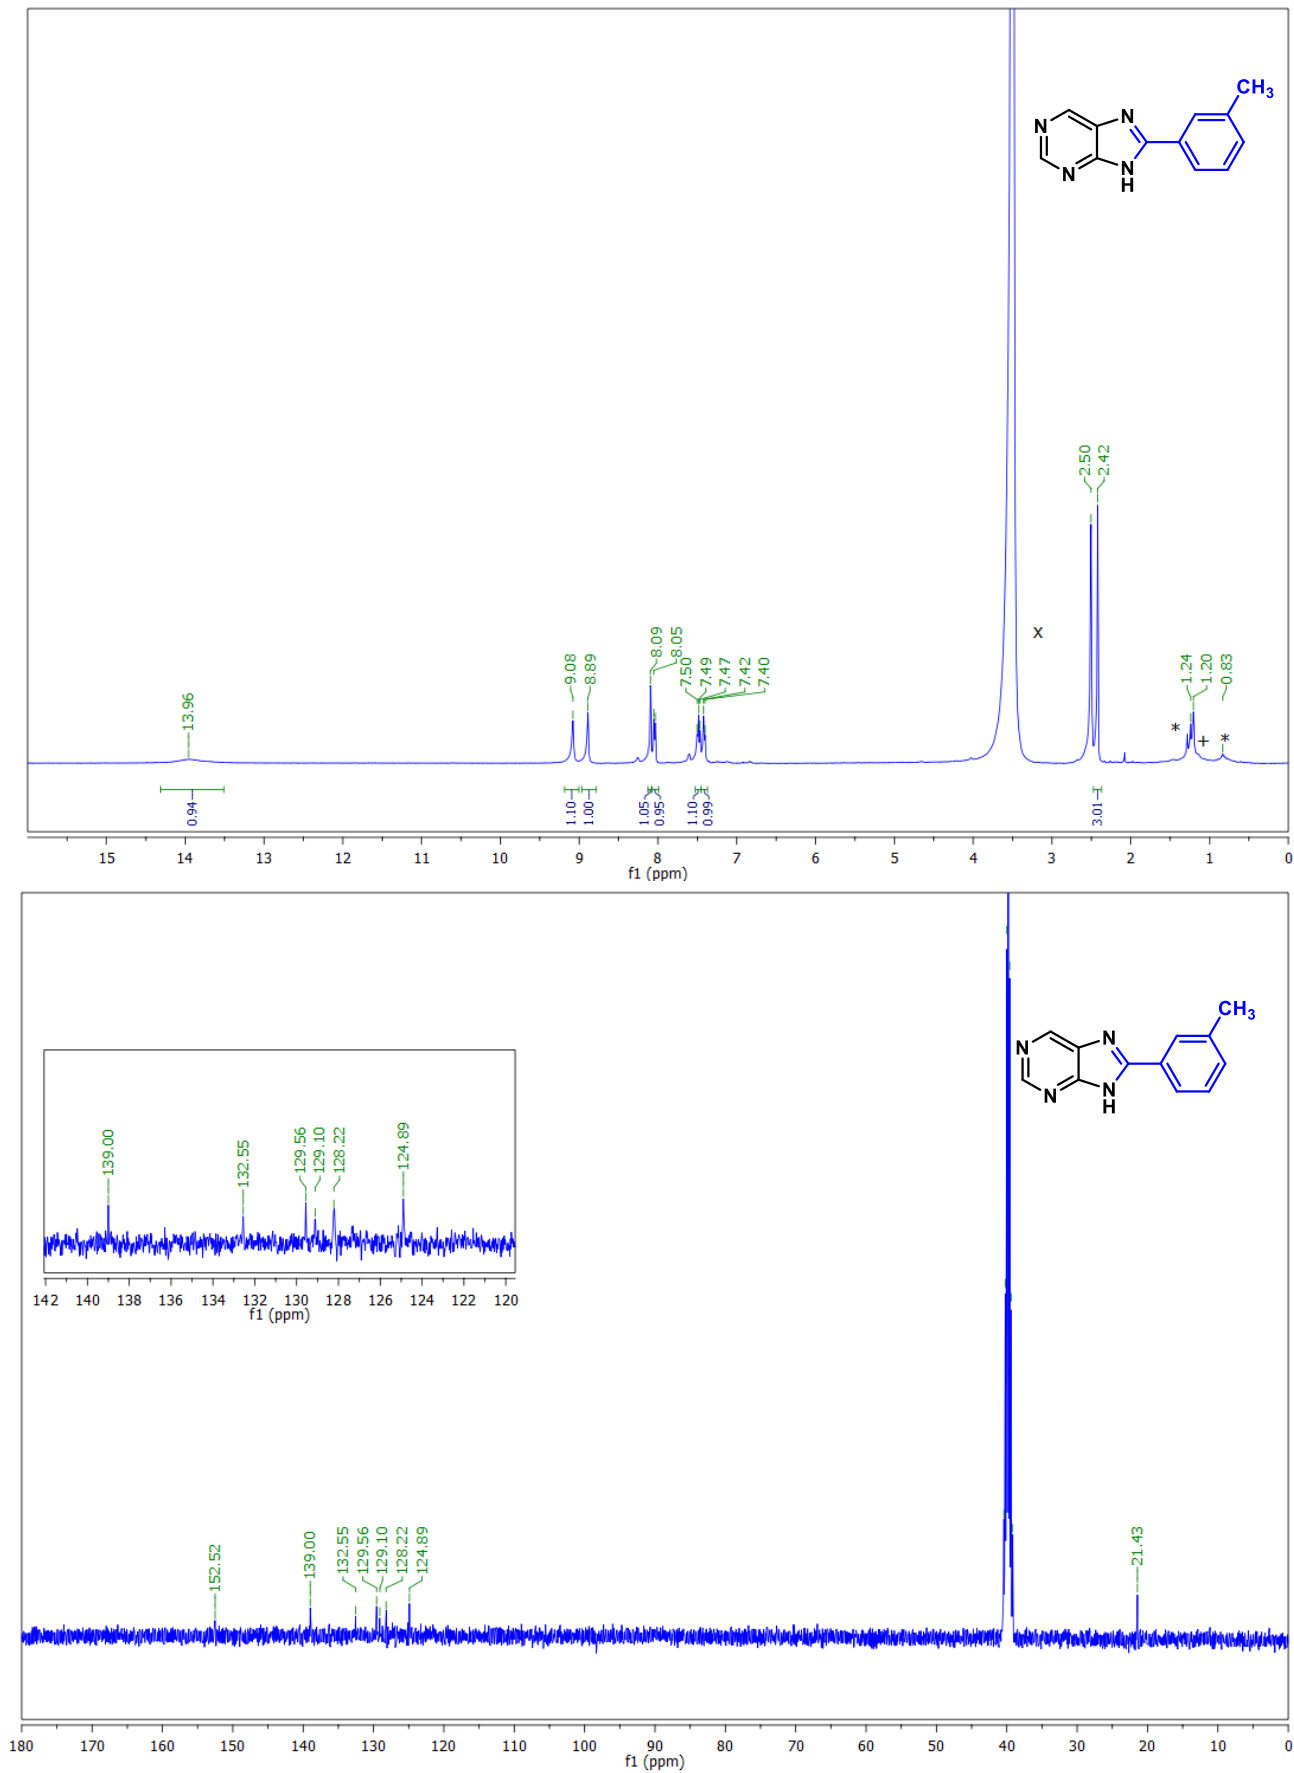

**Fig S36.** <sup>1</sup>H and <sup>13</sup>C NMR spectra of **10c** (in DMSO-d<sub>6</sub> solvent) (X water, +ethylacetate, \*hexane).

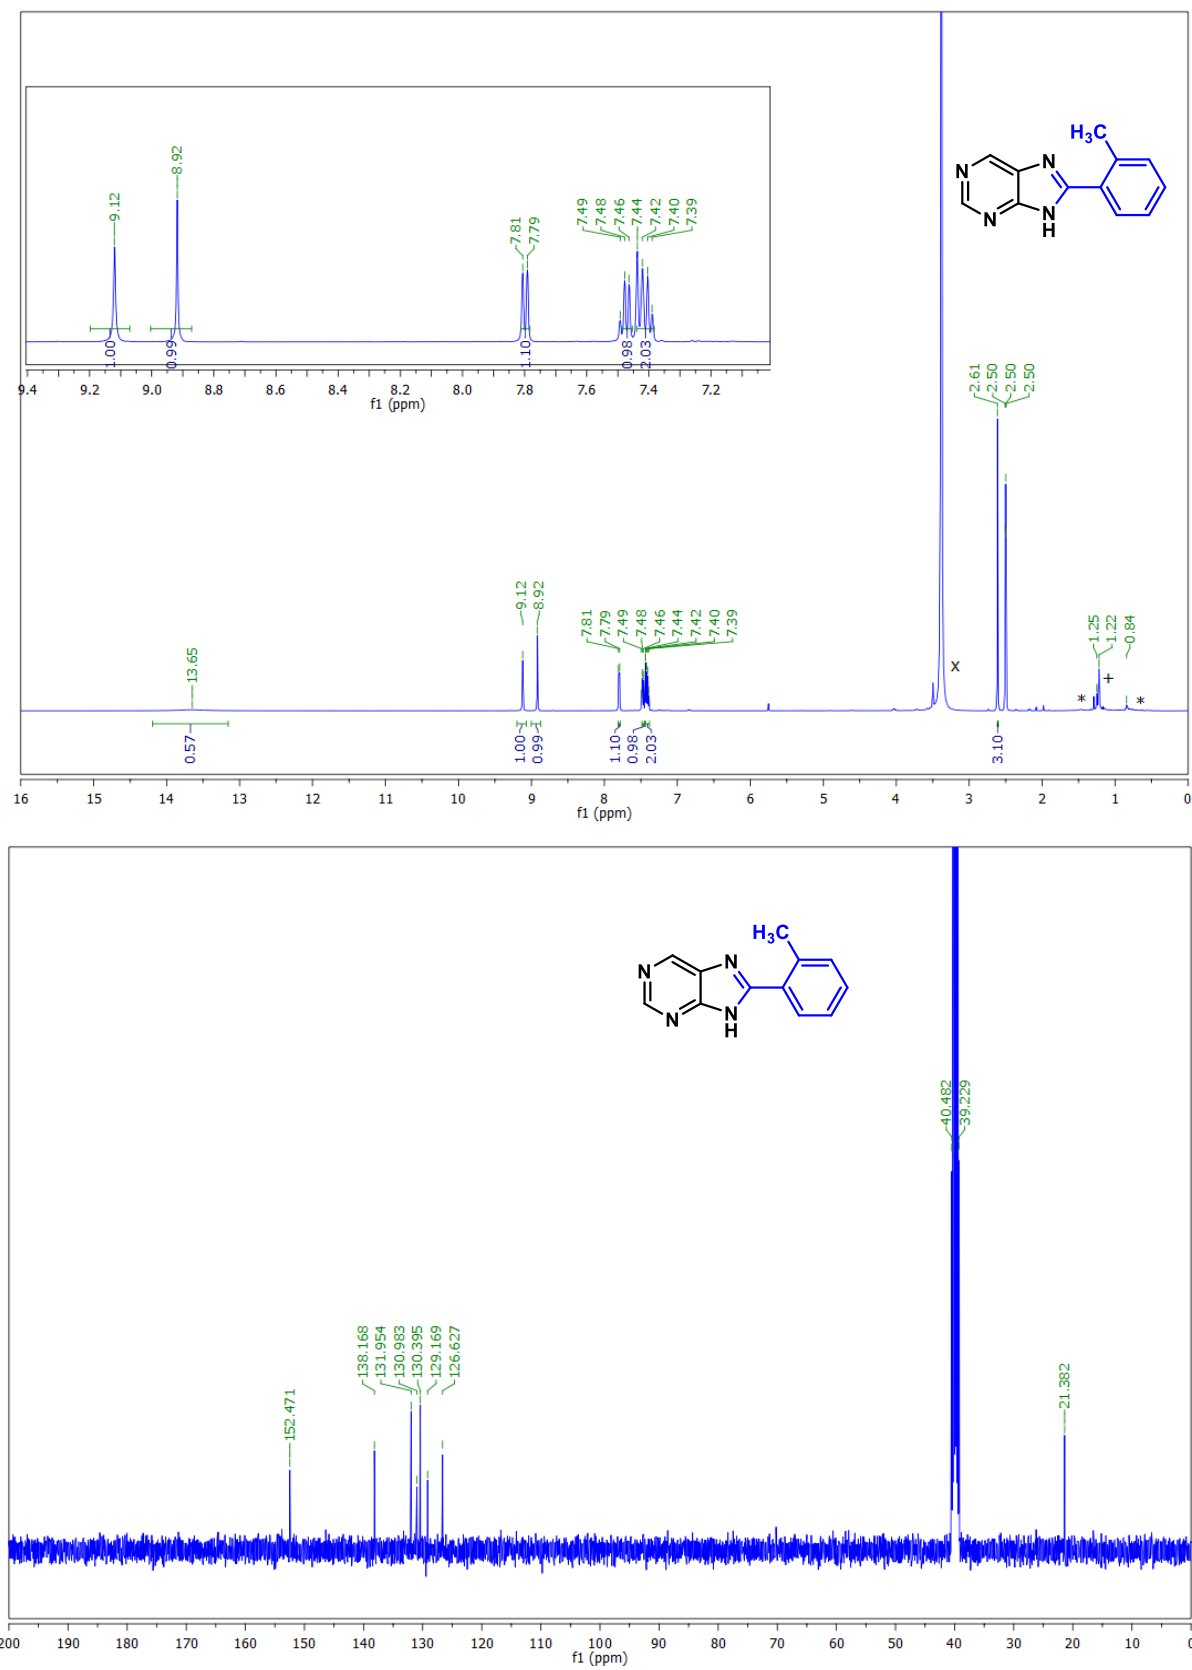

**Fig S37.** <sup>1</sup>H and <sup>13</sup>C NMR spectra of **10d** (in DMSO-d<sub>6</sub> solvent) (x water, + ethylacetate, \* hexane).



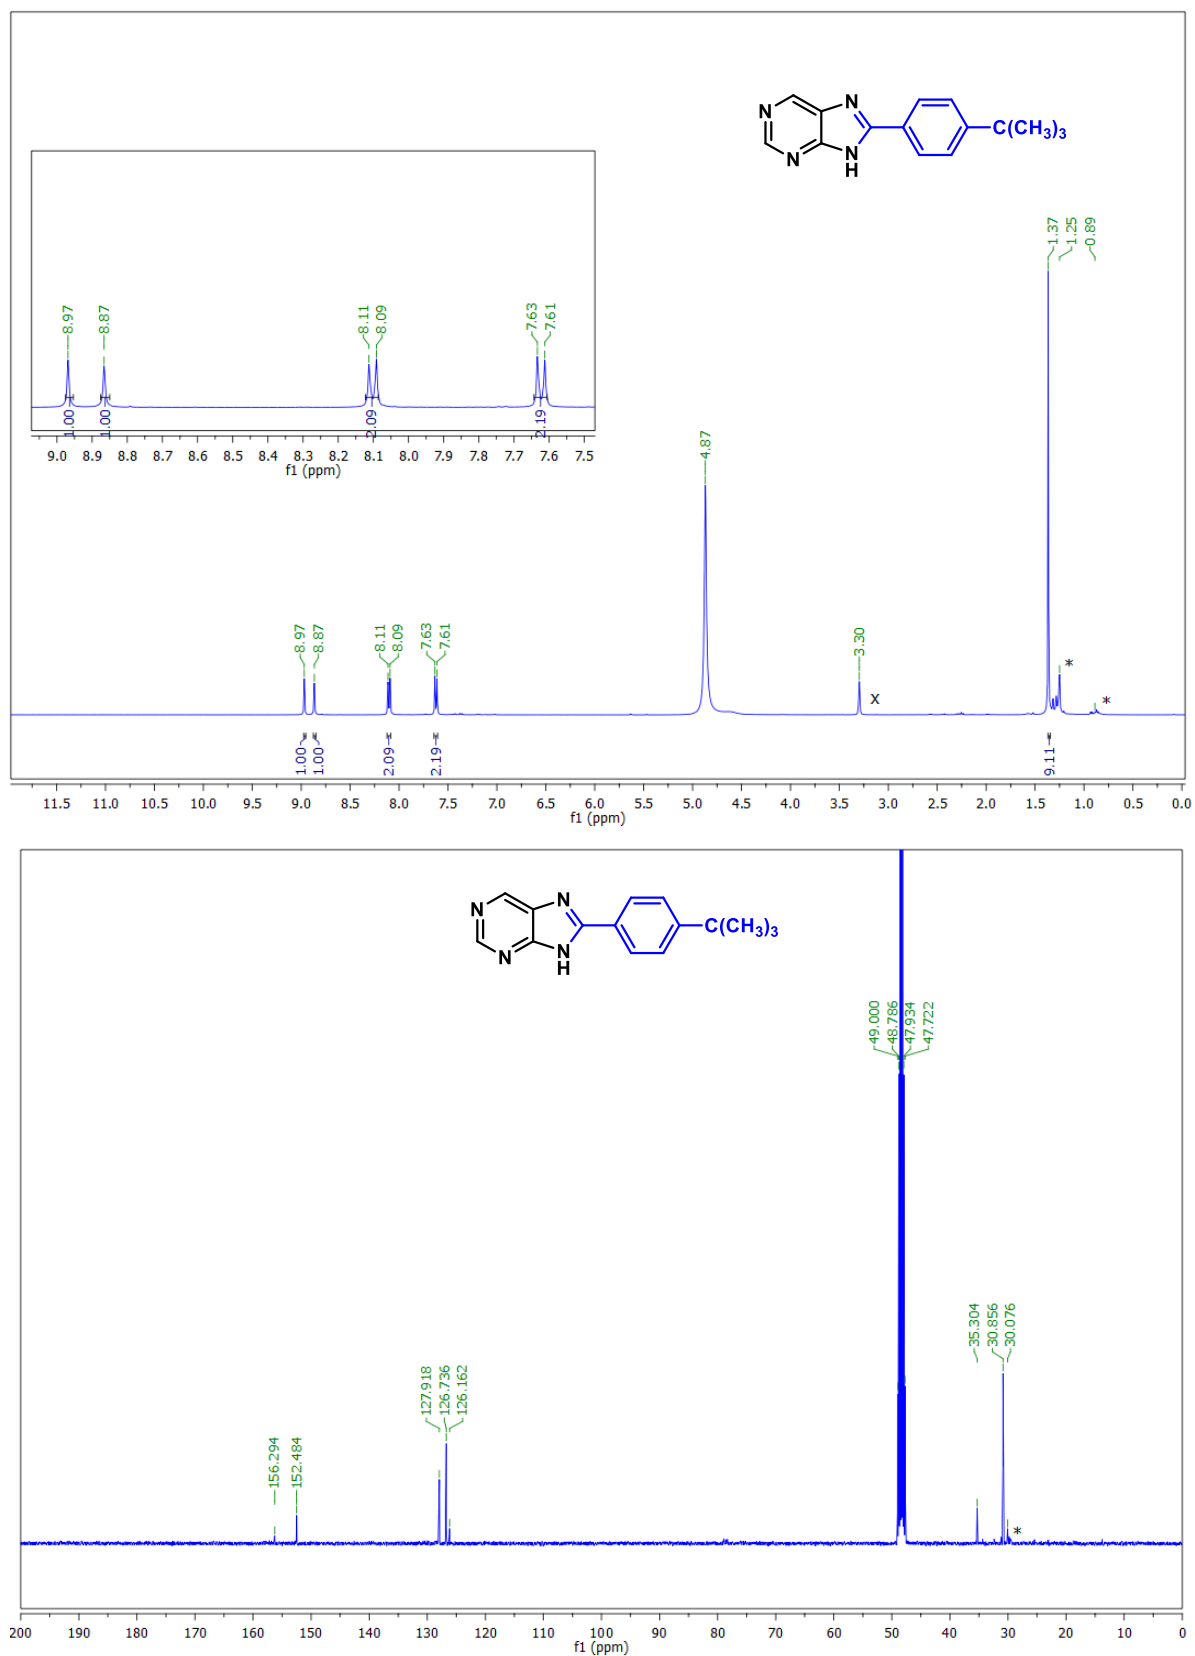

**Fig S38.** <sup>1</sup>H and <sup>13</sup>C NMR spectra of **10e** (in CD<sub>3</sub>OD solvent) (\*water, \*hexane).

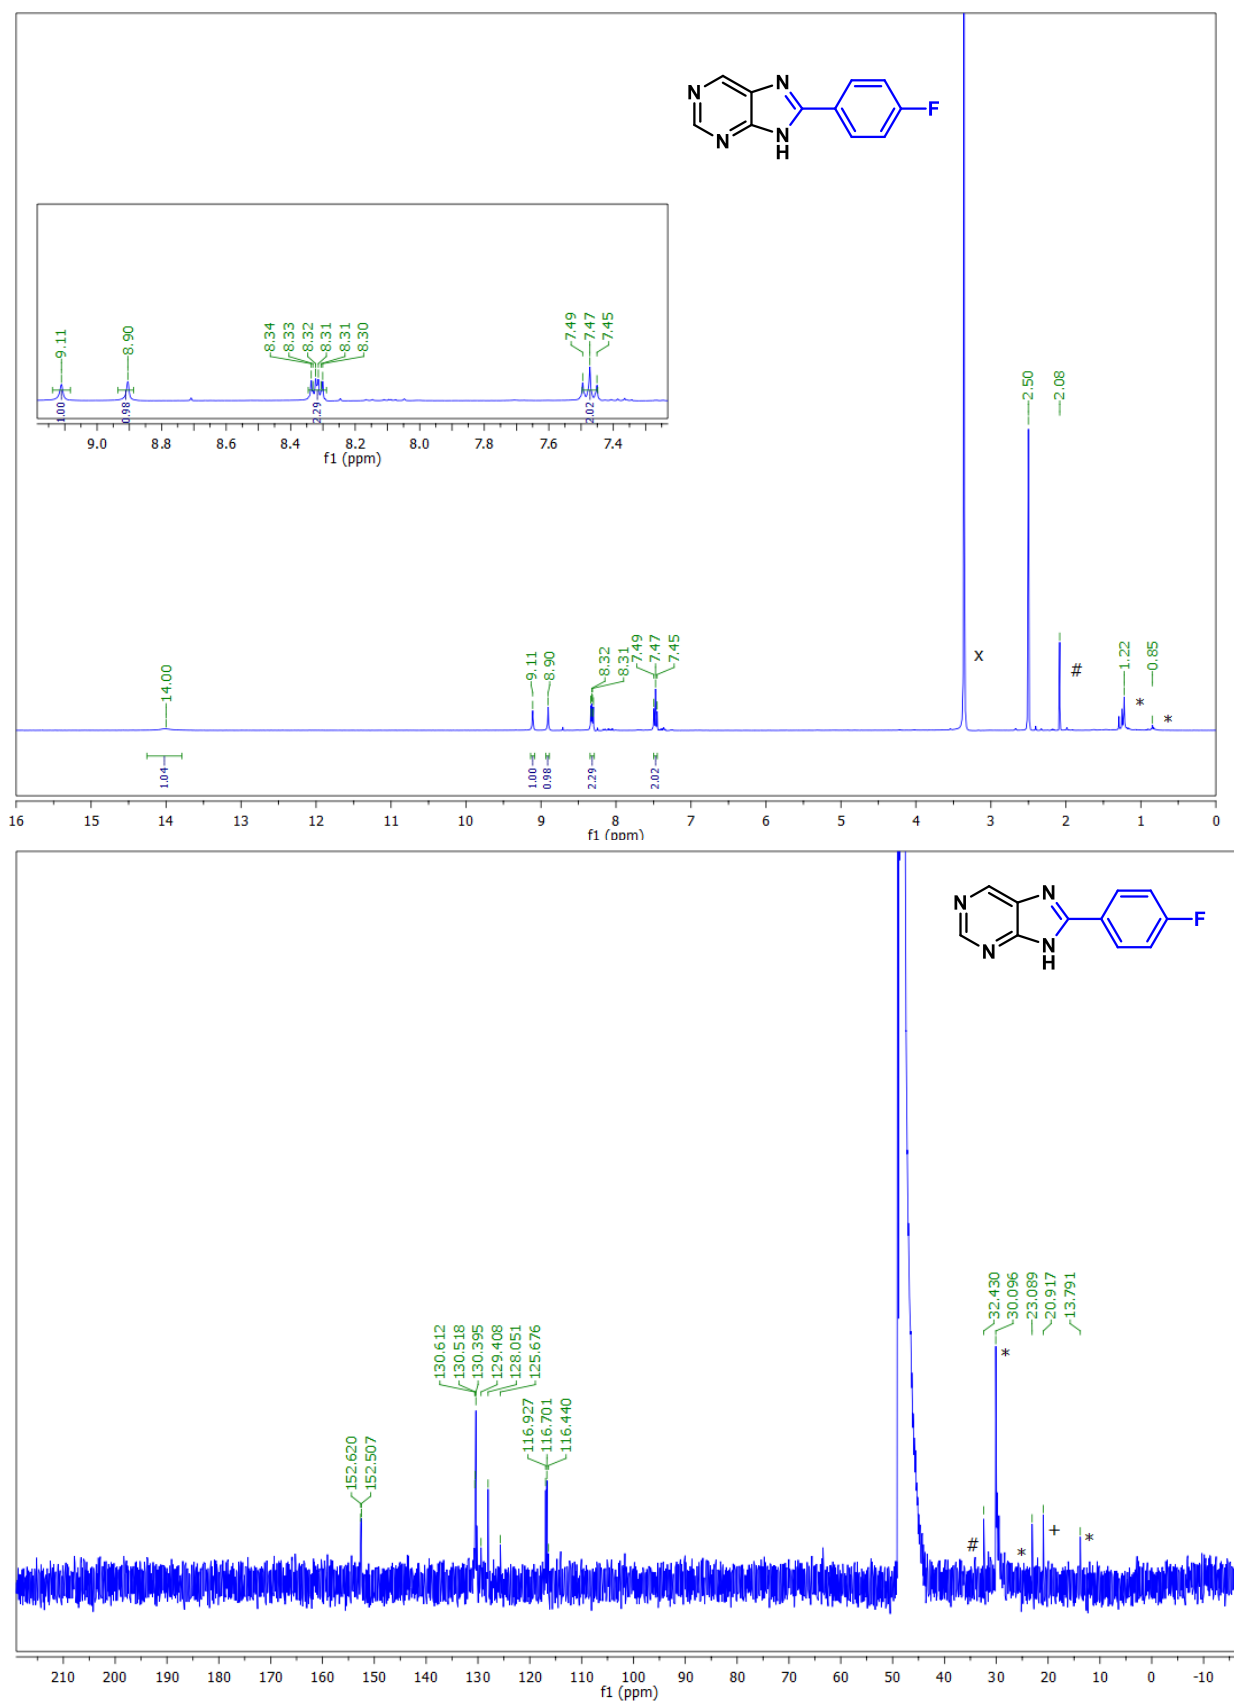

**Fig S39.** <sup>1</sup>H (in DMSO-d<sub>6</sub> solvent) and <sup>13</sup>C (in CD<sub>3</sub>OD solvent) NMR spectra of **10f** (\*water, #acetone, +ethylacetate, \*hexane).

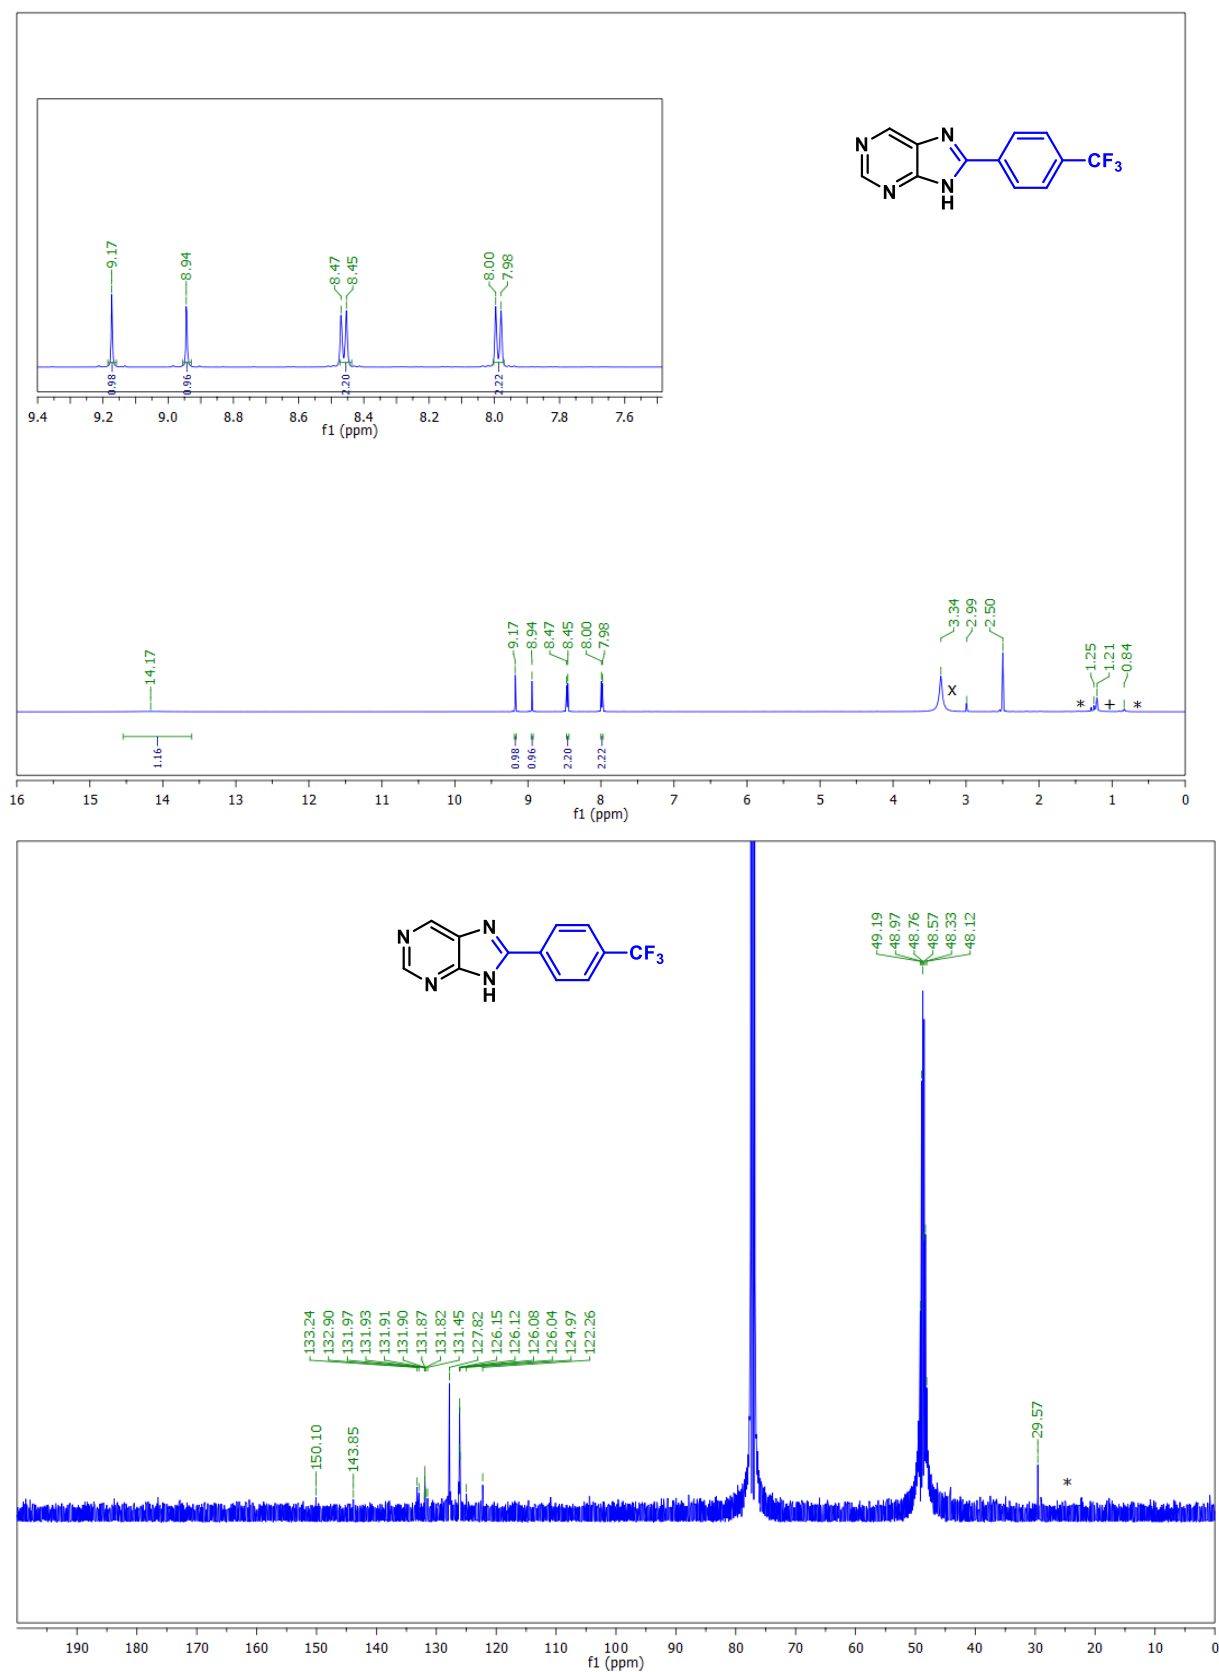

**Fig S40.** <sup>1</sup>H (in DMSO-d<sub>6</sub> solvent) and <sup>13</sup>C (in CDCl<sub>3</sub>+ 1drop CD<sub>3</sub>OD solvent) NMR spectra of **10g** (Xwater, +ethylacetate, \*hexane).

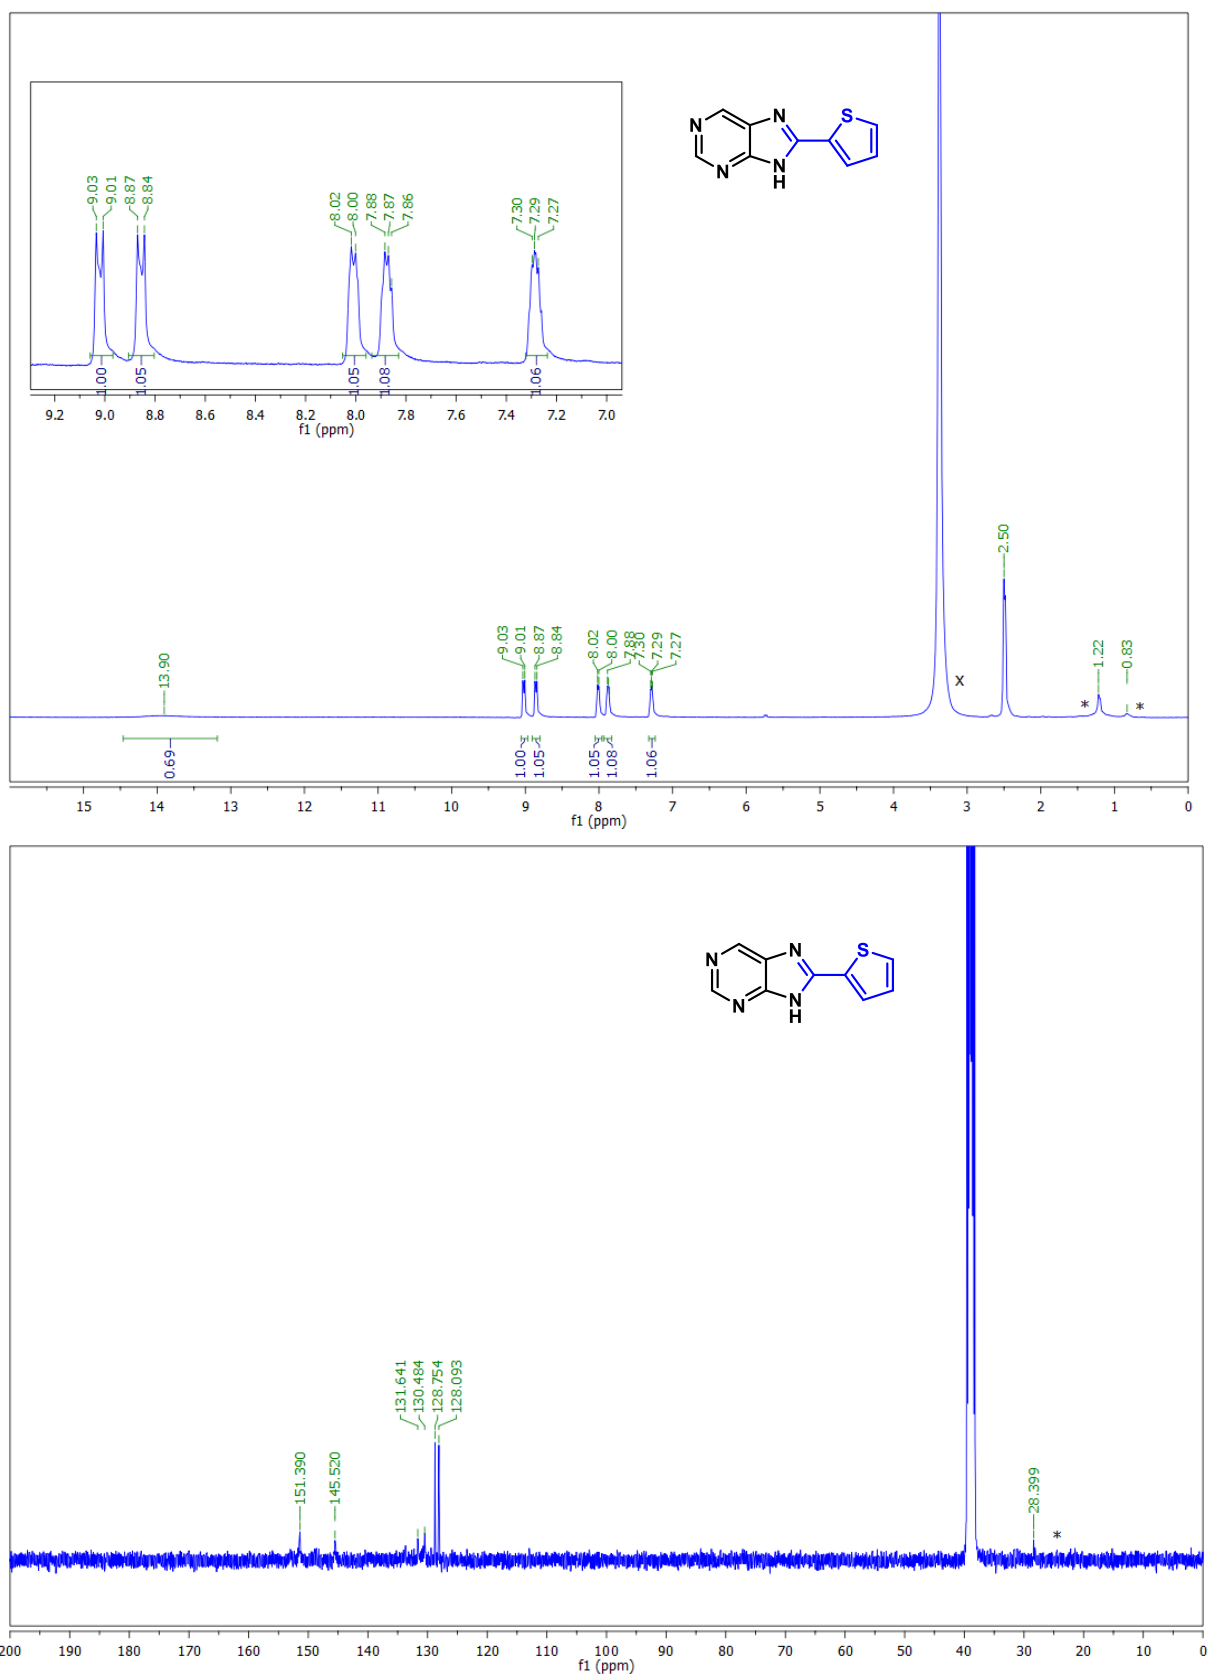

**Fig S41.** <sup>1</sup>H and <sup>13</sup>C NMR spectra of **10g** (in DMSO-d<sub>6</sub> solvent) (X water, \*hexane).

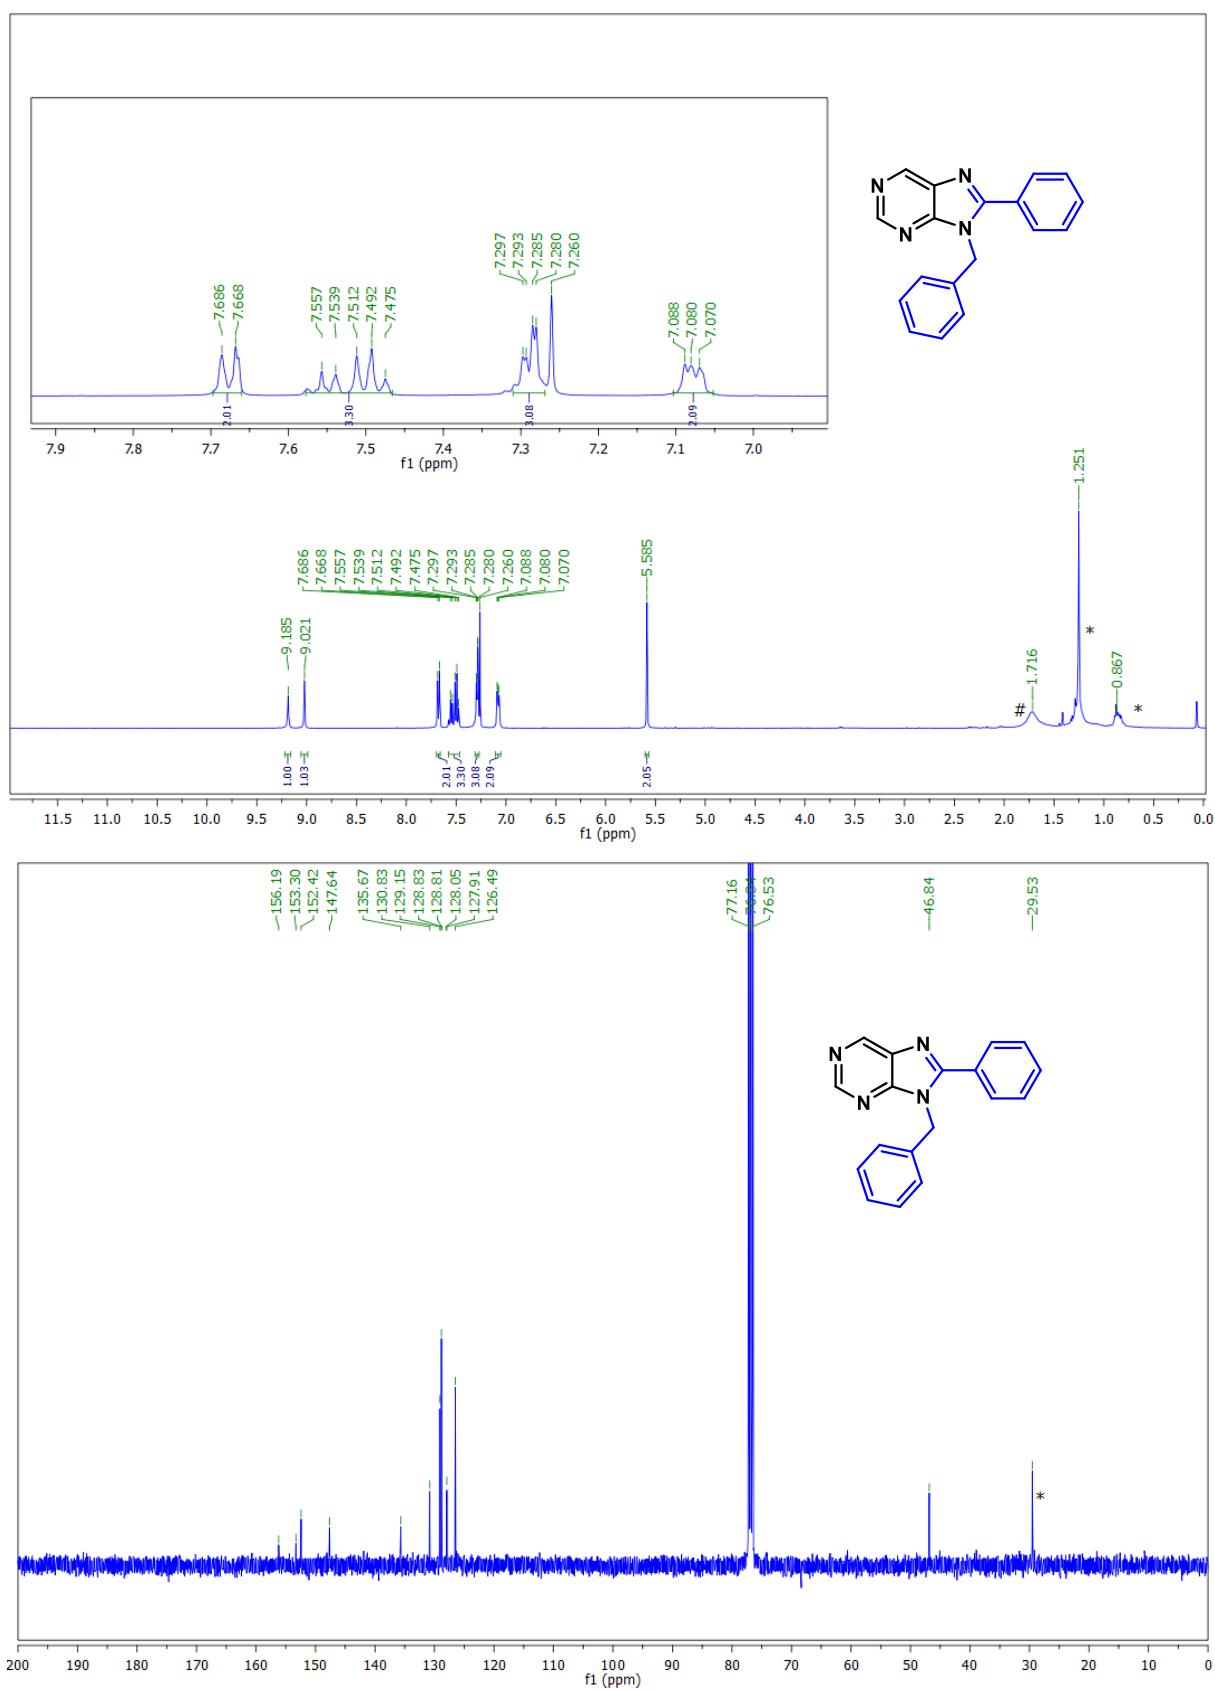

**Fig S42.**  $^1\text{H}$  and  $^{13}\text{C}$  NMR spectra of **11a** (in  $\text{CDCl}_3$  solvent) (# water, \* hexane).

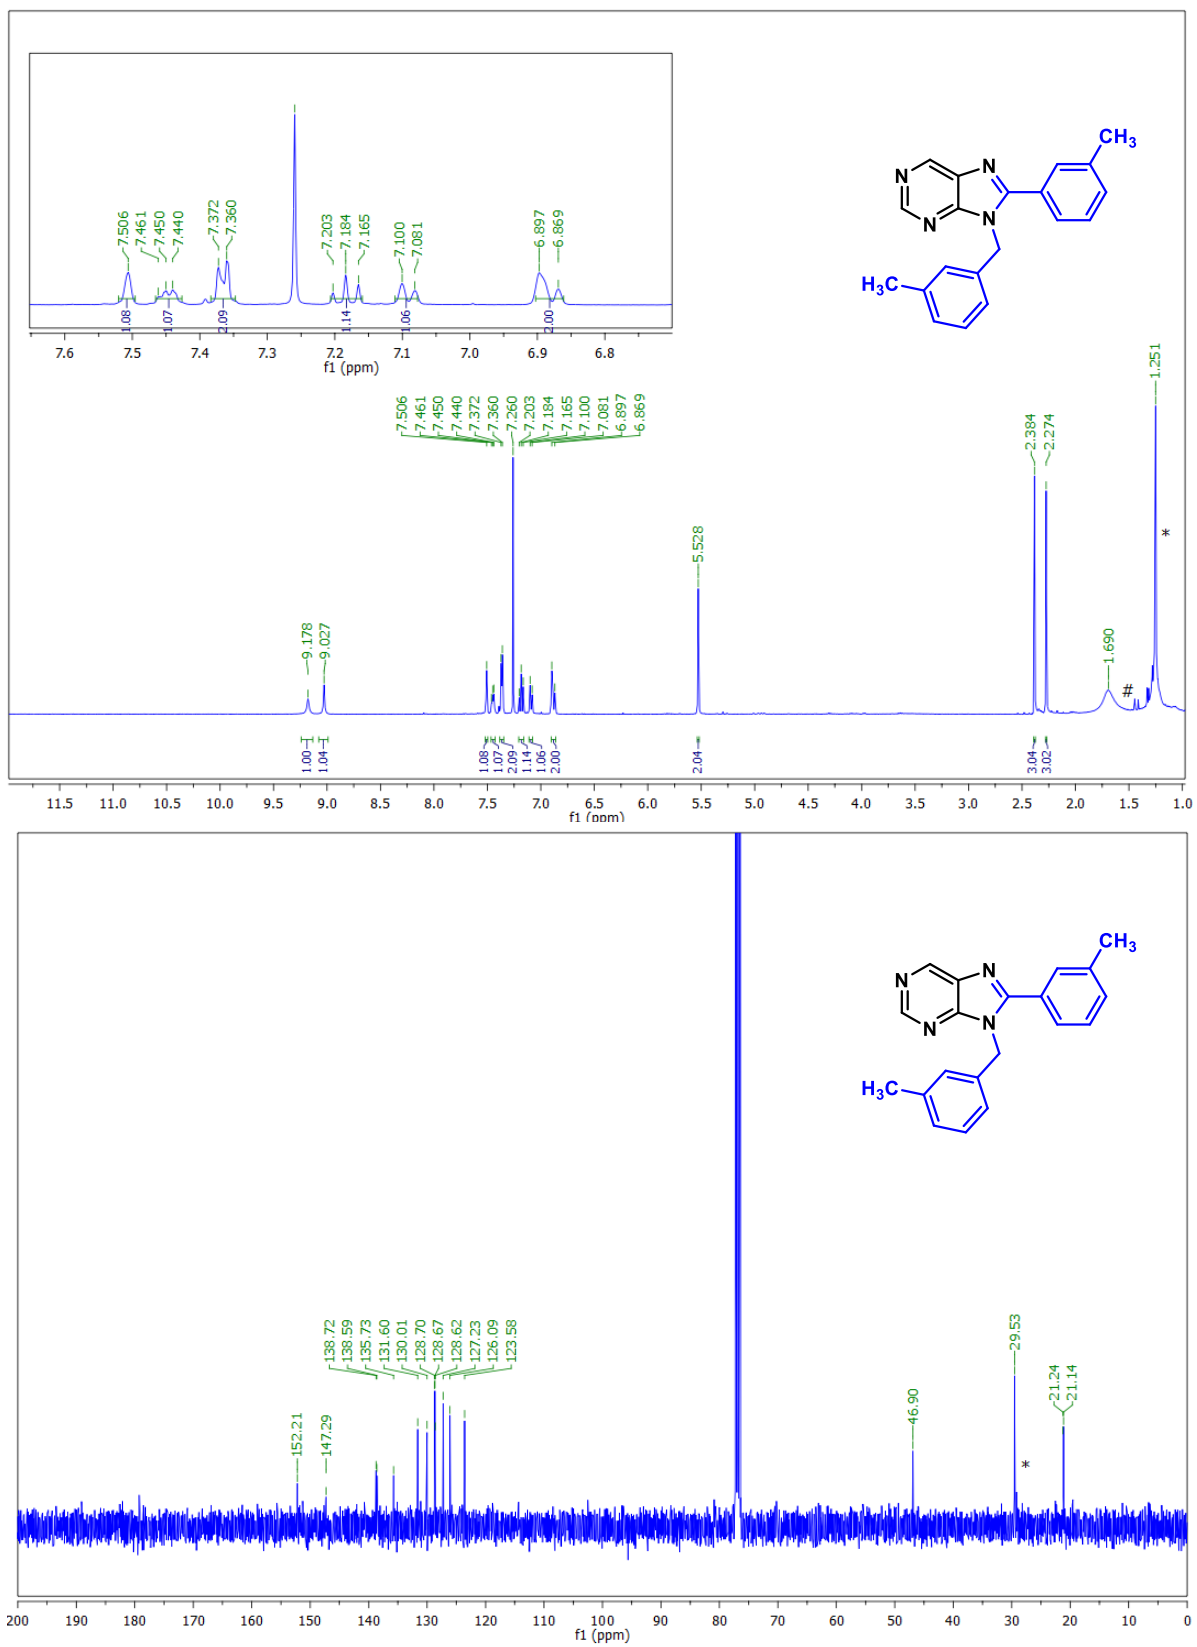

**Fig S43.** <sup>1</sup>H and <sup>13</sup>C NMR spectra of **11b** (in CDCl<sub>3</sub> solvent) (#water, \* hexane).

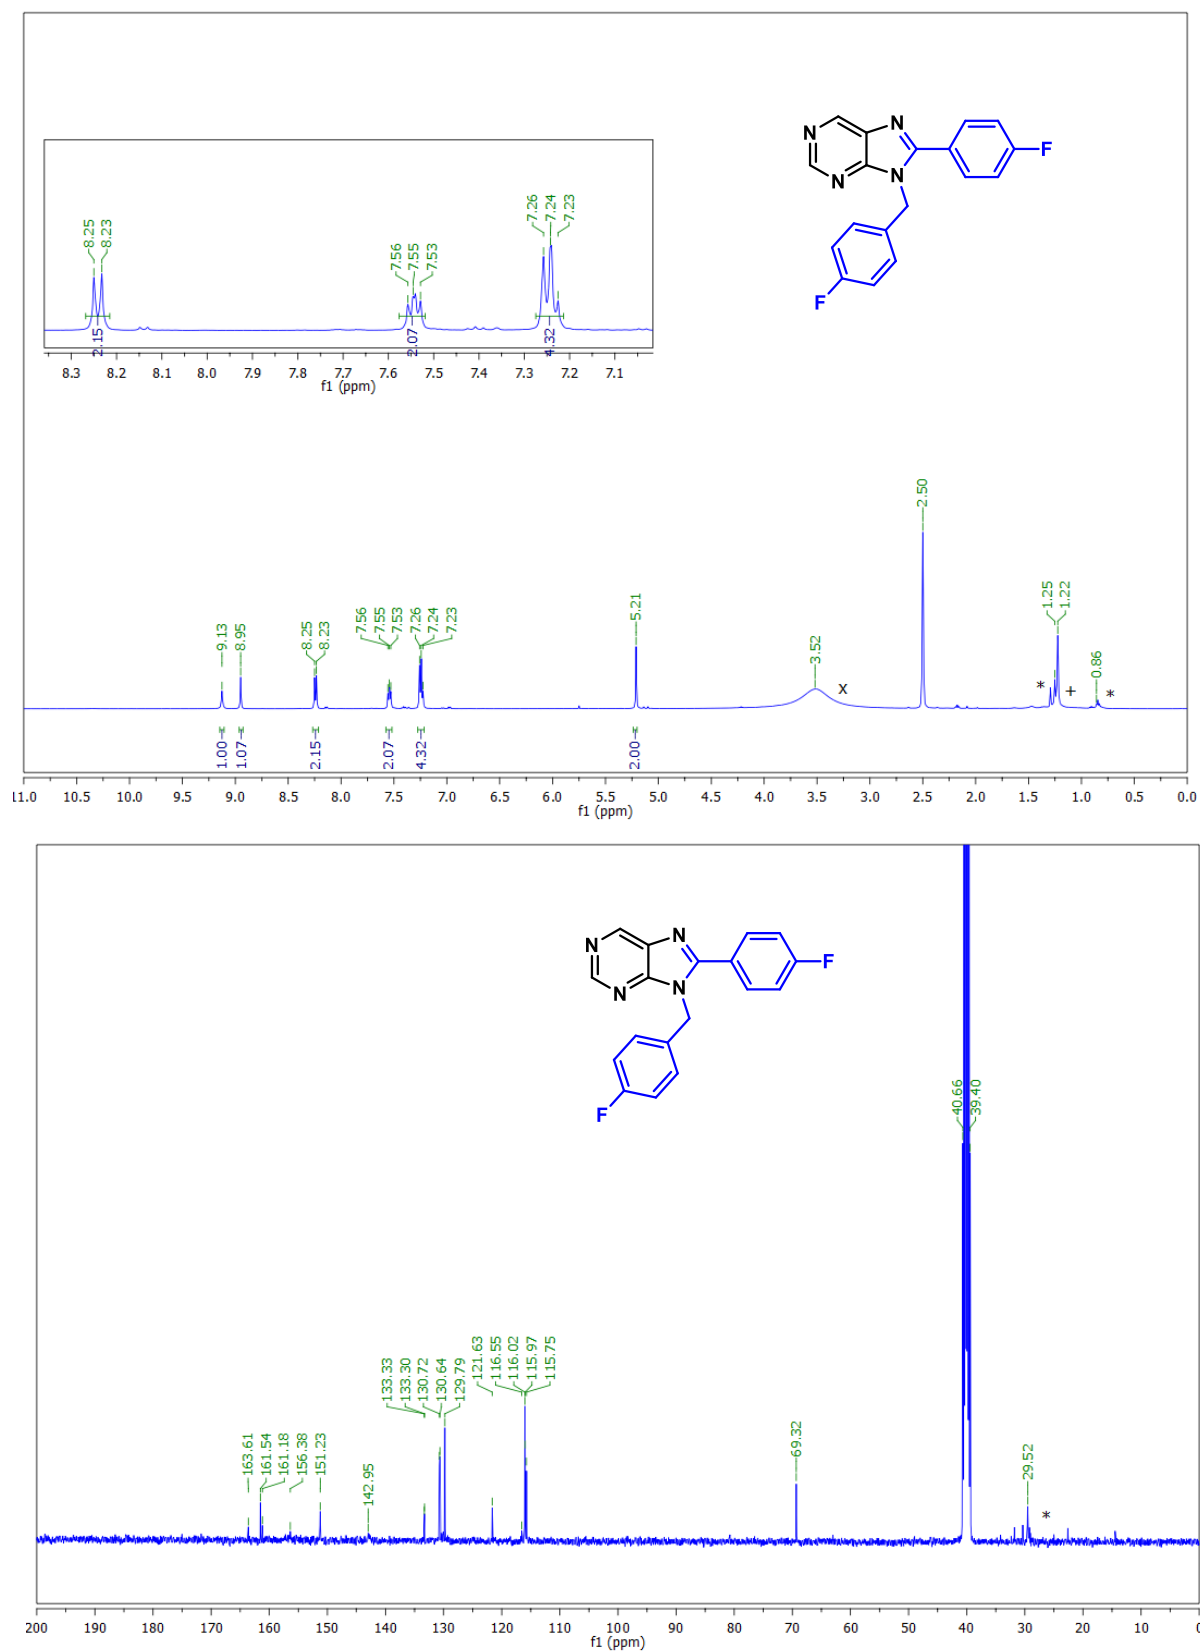

**Fig S44.** <sup>1</sup>H and <sup>13</sup>C NMR spectra of **11c** (in DMSO-d<sub>6</sub> solvent) (x water, + ethylacetate, \* hexane).

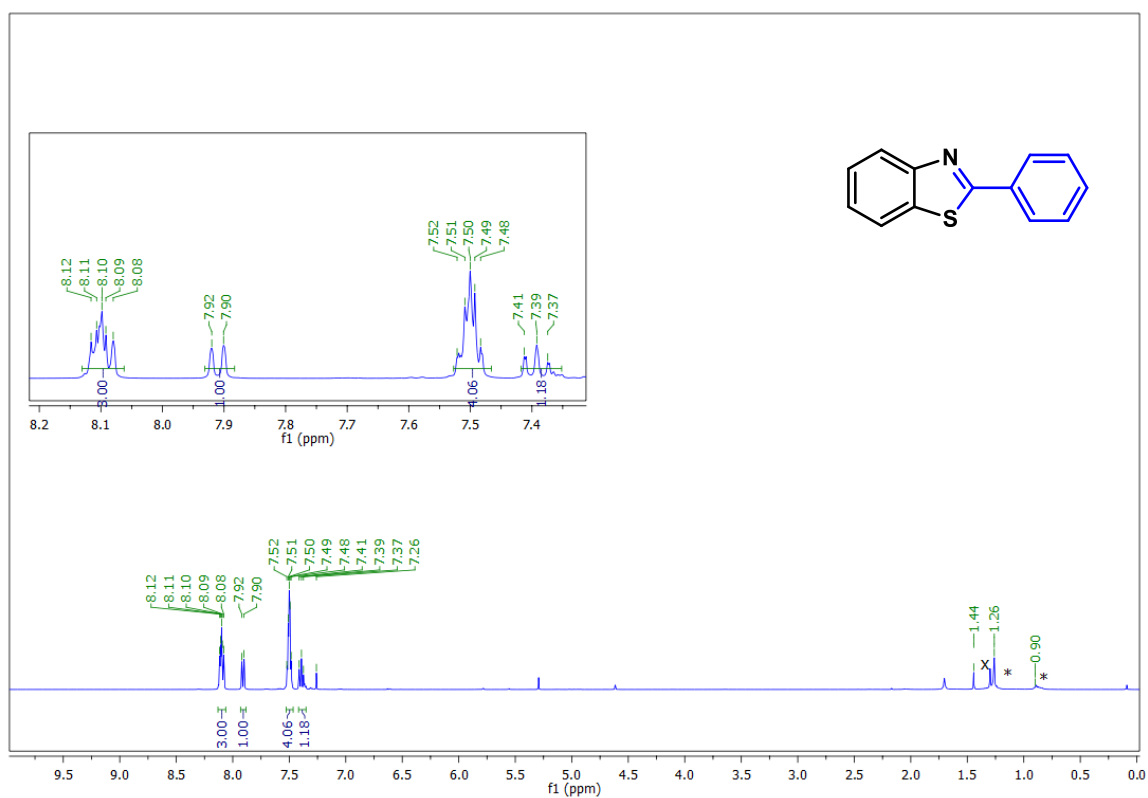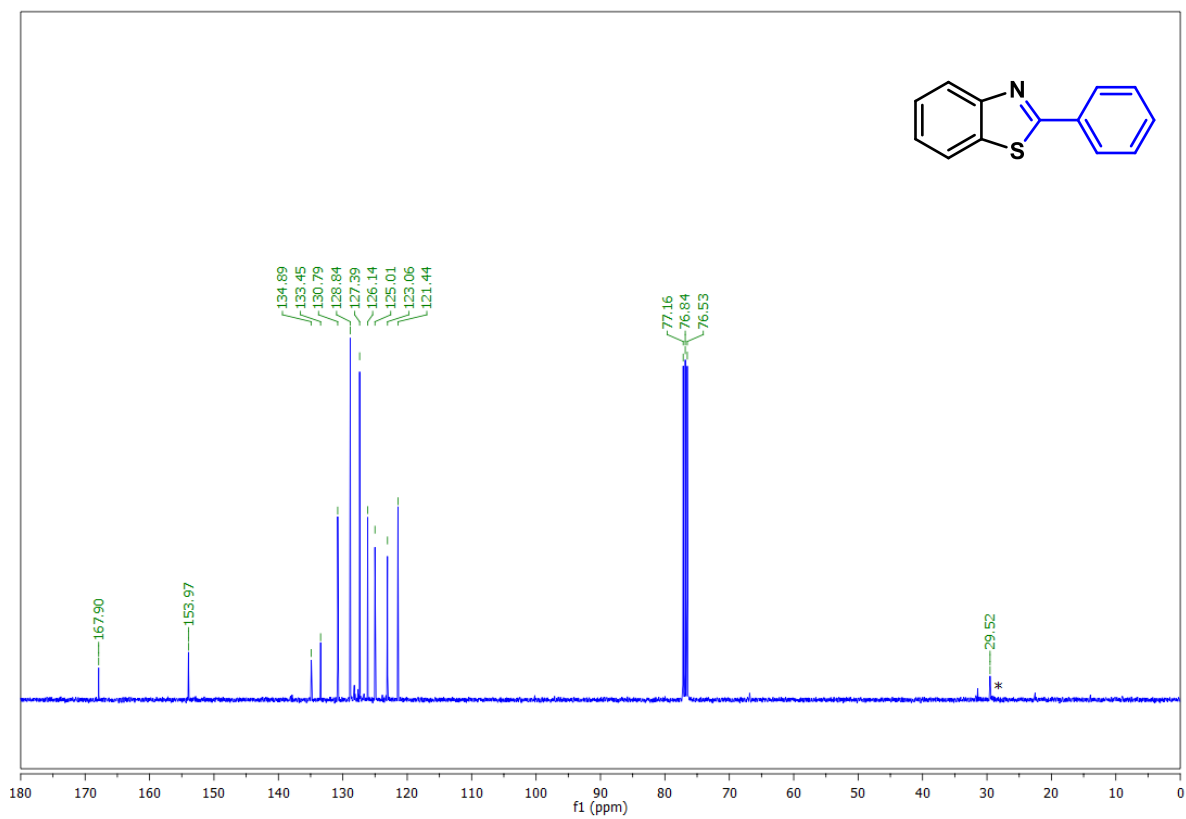

Fig S45.  $^1\text{H}$  and  $^{13}\text{C}$  NMR spectra of **12a** (in  $\text{CDCl}_3$  solvent) ( $^x$ water,  $^*$ hexane).



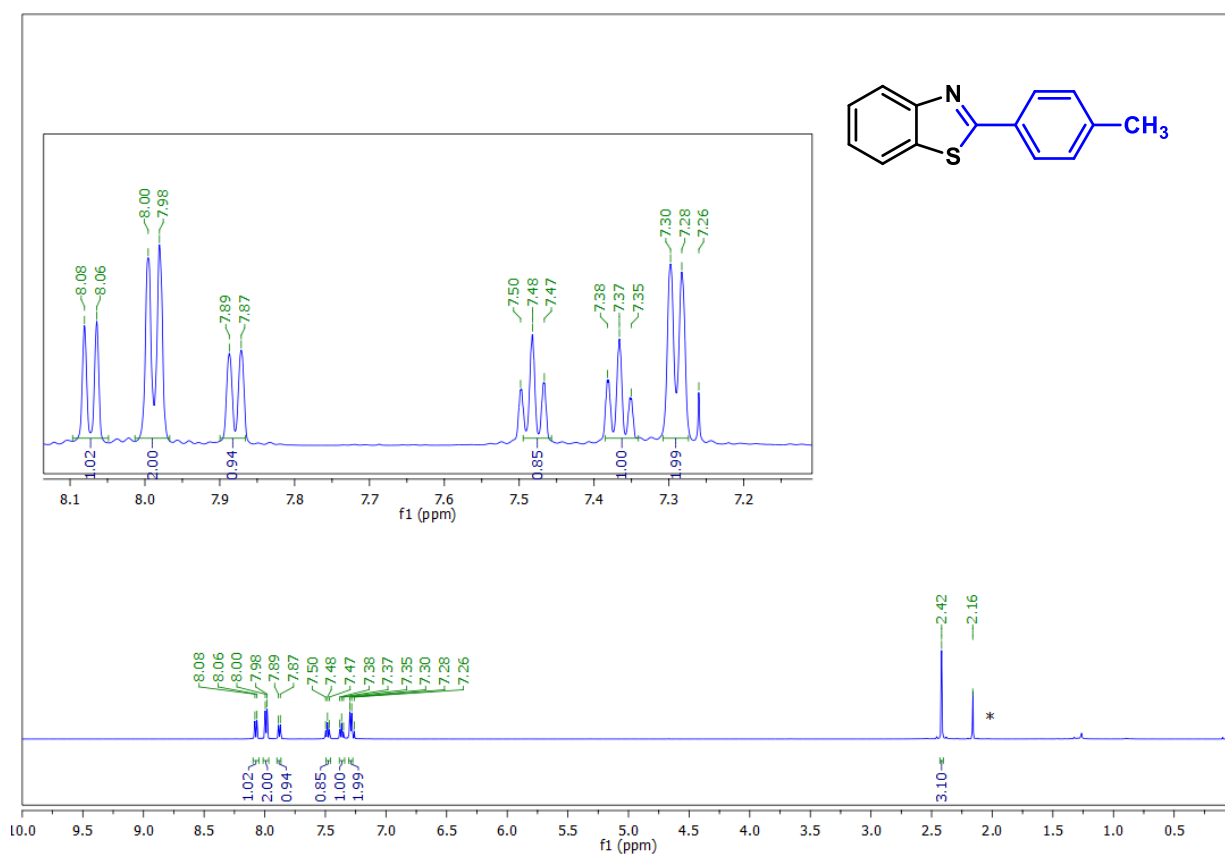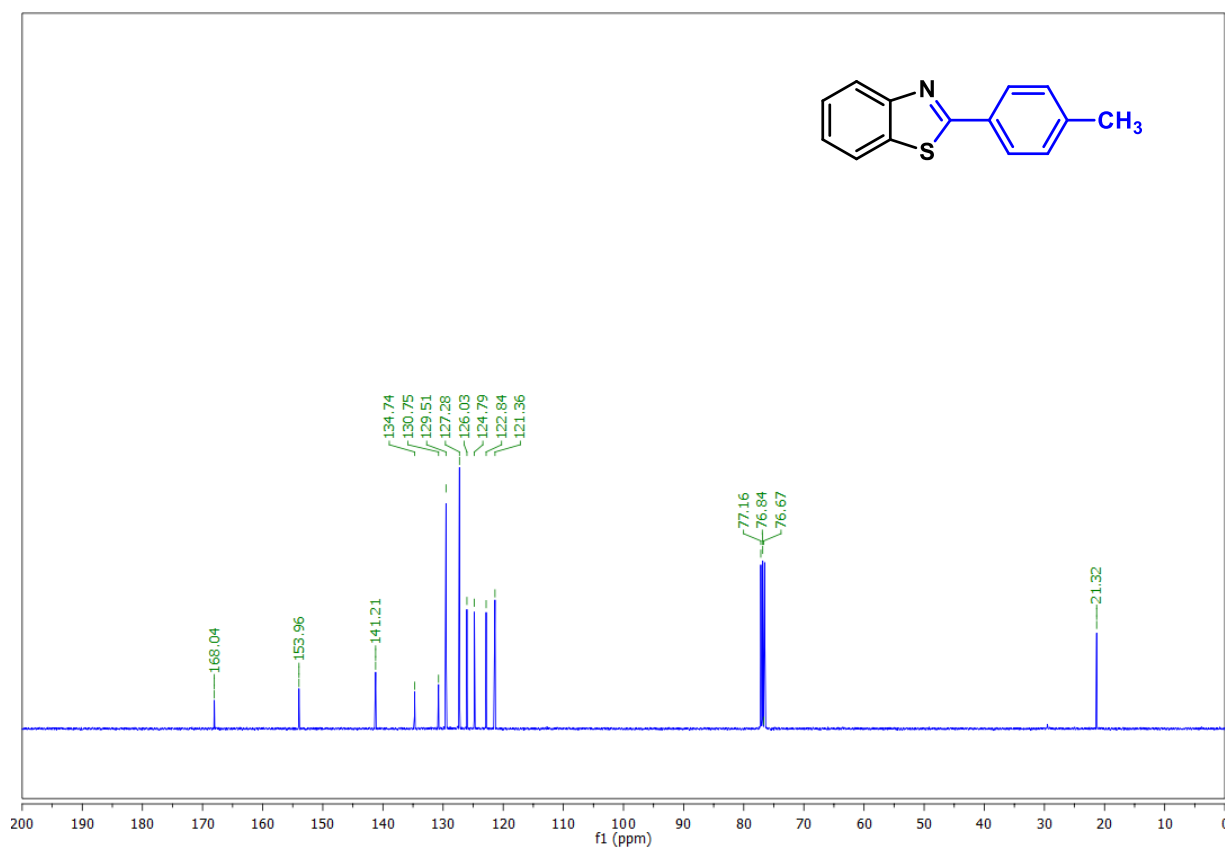

**Fig S46.** <sup>1</sup>H and <sup>13</sup>C NMR spectra of **12b** (in CDCl<sub>3</sub> solvent) (\* acetone).

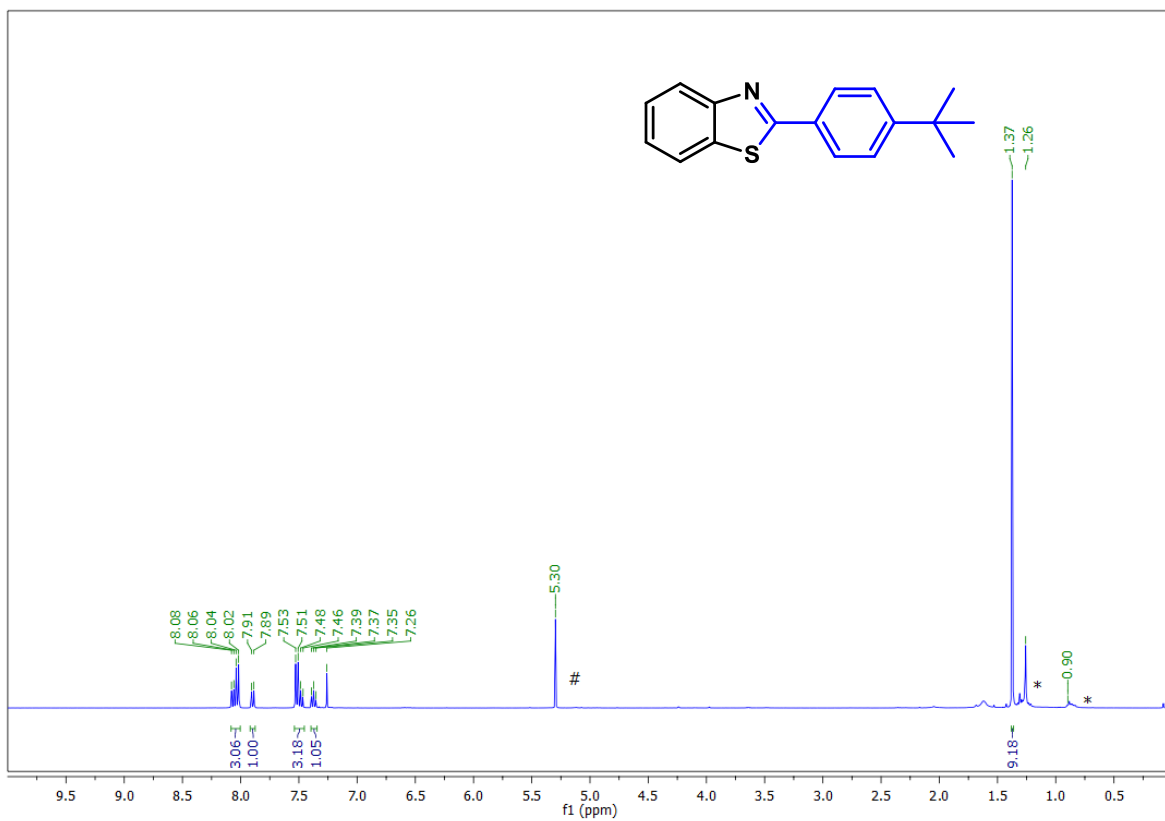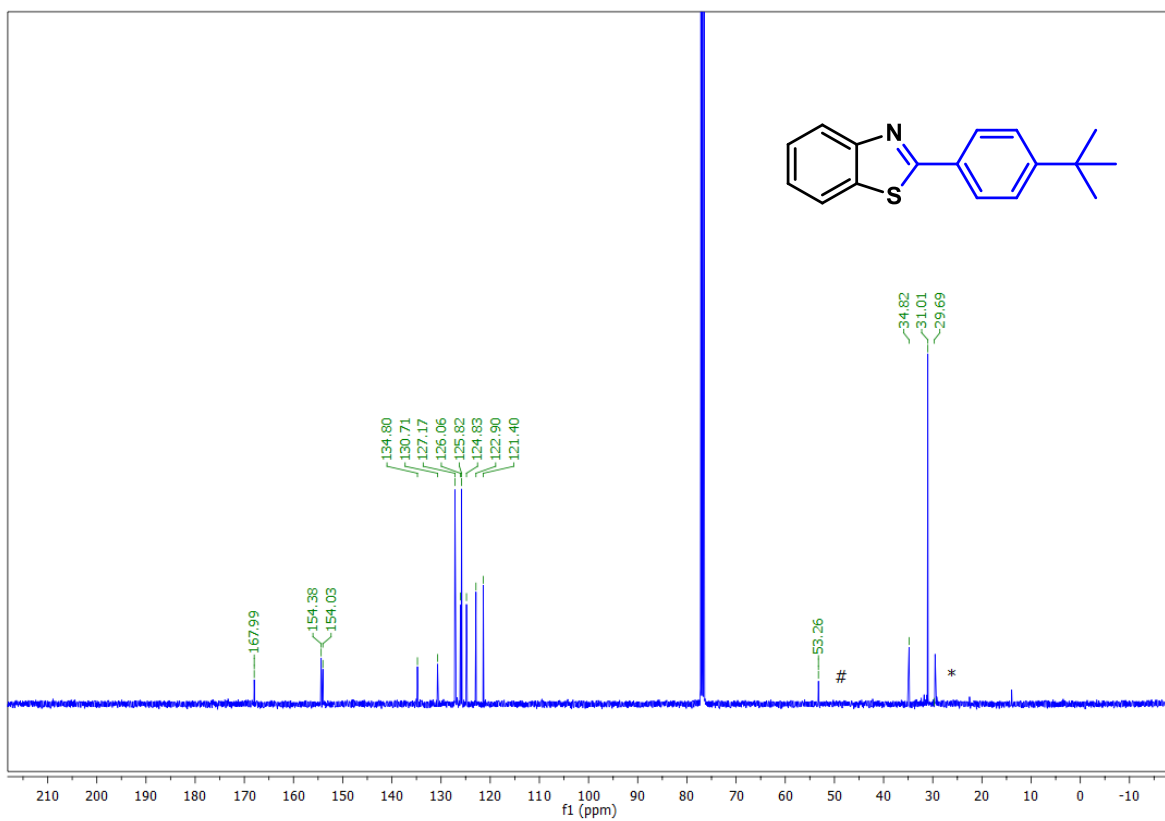

**Fig S47.** <sup>1</sup>H and <sup>13</sup>C NMR spectra of **12c** (in CDCl<sub>3</sub> solvent) (\*hexane, # dichloromethane).

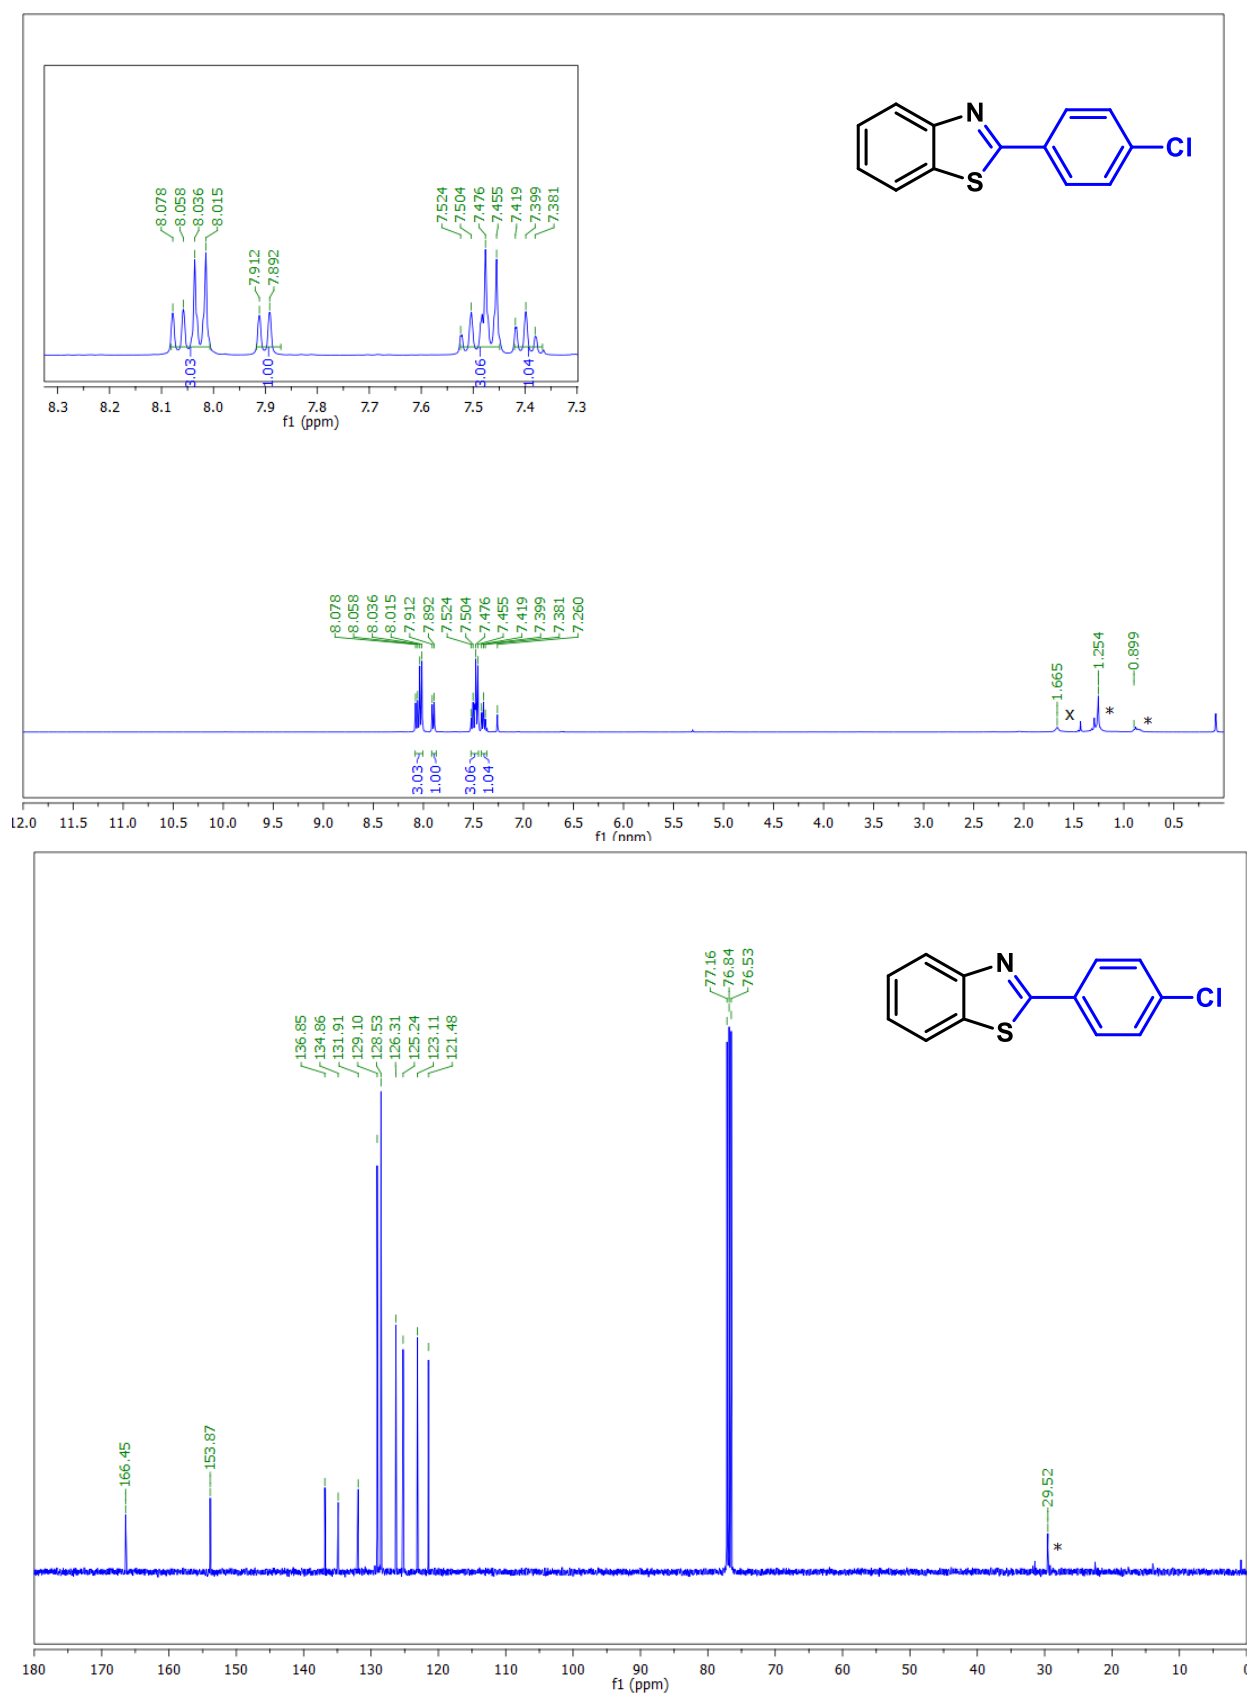

**Fig S48.** <sup>1</sup>H and <sup>13</sup>C NMR spectra of **12d** (in CDCl<sub>3</sub> solvent) (\*hexane, <sup>x</sup>water).

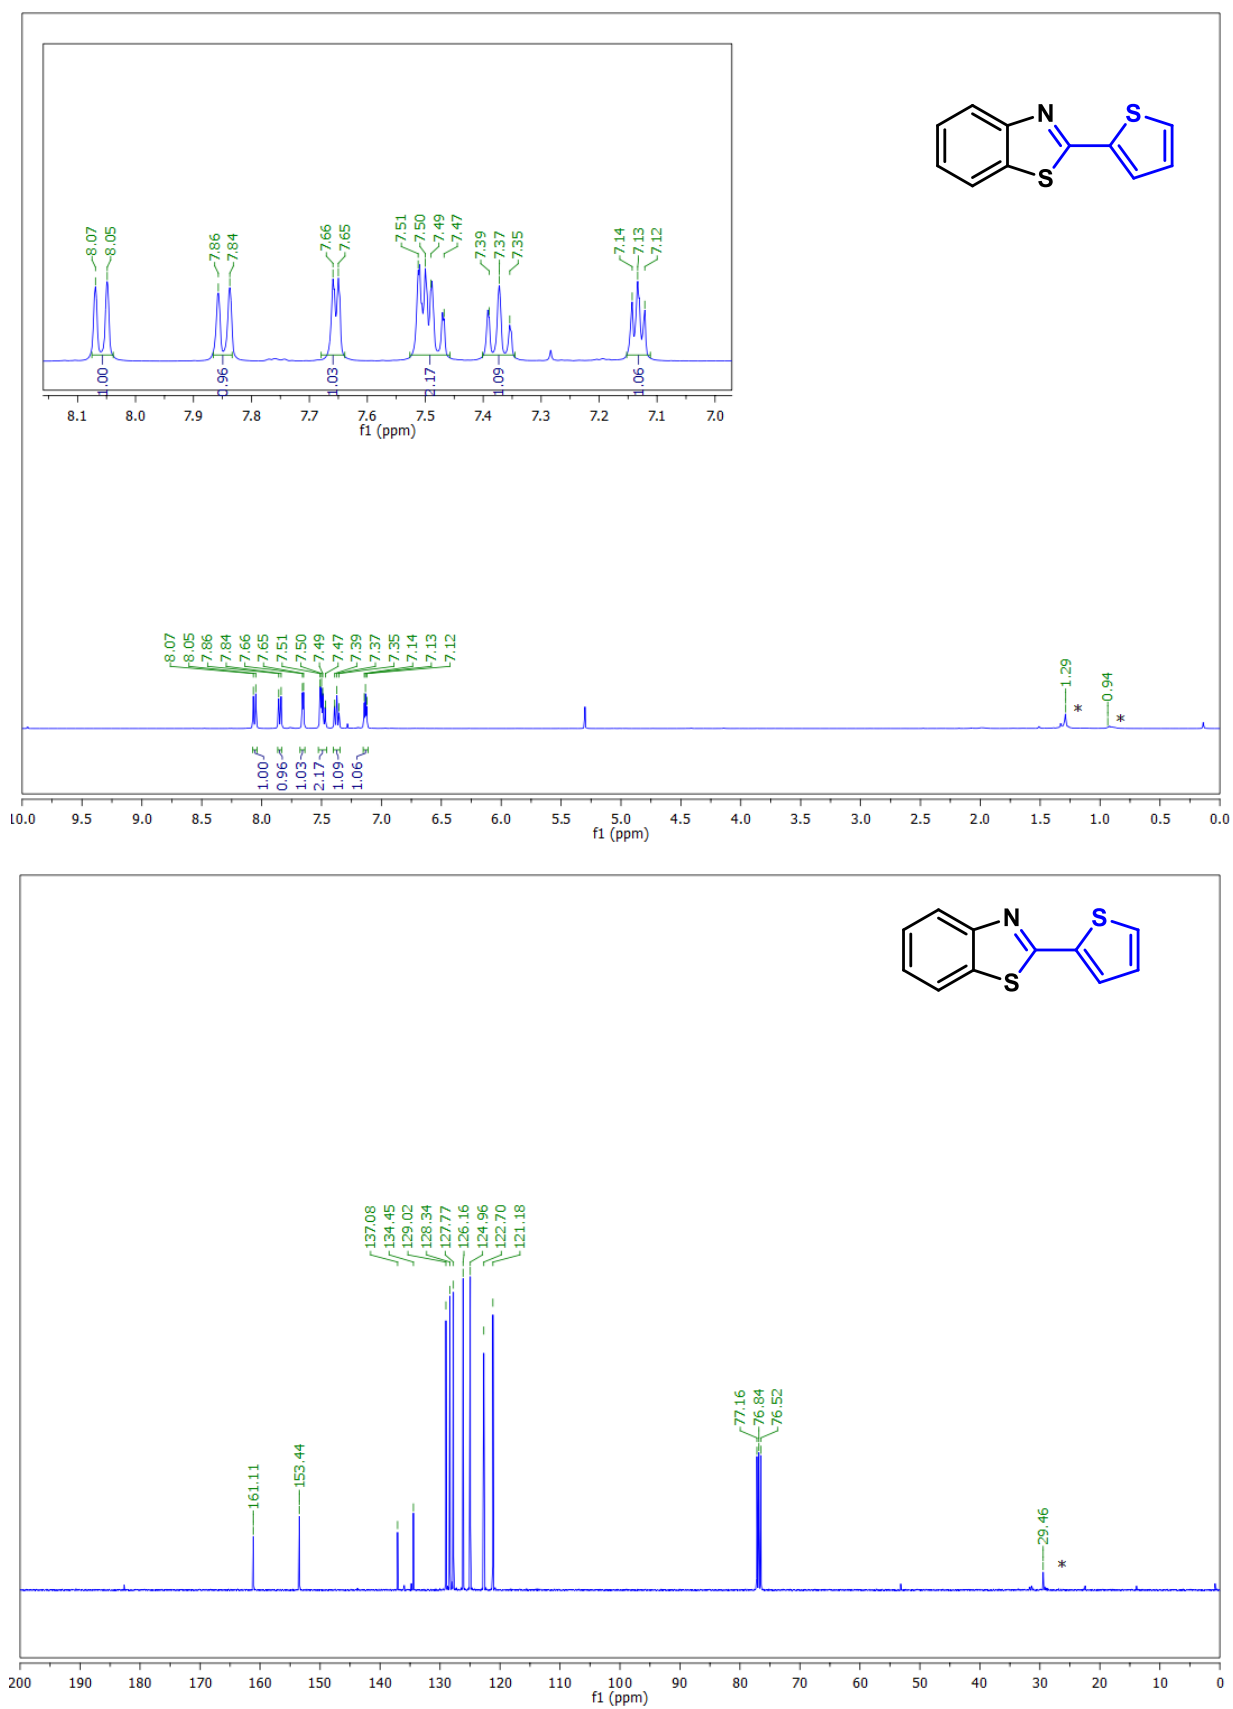

**Fig S49.** <sup>1</sup>H and <sup>13</sup>C NMR spectra of **12e** (in CDCl<sub>3</sub> solvent) (\*hexane).

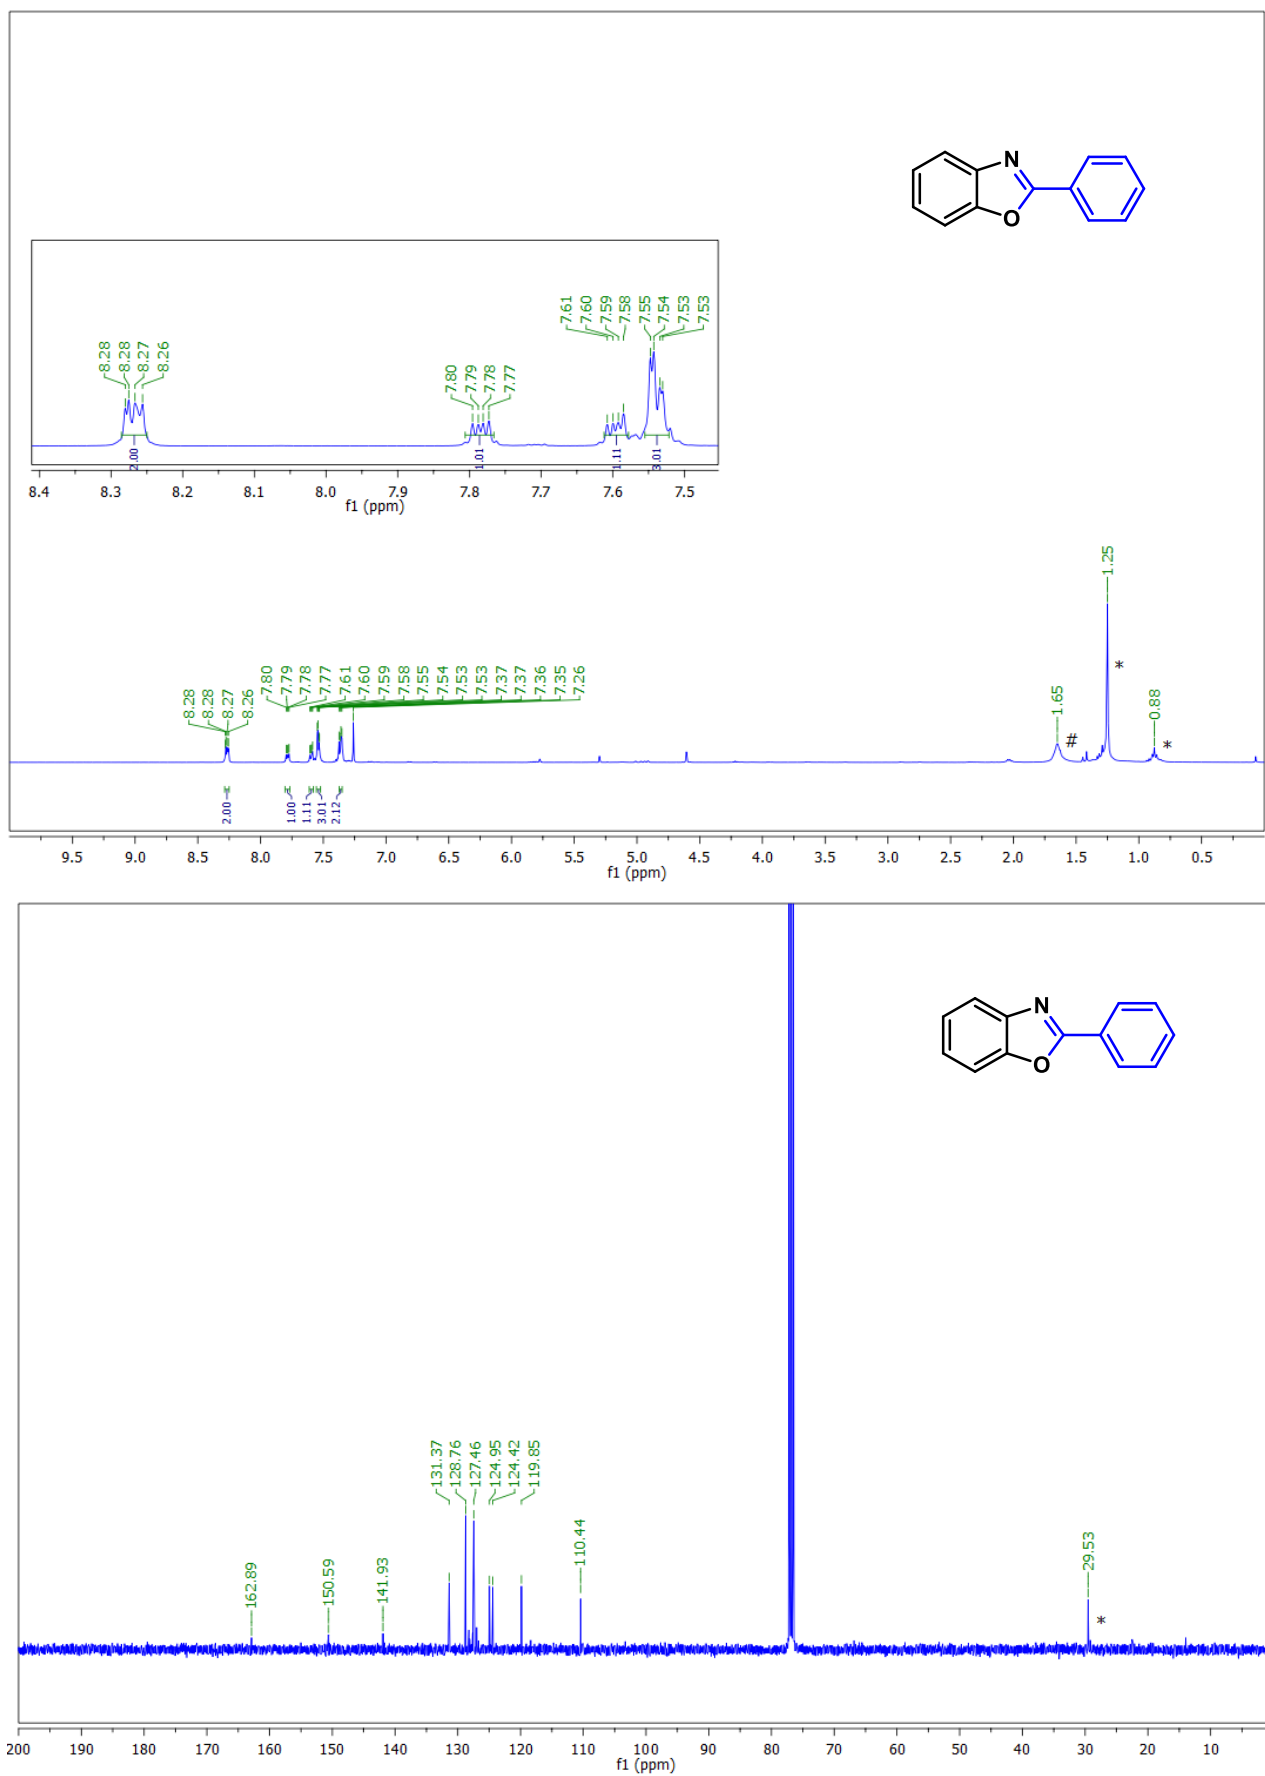

**Fig S50.** <sup>1</sup>H and <sup>13</sup>C NMR spectra of **13a** (in CDCl<sub>3</sub> solvent) (#water, \*hexane).

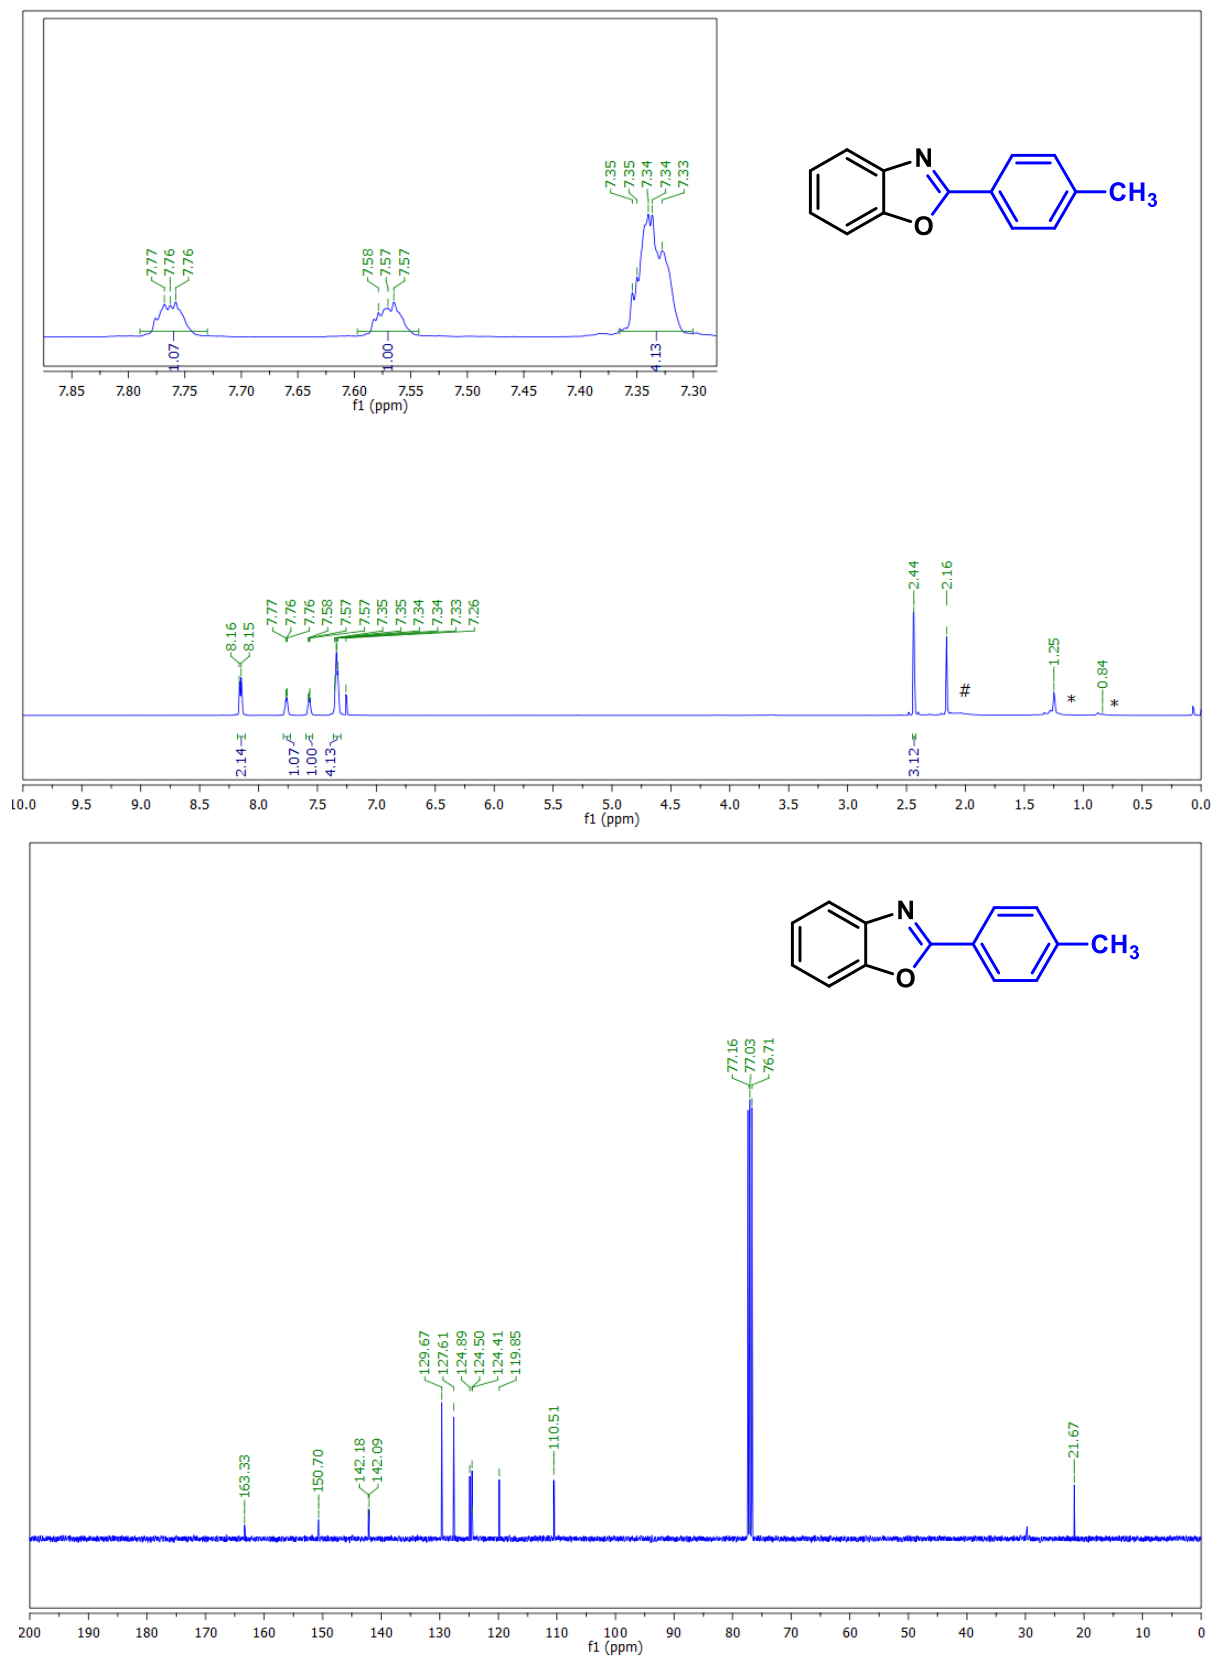

**Fig S51.**  $^1\text{H}$  and  $^{13}\text{C}$  NMR spectra of **13b** (in  $\text{CDCl}_3$  solvent) (#acetone, \*hexane).

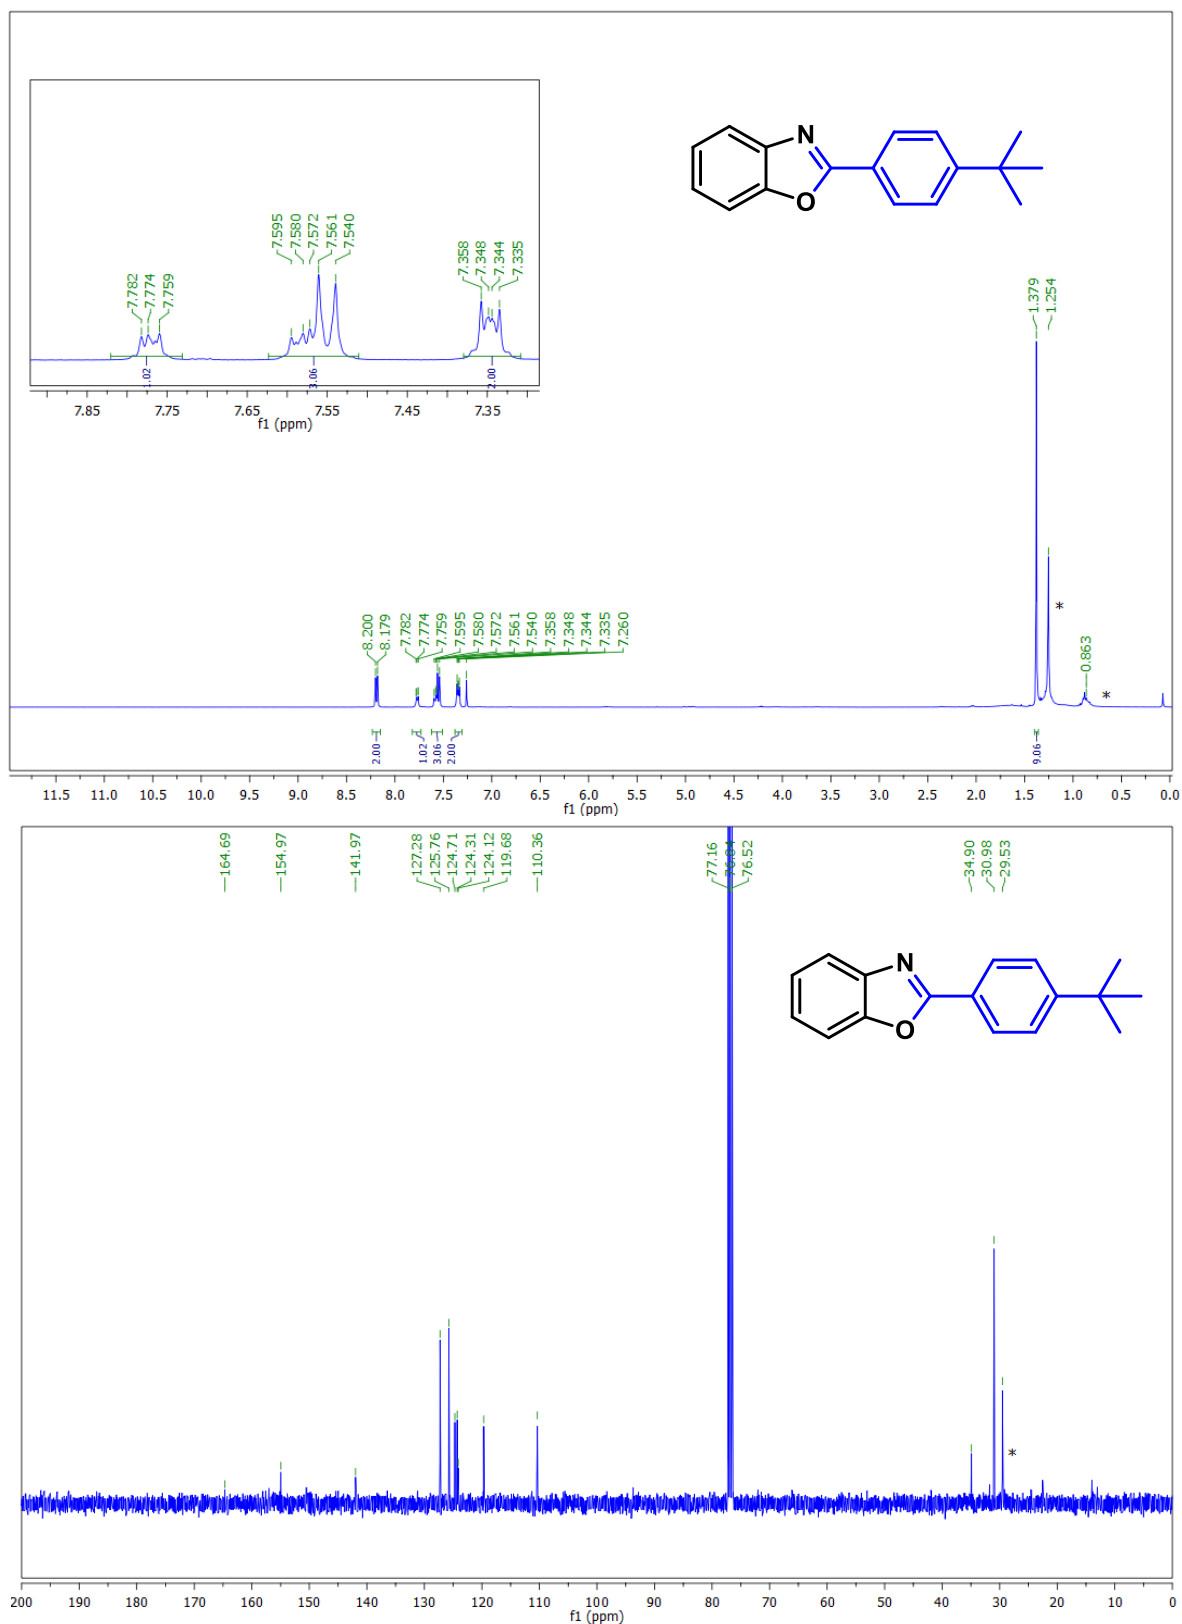

**Fig S52.** <sup>1</sup>H and <sup>13</sup>C NMR spectra of **13c** (in CDCl<sub>3</sub> solvent) (\* hexane).

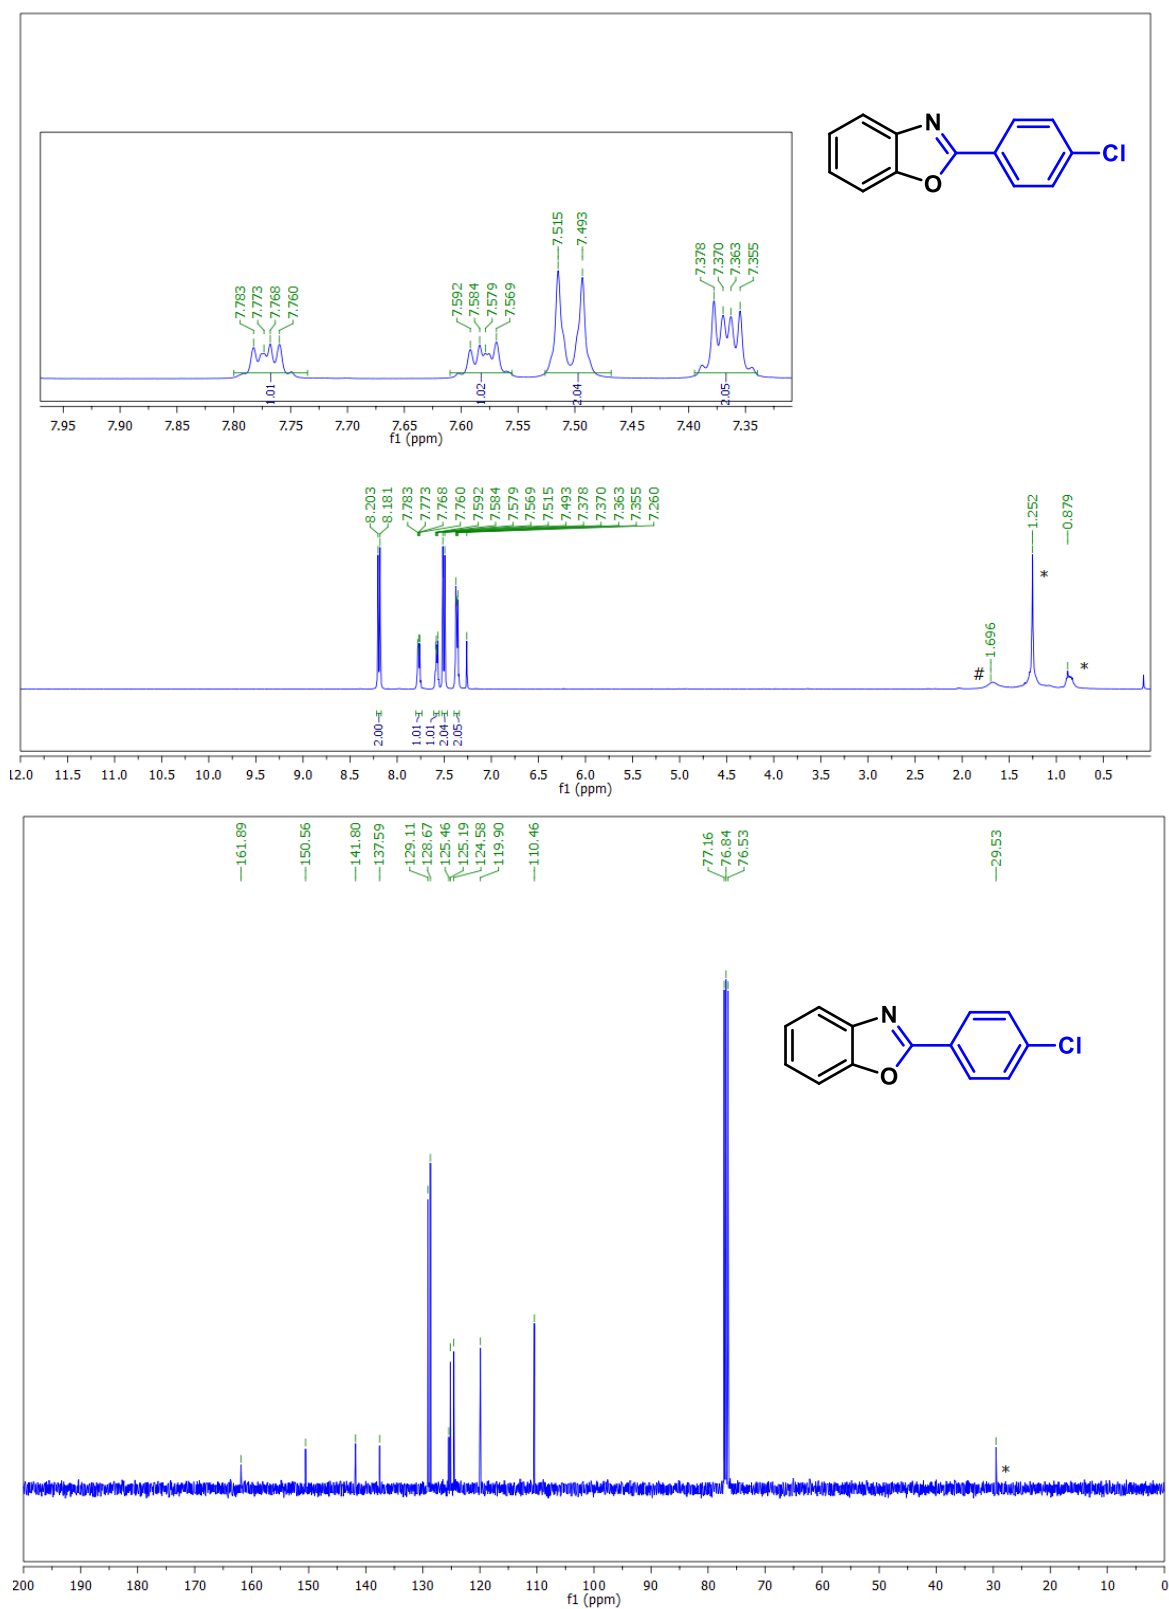

**Fig S53.** <sup>1</sup>H and <sup>13</sup>C NMR spectra of **13d** (in CDCl<sub>3</sub> solvent, #water, \*hexane).



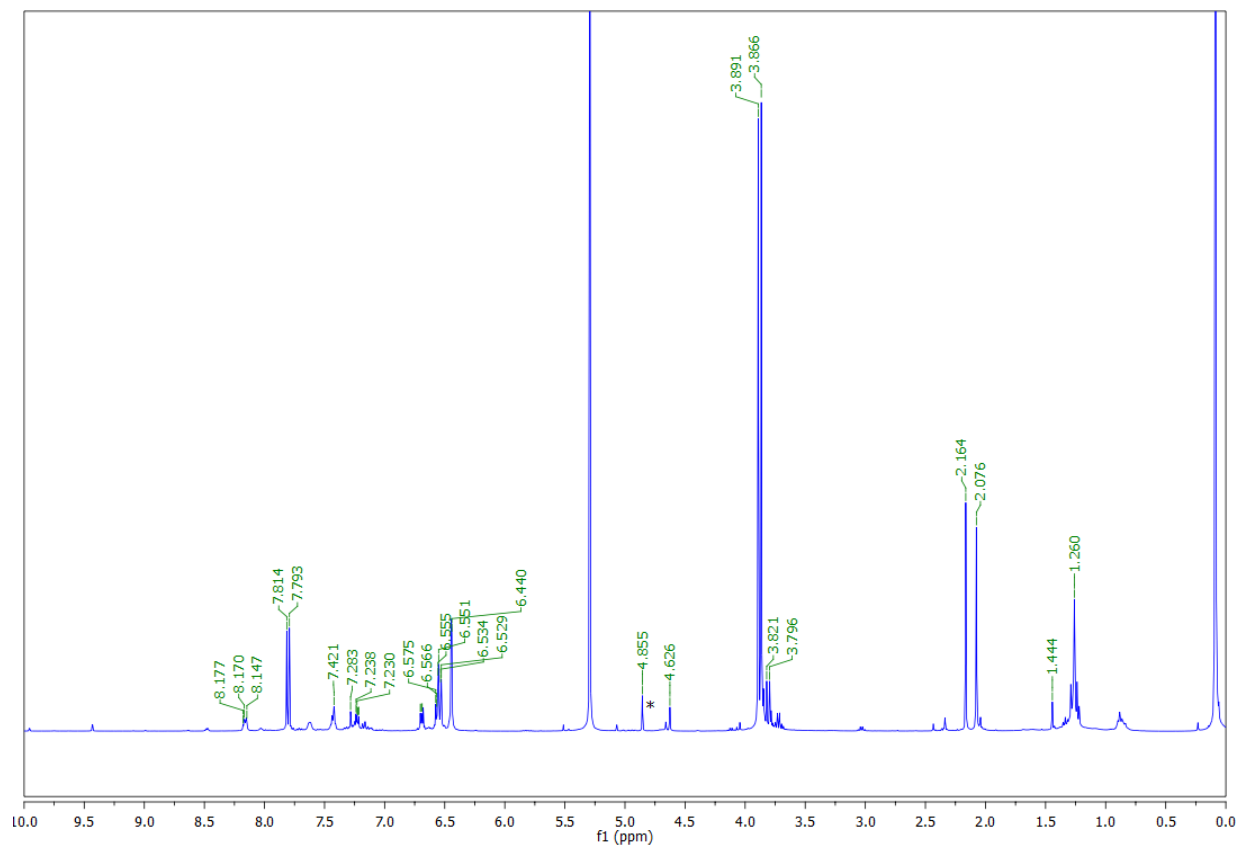

**Fig S54.** <sup>1</sup>H NMR spectrum of reaction mixture (in CDCl<sub>3</sub> solvent) (\* 2,4-dimethoxybenzyl alcohol)<sup>1</sup>

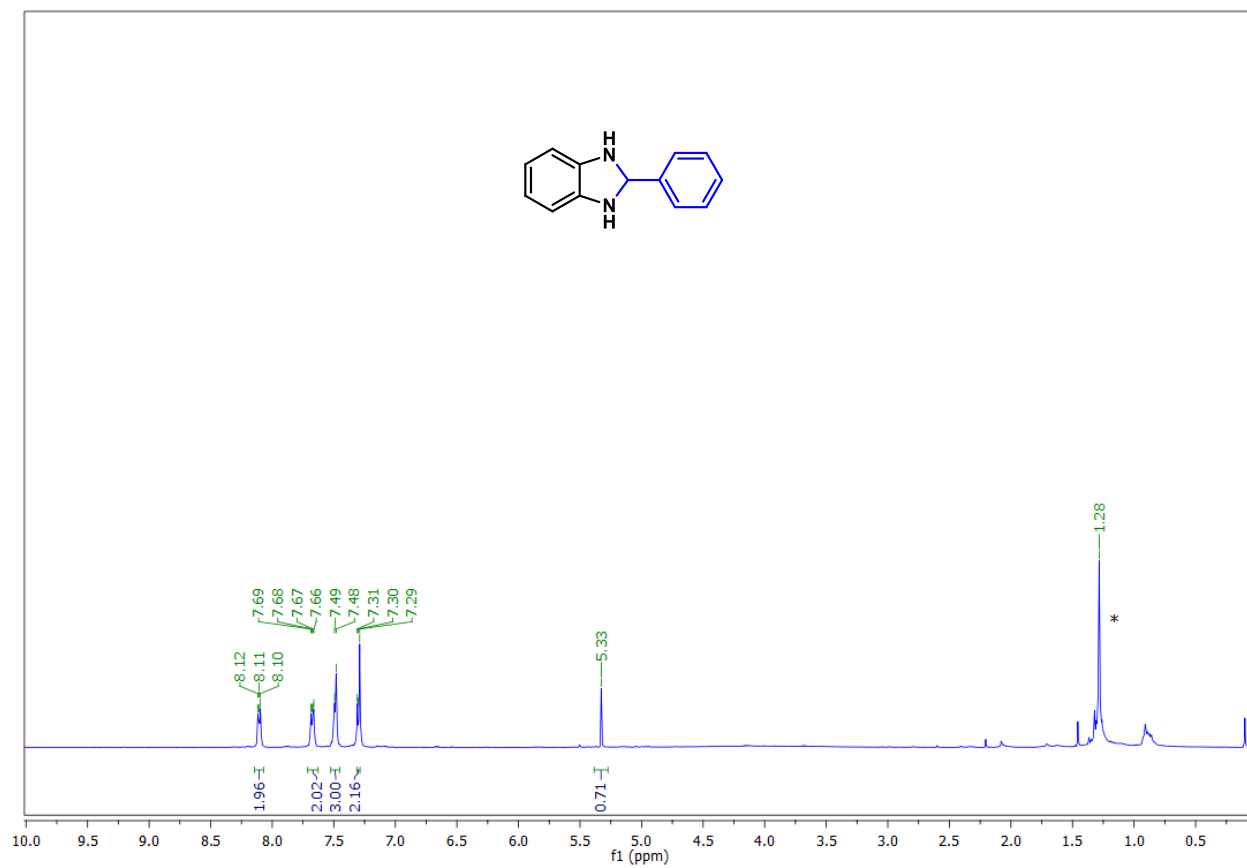

**Fig S55.**  $^1\text{H}$  NMR spectrum of **5a'** (in  $\text{CDCl}_3$  solvent) (\* hexane)

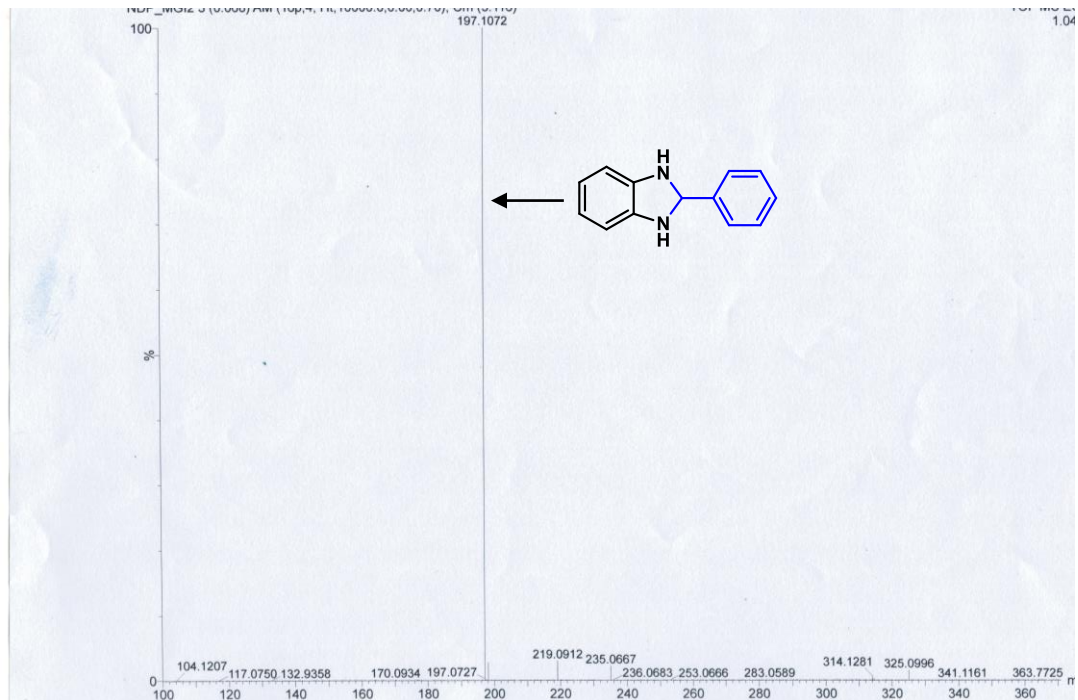

**Figure S56.** ESI-MS spectrum of  $[\text{C}_{13}\text{H}_{13}\text{N}_2]^+$  ( $[\mathbf{5a}' + \text{H}]^+$ ).

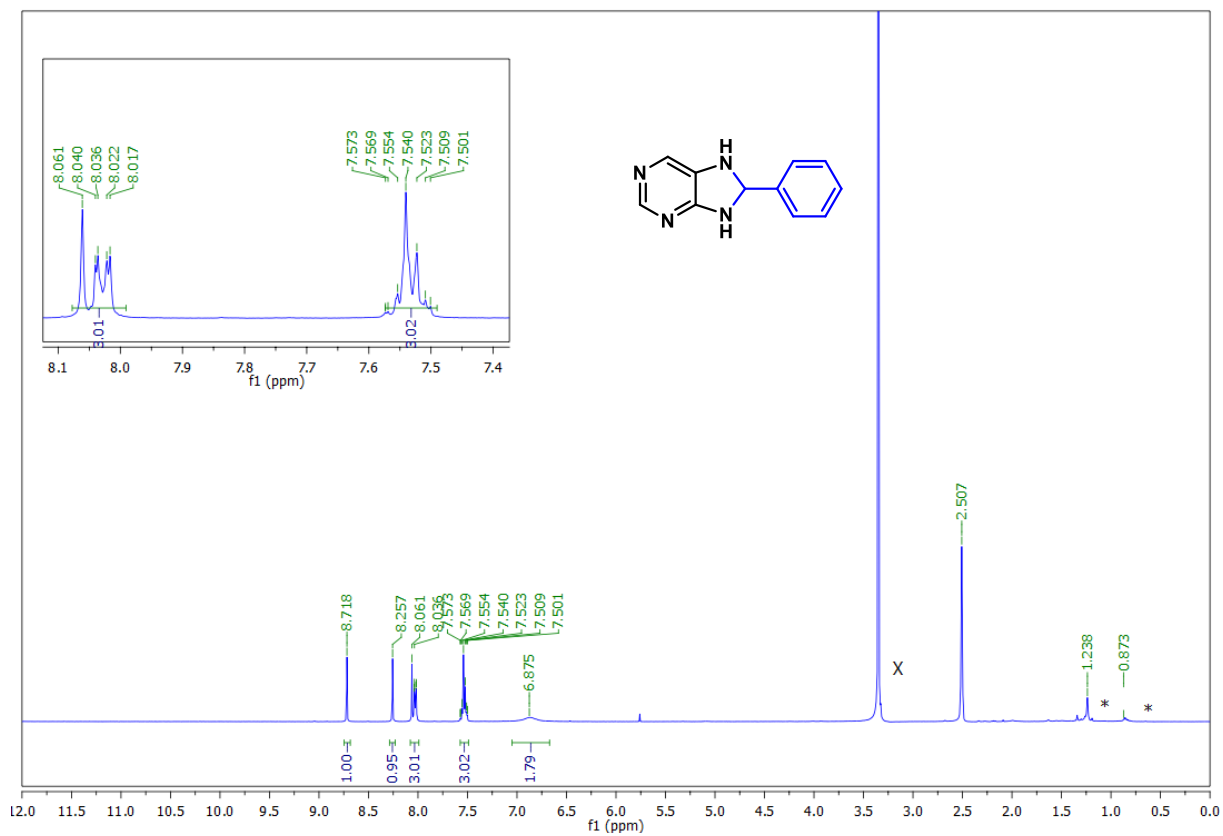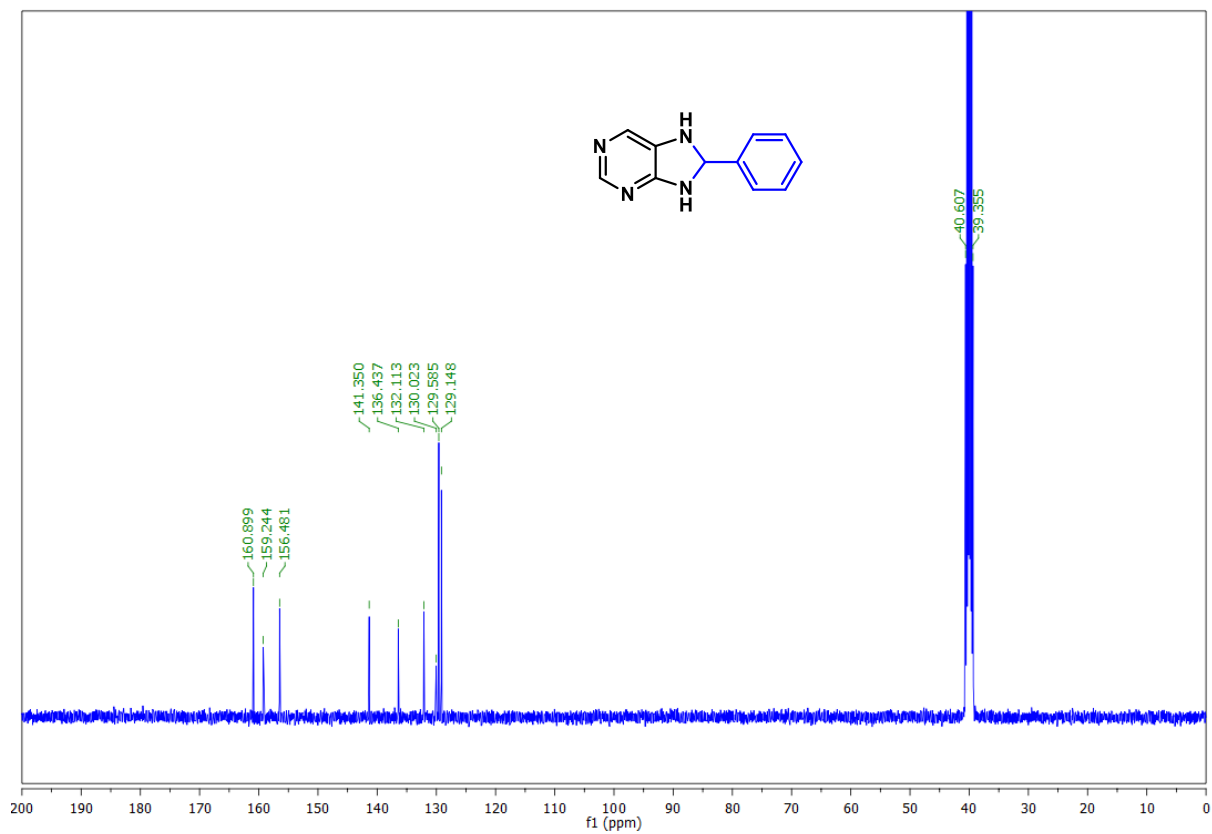

**Fig S57.** <sup>1</sup>H and <sup>13</sup>C NMR spectra of 10a' (in DMSO-d<sub>6</sub> solvent) (X water, \*hexane).

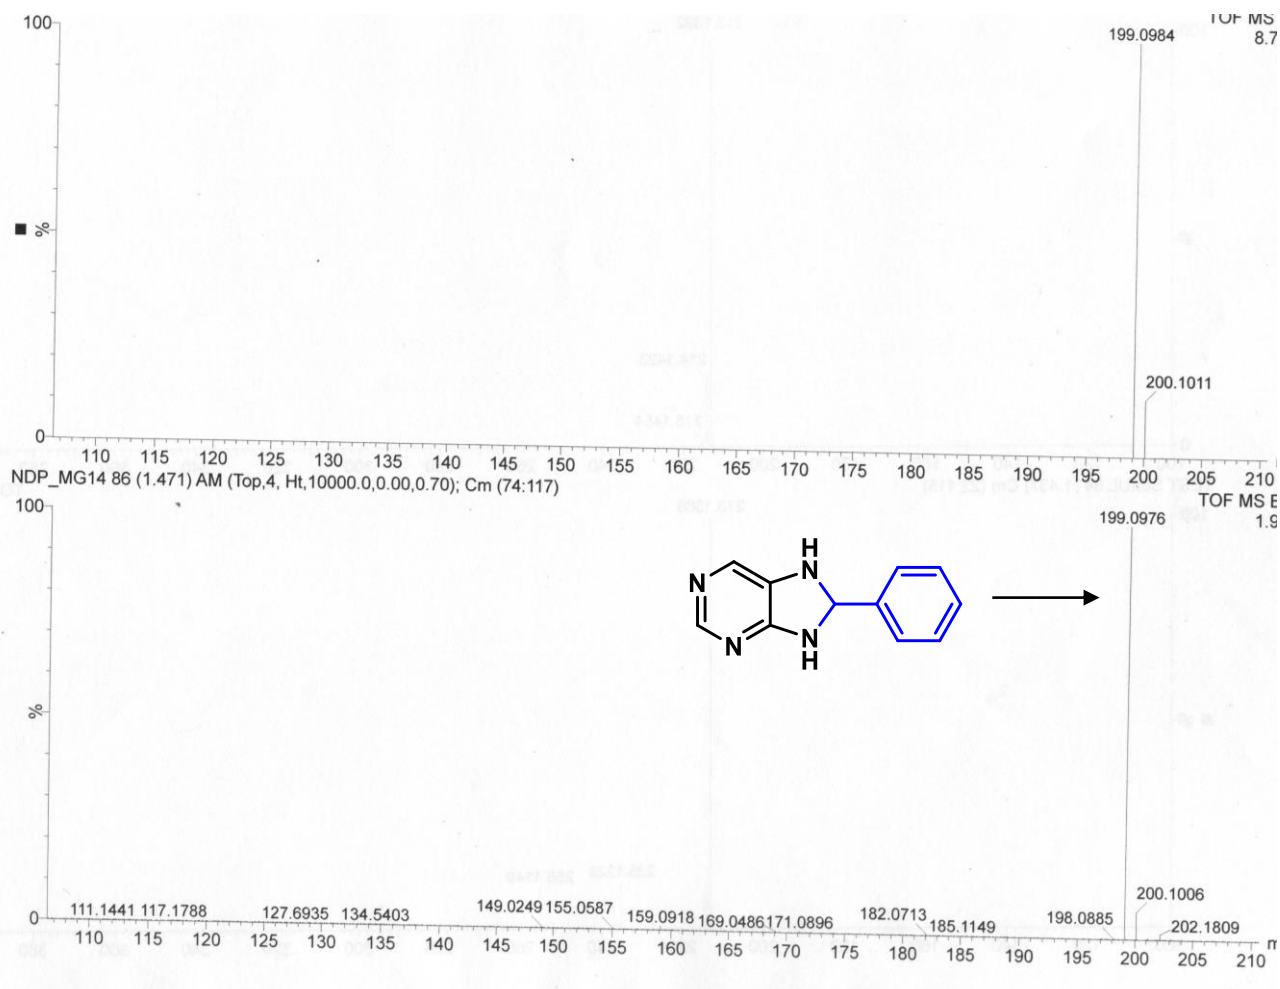

**Figure S58.** ESI-MS spectrum of  $[C_{11}H_{11}N_4]^+$  ( $[10a^+ + H]^+$ ).

## References.

- 1 (a) S. Parua, R. Sikari, S. Sinha, S. Das, G. Chakraborty and N. D. Paul, *Org. Biomol. Chem.*, 2018, **16**, 274–284; (b) S. Parua, S. Das, R. Sikari, S. Sinha and N. D. Paul, *J. Org. Chem.*, 2017, **82**, 7165–7175.
- 2 H. E. Gottlieb, V. Kotlyar and A. Nudelman, *J. Org. Chem.*, 1997, **62**, 7512–7515.
- 3 S. Das, S. Sinha, D. Samanta, R. Mondal, G. Chakraborty, P. Brandão and N. D. Paul, *J. Org. Chem.*, 2019, **84**, 10160-10171
